# Supplementary material for: Feasibility of F-18 radiolabeled brain-penetrable bi-specific antibody radioligands for in vivo PET imaging of tauopathy
Source: Royal Society of Chemistry journal article supplement (doi:10.1039/d4md00866a), 2025-01-01
Supplement: d4md00866a1.xlsx [file d4md00866a1.xlsx]

## Sheet: Study_Info
Scan_ID	Date	Scan	Strain	Mouse	Sex	Radiotracer	DOB	Scan Date	Age	Wt (kg)	Before (Act)	Before (Time)	Scan Start	After (Act)	After (Time)	t1/2 (min)	Time Difference Before (min)	Time Difference After (min)	Before (corrected)	After (corrected)	Dose Injected (MBq)
20220216_WT_DYN	20220216	DYN	WT	WT_L	M	TAUb	2021-01-03	2022-02-16	409	0.0459	15.762	09:25:00	09:29:00	3.404	09:29:00	109.77	4	0	15.3689	3.404	11.9649
20220216_WT_8hr	20220216	8hr	WT	WT_L	M	TAUb	2021-01-03	2022-02-16	409	0.0459	78.44	10:28:00	18:12:00	16.576	10:31:00	109.77	464	461	4.18869	0.902084	3.2866
20220216_WT_12hr	20220216	12hr	WT	WT_L	M	TAUb	2021-01-03	2022-02-16	409	0.0459	78.44	10:28:00	22:00:00	16.576	10:31:00	109.77	692	689	0.992698	0.21379	0.778909
20220216_PS19_DYN	20220216	DYN	PS19	PS19_M1	M	TAUb	2021-01-03	2022-02-16	409	0.0222	14.8	09:18:00	09:24:00	4.736	09:24:00	109.77	6	0	14.2498	4.736	9.51376
20220216_PS19_8hr	20220216	8hr	PS19	PS19_M1	M	TAUb	2021-01-03	2022-02-16	409	0.0222	78.07	10:22:00	18:12:00	19.24	10:26:00	109.77	470	466	4.01393	1.01452	2.99941
20220216_PS19_12hr	20220216	12hr	PS19	PS19_M1	M	TAUb	2021-01-03	2022-02-16	409	0.0222	78.07	10:22:00	22:00:00	19.24	10:26:00	109.77	698	694	0.951283	0.240436	0.710847
20220217_WT_DYN	20220217	DYN	WT	WT_R2	F	TAUs	2021-02-17	2022-02-17	365	0.0275	12.284	10:51:00	10:54:00	2.405	10:54:00	109.77	3	0	12.0535	2.405	9.64849
20220217_WT_8hr	20220217	8hr	WT	WT_R2	F	TAUs	2021-02-17	2022-02-17	365	0.0275	72.15	12:27:00	18:55:00	16.206	12:30:00	109.77	388	385	6.22582	1.42516	4.80066
20220217_WT_12hr	20220217	12hr	WT	WT_R2	F	TAUs	2021-02-17	2022-02-17	365	0.0275	72.15	12:27:00	22:00:00	16.206	12:30:00	109.77	573	570	1.93579	0.443123	1.49267
20220217_PS19_12hr	20220217	12hr	PS19	PS19_F1	F	TAUs	2021-02-17	2022-02-17	365	0.0262	79.92	12:22:00	22:00:00	17.76	12:24:00	109.77	578	576	2.07762	0.46756	1.61006
20220217_PS19_DYN	20220217	DYN	PS19	PS19_F1	F	TAUs	2021-02-17	2022-02-17	365	0.0262	11.877	10:44:00	10:48:00	1.998	10:48:00	109.77	4	0	11.5808	1.998	9.58277
20220217_PS19_8hr	20220217	8hr	PS19	PS19_F1	F	TAUs	2021-02-17	2022-02-17	365	0.0262	79.92	12:22:00	18:55:00	17.76	12:24:00	109.77	393	391	6.68196	1.50375	5.17821
20220225_WT_DYN	20220225	DYN	WT	WT_R2	F	TAUs	2021-02-17	2022-02-25	373	0.0263	7.03	09:35:00	09:41:00	0.962	09:41:00	109.77	6	0	6.76864	0.962	5.80664
20220225_WT_8hr	20220225	8hr	WT	WT_R2	F	TAUs	2021-02-17	2022-02-25	373	0.0263	72.15	10:36:00	18:10:00	15.36	10:38:00	109.771	454	452	4.10404	0.884812	3.21923
20220225_WT_12hr	20220225	12hr	WT	WT_R2	F	TAUs	2021-02-17	2022-02-25	373	0.0263	72.15	10:36:00	21:35:00	15.36	10:38:00	109.771	659	657	1.12468	0.242477	0.882208
20220225_PS19_12hr	20220225	12hr	PS19	PS19_F2	F	TAUs	2020-12-05	2022-02-25	447	0.0233	78.81	10:41:00	21:35:00	15.54	10:43:00	109.77	654	652	1.26786	0.253178	1.01468
20220225_PS19_DYN	20220225	DYN	PS19	PS19_F2	F	TAUs	2020-12-05	2022-02-25	447	0.0233	6.549	09:43:00	09:45:00	1.073	09:45:00	109.77	2	0	6.46681	1.073	5.39381
20220225_PS19_8hr	20220225	8hr	PS19	PS19_F2	F	TAUs	2020-12-05	2022-02-25	447	0.0233	78.81	10:41:00	18:10:00	15.54	10:43:00	109.77	449	447	4.62655	0.923871	3.70268
20220302_WT_DYN	20220302	DYN	WT	WT_LR	M	TAUs	2021-01-03	2022-03-02	423	0.0483	6.512	09:23:00	09:29:00	0.74	09:29:00	109.77	6	0	6.26989	0.74	5.52989
20220302_WT_8hr	20220302	8hr	WT	WT_LR	M	TAUs	2021-01-03	2022-03-02	423	0.0483	72.15	10:46:00	18:15:00	13.875	10:48:00	109.77	449	447	4.23557	0.824885	3.41069
20220302_WT_12hr	20220302	12hr	WT	WT_LR	M	TAUs	2021-01-03	2022-03-02	423	0.0483	72.15	10:46:00	21:41:00	13.875	10:48:00	109.77	655	653	1.15341	0.224629	0.928781
20220302_PS19_DYN	20220302	DYN	PS19	PS19_M1	M	TAUs	2021-01-03	2022-03-02	423	0.0207	6.105	09:20:00	09:24:00	1.11	09:24:00	109.77	4	0	5.95273	1.11	4.84273
20220302_PS19_8hr	20220302	8hr	PS19	PS19_M1	M	TAUs	2021-01-03	2022-03-02	423	0.0207	65.12	10:41:00	18:15:00	15.762	10:44:00	109.77	454	451	3.70406	0.913697	2.79036
20220302_PS19_12hr	20220302	12hr	PS19	PS19_M1	M	TAUs	2021-01-03	2022-03-02	423	0.0207	65.12	10:41:00	21:41:00	15.762	10:44:00	109.77	660	657	1.00867	0.248814	0.759858
20220303_WT_DYN	20220303	DYN	WT	WT_R1	F	TAUb	2020-10-20	2022-03-03	499	0.0268	6.771	10:14:00	10:24:00	1.813	10:24:00	109.77	10	0	6.35666	1.813	4.54366
20220303_WT_8hr	20220303	8hr	WT	WT_R1	F	TAUb	2020-10-20	2022-03-03	499	0.0268	78.81	11:13:00	18:35:00	25.863	11:15:00	109.77	442	440	4.83564	1.60707	3.22856
20220303_WT_12hr	20220303	12hr	WT	WT_R1	F	TAUb	2020-10-20	2022-03-03	499	0.0268	78.81	11:13:00	22:00:00	25.863	11:15:00	109.77	647	645	1.32516	0.440403	0.884755
20220303_PS19_12hr	20220303	12hr	PS19	PS19_F1	F	TAUb	2021-02-17	2022-03-03	379	0.026	74.37	11:09:00	22:00:00	21.941	11:12:00	109.77	651	648	1.21931	0.366607	0.852705
20220303_PS19_DYN	20220303	DYN	PS19	PS19_F1	F	TAUb	2021-02-17	2022-03-03	379	0.026	6.29	10:13:00	10:19:00	1.258	10:19:00	109.77	6	0	6.05615	1.258	4.79815
20220303_PS19_8hr	20220303	8hr	PS19	PS19_F1	F	TAUb	2021-02-17	2022-03-03	379	0.026	74.37	11:09:00	18:35:00	21.941	11:12:00	109.77	446	443	4.44939	1.33779	3.11161
20220304_WT_DYN	20220304	DYN	WT	WT_RR	F	TAUs	2020-10-20	2022-03-04	500	0.0317	7.696	09:35:00	09:40:00	1.85	09:40:00	109.77	5	0	7.45681	1.85	5.60681
20220304_WT_8hr	20220304	8hr	WT	WT_RR	F	TAUs	2020-10-20	2022-03-04	500	0.0317	68.635	10:29:00	18:50:00	14.43	10:35:00	109.77	501	495	2.90147	0.633568	2.2679
20220304_WT_12hr	20220304	12hr	WT	WT_RR	F	TAUs	2020-10-20	2022-03-04	500	0.0317	68.635	10:29:00	21:50:00	14.43	10:35:00	109.77	681	675	0.931089	0.203314	0.727776
20220310_PS19_12hr	20220310	12hr	PS19	PS19_F3	F	TAUs	2021-02-17	2022-03-10	386	0.0227	82.88	11:25:00	22:00:00	9.324	11:27:00	109.77	635	633	1.5033	0.17127	1.33203
20220310_PS19_DYN	20220310	DYN	PS19	PS19_F3	F	TAUs	2021-02-17	2022-03-10	386	0.0227	7.104	10:32:00	10:34:00	1.554	10:34:00	109.77	2	0	7.01485	1.554	5.46085
20220310_PS19_8hr	20220310	8hr	PS19	PS19_F3	F	TAUs	2021-02-17	2022-03-10	386	0.0227	82.88	11:25:00	18:45:00	9.324	11:27:00	109.77	440	438	5.14999	0.586738	4.56326
20220316_WT_12hr	20220316	12hr	WT	WT_R1	F	TAUs	2020-10-20	2022-03-16	512	0.0252	73.26	11:00:00	22:12:00	6.253	11:20:00	109.77	672	652	1.05195	0.101874	0.950073
20220316_WT_DYN	20220316	DYN	WT	WT_R1	F	TAUs	2020-10-20	2022-03-16	512	0.0252	7.326	09:38:00	09:46:00	0.814	09:46:00	109.77	8	0	6.96511	0.814	6.15111
20220316_WT_8hr	20220316	8hr	WT	WT_R1	F	TAUs	2020-10-20	2022-03-16	512	0.0252	73.26	11:00:00	19:00:00	6.253	11:20:00	109.77	480	460	3.53614	0.342451	3.19369
20220321_WT_DYN	20220321	DYN	WT	WT_R2	F	ABs	2021-02-17	2022-03-21	397	0.0262	7.289	09:36:00	09:42:00	1.147	09:42:00	109.77	6	0	7.01801	1.147	5.87101
20220321_WT_8hr	20220321	8hr	WT	WT_R2	F	ABs	2021-02-17	2022-03-21	397	0.0262	72.52	10:37:00	18:54:00	20.128	10:38:00	109.77	497	496	3.14412	0.878183	2.26594
20220321_WT_12hr	20220321	12hr	WT	WT_R2	F	ABs	2021-02-17	2022-03-21	397	0.0262	72.52	10:37:00	22:12:00	20.128	10:38:00	109.77	695	694	0.900555	0.251533	0.649022
20220321_PS19_12hr	20220321	12hr	PS19	PS19_F1	F	ABs	2021-02-17	2022-03-21	397	0.0265	77.7	10:34:00	22:12:00	18.944	10:36:00	109.77	698	696	0.946774	0.233766	0.713008
20220321_PS19_DYN	20220321	DYN	PS19	PS19_F1	F	ABs	2021-02-17	2022-03-21	397	0.0265	8.362	09:34:00	09:46:00	1.85	09:46:00	109.77	12	0	7.75178	1.85	5.90178
20220321_PS19_8hr	20220321	8hr	PS19	PS19_F1	F	ABs	2021-02-17	2022-03-21	397	0.0265	77.7	10:34:00	18:54:00	18.944	10:36:00	109.77	500	498	3.30549	0.816152	2.48934
20220323_WT_DYN	20220323	DYN	WT	WT_RR	F	ABs	2020-10-20	2022-03-23	519	0.0308	8.288	10:09:00	10:11:00	3.441	10:11:00	109.77	2	0	8.18399	3.441	4.74299
20220323_WT_8hr	20220323	8hr	WT	WT_RR	F	ABs	2020-10-20	2022-03-23	519	0.0308	72.89	11:02:00	18:48:00	20.165	11:08:00	109.77	466	460	3.84347	1.10435	2.73912
20220323_WT_12hr	20220323	12hr	WT	WT_RR	F	ABs	2020-10-20	2022-03-23	519	0.0308	72.89	11:02:00	22:46:00	20.165	11:08:00	109.77	704	698	0.855144	0.24571	0.609433
20220323_PS19_12hr	20220323	12hr	PS19	PS19_F3	F	ABs	2021-02-17	2022-03-23	399	0.0228	71.78	11:00:00	22:46:00	22.052	11:05:00	109.77	706	701	0.831553	0.263661	0.567892
20220323_PS19_DYN	20220323	DYN	PS19	PS19_F3	F	ABs	2021-02-17	2022-03-23	399	0.0228	8.51	10:06:00	10:08:00	3.256	10:08:00	109.77	2	0	8.4032	3.256	5.1472
20220323_PS19_8hr	20220323	8hr	PS19	PS19_F3	F	ABs	2021-02-17	2022-03-23	399	0.0228	71.78	11:00:00	18:48:00	22.052	11:05:00	109.77	468	463	3.73744	1.18503	2.55241

## Sheet: Dynamic_pIDcc
Scan_ID	Date	Strain	Mouse	Radiotracer	Scan	Sex	Age (weeks)	Weight (kg)	Dose (MBq)	Time (sec)	Time (min)	Amygdala	Anterior Commissure	Basal forebrain and septum	Brainstem	Caudate putamen	Central gray	Cerebellum	External capsule	Fimbria	Globus pallidus	Hippocampus	Hypothalamus	Inferior colliculi	Internal Capsule	Neocortex	Olfactory bulb	Rest of the midbrain	Superior colliculi	Thalamus	Ventricles	Whole Brain
20220216_PS19_DYN	20220216	PS19	PS19_M1	TAUb	DYN	M	58.4286	0.0222	9.51376	0	0	-0.00566126	0.0347625	0.0032214	0.0010076	0.00173195	-0.0129485	-0.00474594	-0.00729868	0.0420259	0.00317934	2.50164e-05	0.0177206	0.0205508	-0.0119058	-0.00074736	0.0238751	-0.00463443	0.0142493	-0.00452508	0.011563	0
20220216_PS19_DYN	20220216	PS19	PS19_M1	TAUb	DYN	M	58.4286	0.0222	9.51376	30	0.5	0.0242214	0.0137317	0.0109202	0.0217039	0.000432847	-0.0206351	0.00617333	-0.00334898	-0.023017	0.0015455	0.00358226	0.0137251	0.0152538	0.0130153	0.001306	0.0286529	-0.00859868	-0.00702058	-0.0222318	-0.00454791	0.00350203
20220216_PS19_DYN	20220216	PS19	PS19_M1	TAUb	DYN	M	58.4286	0.0222	9.51376	60	1	0.0199654	0.00724692	0.0221409	0.00768746	-0.00194796	-0.0173448	-0.0134452	-0.00624501	-0.0192801	0.00170503	-0.00942959	0.00110335	0.0190717	0.000952221	0.00453274	0.0151358	0.00433644	0.00161893	-0.00599837	0.00881295	-0.00107025
20220216_PS19_DYN	20220216	PS19	PS19_M1	TAUb	DYN	M	58.4286	0.0222	9.51376	90	1.5	0.0250036	0.0306573	0.0492088	0.018459	0.020379	0.000363957	0.00408806	-0.00073975	-0.0165271	-0.0163897	0.00782741	0.0223307	0.0371179	0.0113983	0.0213318	0.0454221	0.0288353	0.020909	-0.000226588	0.015295	0.014159
20220216_PS19_DYN	20220216	PS19	PS19_M1	TAUb	DYN	M	58.4286	0.0222	9.51376	120	2	0.04166	0.0893151	0.0669305	0.0354378	0.0386269	0.00291144	0.00203348	0.00428822	0.0282033	0.0289092	0.0102054	0.0536948	0.0267105	0.0297423	0.0200557	0.0515903	0.0359091	0.0281686	0.0222801	0.0091415	0.0254531
20220216_PS19_DYN	20220216	PS19	PS19_M1	TAUb	DYN	M	58.4286	0.0222	9.51376	150	2.5	0.0652286	0.158008	0.100395	0.0570679	0.0358159	0.0413931	0.0525331	0.0552217	0.0679514	0.108463	0.0175693	0.0473914	0.0386289	0.0307601	0.0558126	0.0871935	0.0414696	0.0342935	0.0280096	0.0328232	0.0482151
20220216_PS19_DYN	20220216	PS19	PS19_M1	TAUb	DYN	M	58.4286	0.0222	9.51376	180	3	0.0306795	0.112809	0.122275	0.049823	0.0481576	-0.00100995	0.0287733	0.0250721	-0.0168929	0.0357474	0.0178758	0.114661	0.00679097	-0.00170001	0.0424256	0.0366147	0.0304551	0.00682717	0.0280627	0.0155915	0.0419175
20220216_PS19_DYN	20220216	PS19	PS19_M1	TAUb	DYN	M	58.4286	0.0222	9.51376	210	3.5	0.0883739	0.0115049	0.0597332	0.0431491	0.0720624	0.0141119	0.0294954	0.0716004	0.0904318	0.0393497	0.0282874	0.0763282	0.046327	0.0954326	0.0441111	0.109656	0.0309862	0.0226049	0.0395256	0.0514306	0.0414893
20220216_PS19_DYN	20220216	PS19	PS19_M1	TAUb	DYN	M	58.4286	0.0222	9.51376	240	4	0.117564	-0.0042859	0.0647482	0.0511837	0.0390131	0.0100556	0.0331992	0.0817452	0.142302	0.0695253	0.0273248	0.0650244	0.0713878	0.134428	0.0463826	0.0919246	0.0182008	0.0151859	0.0379088	0.0193085	0.0419335
20220216_PS19_DYN	20220216	PS19	PS19_M1	TAUb	DYN	M	58.4286	0.0222	9.51376	270	4.5	0.0649339	0.0957026	0.071295	0.0554519	0.0535003	0.0411852	0.0458767	0.0646254	0.0301585	0.0123799	0.0335588	0.0743195	0.0919122	0.0101814	0.0509423	0.0967613	0.0609404	0.0474557	0.0147112	0.00190054	0.0457881
20220216_PS19_DYN	20220216	PS19	PS19_M1	TAUb	DYN	M	58.4286	0.0222	9.51376	300	5	0.0266668	0.0793007	0.0706277	0.0614615	0.0350664	0.0271754	0.0273148	0.0135246	-0.0212626	0.0326733	0.0219153	0.0998889	0.0423491	0.025238	0.0558857	0.0963553	0.0336603	0.0170992	0.0292768	0.049366	0.0408835
20220216_PS19_DYN	20220216	PS19	PS19_M1	TAUb	DYN	M	58.4286	0.0222	9.51376	330	5.5	0.0926196	0.0703159	0.0927001	0.0456214	0.0373922	0.0238691	0.014503	0.0373326	-0.0037082	-0.0166048	0.0411053	0.0544472	0.0364735	-0.00119851	0.0491658	0.0965001	0.026006	0.00927775	0.0203418	0.0841675	0.0384241
20220216_PS19_DYN	20220216	PS19	PS19_M1	TAUb	DYN	M	58.4286	0.0222	9.51376	360	6	0.101026	0.0904304	0.137988	0.089305	0.101288	0.0148132	0.0682575	0.0219176	0.0559435	0.0861564	0.0473282	0.0867243	0.0716443	0.126579	0.061852	0.113568	0.052883	0.0408981	0.0849961	0.187722	0.0697779
20220216_PS19_DYN	20220216	PS19	PS19_M1	TAUb	DYN	M	58.4286	0.0222	9.51376	390	6.5	0.0629458	0.143346	0.150549	0.0794596	0.0788114	0.0229415	0.0288693	0.044221	0.0370923	0.0933062	0.0269193	0.0812392	0.152476	0.0390392	0.0634641	0.144979	0.0300584	0.0655611	0.0564757	0.0457557	0.0614428
20220216_PS19_DYN	20220216	PS19	PS19_M1	TAUb	DYN	M	58.4286	0.0222	9.51376	420	7	0.12972	0.172758	0.173084	0.0965638	0.0895429	0.0578449	0.0585161	0.0301951	0.0119081	0.0732078	0.0430403	0.134167	0.134195	0.0606266	0.0564172	0.147086	0.0496179	0.0388827	0.0426944	0.0728618	0.0681765
20220216_PS19_DYN	20220216	PS19	PS19_M1	TAUb	DYN	M	58.4286	0.0222	9.51376	450	7.5	0.0722711	0.0800914	0.136047	0.100763	0.0796383	0.0408902	0.0663808	0.0785583	0.09151	0.0331205	0.0662088	0.134802	0.140335	0.022993	0.0938892	0.161311	0.0457974	0.0991633	0.0474662	0.120242	0.0787294
20220216_PS19_DYN	20220216	PS19	PS19_M1	TAUb	DYN	M	58.4286	0.0222	9.51376	480	8	0.125999	0.142392	0.135849	0.108274	0.0461791	0.0921082	0.0800302	0.086703	0.0124997	0.0791265	0.0284092	0.118728	0.0995519	0.0692128	0.0984838	0.22907	0.0775235	0.0410267	0.0668803	0.0582742	0.0862061
20220216_PS19_DYN	20220216	PS19	PS19_M1	TAUb	DYN	M	58.4286	0.0222	9.51376	510	8.5	0.0968279	0.100542	0.124515	0.120707	0.107547	0.0549924	0.0918372	0.0739647	0.128223	0.0313107	0.0625553	0.139689	0.116171	0.0506201	0.0973255	0.149836	0.0791047	0.150921	0.0757929	0.0201003	0.0968062
20220216_PS19_DYN	20220216	PS19	PS19_M1	TAUb	DYN	M	58.4286	0.0222	9.51376	540	9	0.0987327	0.17338	0.11383	0.124829	0.0818607	0.11158	0.0452885	0.105636	0.120597	0.0170524	0.066239	0.147239	0.060643	0.0288135	0.105617	0.16831	0.0358355	0.105497	0.0464478	0.0491319	0.0911963
20220216_PS19_DYN	20220216	PS19	PS19_M1	TAUb	DYN	M	58.4286	0.0222	9.51376	570	9.5	0.203871	0.281597	0.132248	0.118319	0.0945973	0.0111525	0.0718384	0.0735579	0.14754	0.12078	0.0772228	0.107625	0.151652	0.0977629	0.0942906	0.189181	0.0688378	0.0582292	0.0886769	0.0849216	0.0959987
20220216_PS19_DYN	20220216	PS19	PS19_M1	TAUb	DYN	M	58.4286	0.0222	9.51376	600	10	0.144611	0.123088	0.186115	0.0854734	0.131339	0.101904	0.0494434	0.0810816	0.116774	0.0608661	0.0389072	0.178136	0.125716	0.0942261	0.104013	0.20012	0.0719342	0.0856934	0.0637419	0.149422	0.0905237
20220216_PS19_DYN	20220216	PS19	PS19_M1	TAUb	DYN	M	58.4286	0.0222	9.51376	630	10.5	0.163773	0.179362	0.156822	0.146287	0.107615	0.117577	0.0829409	0.151094	0.0647185	0.0340605	0.138191	0.212934	0.134077	0.0990621	0.133285	0.227399	0.116346	0.186931	0.0641486	0.0906229	0.127215
20220216_PS19_DYN	20220216	PS19	PS19_M1	TAUb	DYN	M	58.4286	0.0222	9.51376	660	11	0.180682	0.115529	0.169458	0.135202	0.149573	0.0686415	0.11227	0.103896	0.0262651	0.0502451	0.0868668	0.182327	0.212599	0.119386	0.130209	0.215552	0.185132	0.094934	0.112267	0.180055	0.131516
20220216_PS19_DYN	20220216	PS19	PS19_M1	TAUb	DYN	M	58.4286	0.0222	9.51376	690	11.5	0.139818	0.230088	0.195931	0.190802	0.127781	0.149579	0.110752	0.111712	-0.0215061	0.0915741	0.0939323	0.149912	0.182743	0.0920795	0.156075	0.312287	0.0894923	0.122458	0.088449	0.0501485	0.135515
20220216_PS19_DYN	20220216	PS19	PS19_M1	TAUb	DYN	M	58.4286	0.0222	9.51376	720	12	0.273243	0.290423	0.220121	0.243536	0.138872	0.065146	0.099276	0.149221	0.175195	0.0886624	0.10992	0.330024	0.136752	0.118906	0.176422	0.320138	0.165954	0.0934129	0.115656	0.0825711	0.167367
20220216_PS19_DYN	20220216	PS19	PS19_M1	TAUb	DYN	M	58.4286	0.0222	9.51376	750	12.5	0.207727	0.283777	0.159584	0.142303	0.121987	0.0074529	0.0531259	0.0725029	0.222284	0.213454	0.0598076	0.18816	0.188271	0.194377	0.134044	0.204622	0.0734419	0.0935225	0.122056	0.0258513	0.113581
20220216_PS19_DYN	20220216	PS19	PS19_M1	TAUb	DYN	M	58.4286	0.0222	9.51376	780	13	0.198617	0.275825	0.269886	0.178088	0.146474	0.158496	0.0782305	0.10499	0.0897102	0.097909	0.119806	0.173655	0.0794368	0.0743774	0.16897	0.288335	0.171857	0.0811722	0.132717	0.0440015	0.150095
20220216_PS19_DYN	20220216	PS19	PS19_M1	TAUb	DYN	M	58.4286	0.0222	9.51376	810	13.5	0.0869996	0.226261	0.177509	0.112841	0.0735295	0.0339928	0.131152	0.0975392	0.355464	0.0507245	0.127842	0.117054	0.0564513	0.0303498	0.130129	0.187925	0.0593529	0.0565869	0.1431	0.0871554	0.120078
20220216_PS19_DYN	20220216	PS19	PS19_M1	TAUb	DYN	M	58.4286	0.0222	9.51376	840	14	0.206346	0.358029	0.222564	0.173402	0.171833	0.134399	0.0807204	0.155037	0.0814288	0.24547	0.112312	0.149373	0.0832897	0.0673196	0.173168	0.277461	0.220641	0.128139	0.112898	0.128304	0.154405
20220216_PS19_DYN	20220216	PS19	PS19_M1	TAUb	DYN	M	58.4286	0.0222	9.51376	870	14.5	0.183644	0.21268	0.198324	0.146458	0.0950556	0.202379	0.157484	0.132959	0.0498844	0.107023	0.133597	0.130344	0.288015	0.0503644	0.161171	0.261284	0.0853722	0.158402	0.0937667	0.104831	0.143417
20220216_PS19_DYN	20220216	PS19	PS19_M1	TAUb	DYN	M	58.4286	0.0222	9.51376	900	15	0.301438	0.147619	0.135164	0.203372	0.154875	0.0784785	0.070559	0.0985143	0.205807	0.340956	0.132646	0.164991	0.168176	0.199315	0.134559	0.286085	0.1052	0.0819786	0.120683	0.154379	0.146505
20220216_PS19_DYN	20220216	PS19	PS19_M1	TAUb	DYN	M	58.4286	0.0222	9.51376	930	15.5	0.202853	0.194357	0.241746	0.201759	0.180741	0.0443797	0.0985935	0.12089	0.295848	0.0361344	0.115033	0.208548	0.181404	0.171141	0.144248	0.179258	0.182766	0.140751	0.0636537	0.111166	0.139676
20220216_PS19_DYN	20220216	PS19	PS19_M1	TAUb	DYN	M	58.4286	0.0222	9.51376	960	16	0.22378	0.0506623	0.194214	0.171063	0.152707	0.0953477	0.132254	0.144276	0.0428515	0.0923304	0.130249	0.134896	0.14806	0.19355	0.144624	0.307992	0.0779578	0.18171	0.0890367	0.120326	0.136076
20220216_PS19_DYN	20220216	PS19	PS19_M1	TAUb	DYN	M	58.4286	0.0222	9.51376	990	16.5	0.225028	0.250648	0.253624	0.150352	0.137813	0.177111	0.0754837	0.128124	0.113183	0.0228277	0.14052	0.212334	0.211604	0.141817	0.160089	0.192134	0.123413	0.23896	0.119272	0.145088	0.143871
20220216_PS19_DYN	20220216	PS19	PS19_M1	TAUb	DYN	M	58.4286	0.0222	9.51376	1020	17	0.20341	0.194859	0.180876	0.136445	0.0913915	0.0745755	0.0742613	0.0720788	0.298135	0.0711905	0.0843443	0.143377	0.0697751	0.0967031	0.113018	0.226674	0.0891654	0.0630343	0.11711	0.137998	0.109306
20220216_PS19_DYN	20220216	PS19	PS19_M1	TAUb	DYN	M	58.4286	0.0222	9.51376	1050	17.5	0.134167	0.118623	0.168919	0.163333	0.0868614	0.123212	0.136338	0.0955939	0.049773	0.0435735	0.0913167	0.225428	0.15598	0.0806843	0.113509	0.306865	0.129607	0.133569	0.0901473	0.21623	0.129129
20220216_PS19_DYN	20220216	PS19	PS19_M1	TAUb	DYN	M	58.4286	0.0222	9.51376	1080	18	0.0703243	0.187688	0.217229	0.109088	0.111759	0.152894	0.0965563	0.110545	0.164434	0.033536	0.0904852	0.148194	0.106416	0.0167463	0.146574	0.1743	0.106057	0.141411	0.0751151	0.162879	0.115273
20220216_PS19_DYN	20220216	PS19	PS19_M1	TAUb	DYN	M	58.4286	0.0222	9.51376	1110	18.5	0.139241	0.0883675	0.172194	0.16674	0.134886	0.0662221	0.0770551	0.0881389	0.0665891	0.0566858	0.083042	0.164612	0.135388	0.0574548	0.122201	0.214004	0.0915459	0.0570579	0.128545	0.180811	0.116267
20220216_PS19_DYN	20220216	PS19	PS19_M1	TAUb	DYN	M	58.4286	0.0222	9.51376	1140	19	0.138312	0.168307	0.180914	0.105065	0.16637	0.0360956	0.0695241	0.0913148	0.127731	0.104285	0.0813054	0.198678	0.154195	0.0987508	0.107405	0.234648	0.0523705	0.138614	0.0678768	0.133629	0.103936
20220216_PS19_DYN	20220216	PS19	PS19_M1	TAUb	DYN	M	58.4286	0.0222	9.51376	1170	19.5	0.120302	0.137267	0.18755	0.147521	0.1347	0.0538921	0.0757168	0.0919378	0.130977	0.111398	0.0821073	0.122536	0.154	0.0739417	0.125779	0.214982	0.0771727	0.116089	0.0584533	0.164738	0.112315
20220216_PS19_DYN	20220216	PS19	PS19_M1	TAUb	DYN	M	58.4286	0.0222	9.51376	1200	20	0.147696	0.246854	0.199609	0.172003	0.085691	0.176532	0.111534	0.176733	0.0644849	0.0214457	0.129142	0.184067	0.157218	0.167169	0.151107	0.167011	0.122282	0.100563	0.127285	0.150477	0.129717
20220216_PS19_DYN	20220216	PS19	PS19_M1	TAUb	DYN	M	58.4286	0.0222	9.51376	1230	20.5	0.210237	0.150369	0.118573	0.151423	0.121404	0.189753	0.0751575	0.108935	0.102563	0.0978092	0.109687	0.102909	0.132636	0.142533	0.112662	0.179139	0.107693	0.104059	0.059883	0.0744662	0.112388
20220216_PS19_DYN	20220216	PS19	PS19_M1	TAUb	DYN	M	58.4286	0.0222	9.51376	1260	21	0.136948	0.171271	0.173727	0.110631	0.111356	0.067855	0.0739885	0.157644	0.199405	0.0792519	0.116535	0.230364	0.0790693	0.136476	0.140454	0.20006	0.0788399	0.0759562	0.0963339	0.0838495	0.115293
20220216_PS19_DYN	20220216	PS19	PS19_M1	TAUb	DYN	M	58.4286	0.0222	9.51376	1290	21.5	0.150156	0.22204	0.147855	0.176409	0.114043	0.0257702	0.0997905	0.0860466	0.150986	0.101116	0.101711	0.244036	0.132519	0.116418	0.141936	0.21911	0.0651688	0.0610581	0.0775945	0.0035147	0.126544
20220216_PS19_DYN	20220216	PS19	PS19_M1	TAUb	DYN	M	58.4286	0.0222	9.51376	1320	22	0.137339	0.29224	0.209136	0.135823	0.0951542	0.0484176	0.089002	0.115153	0.236397	0.0286024	0.100381	0.225721	0.13301	0.100029	0.130248	0.173884	0.126705	0.036444	0.0818895	0.10521	0.113101
20220216_PS19_DYN	20220216	PS19	PS19_M1	TAUb	DYN	M	58.4286	0.0222	9.51376	1350	22.5	0.162653	0.147218	0.233445	0.173574	0.123848	0.0341331	0.0963361	0.109637	0.111615	0.0757868	0.0862839	0.214565	0.0358197	0.244291	0.121245	0.222624	0.0798811	0.149782	0.12633	0.229954	0.129852
20220216_PS19_DYN	20220216	PS19	PS19_M1	TAUb	DYN	M	58.4286	0.0222	9.51376	1380	23	0.117629	0.118647	0.117101	0.136702	0.184502	0.131371	0.0790532	0.162627	0.0256159	0.134174	0.0594917	0.219129	0.0832558	0.0727841	0.141306	0.16629	0.122158	0.134712	0.15416	0.129644	0.126223
20220216_PS19_DYN	20220216	PS19	PS19_M1	TAUb	DYN	M	58.4286	0.0222	9.51376	1410	23.5	0.204921	0.113283	0.114081	0.139252	0.0728616	0.165461	0.107388	0.125593	0.355969	-0.00255206	0.117082	0.174464	0.170649	0.130513	0.128908	0.205839	0.0740532	0.147288	0.139538	0.0669101	0.12239
20220216_PS19_DYN	20220216	PS19	PS19_M1	TAUb	DYN	M	58.4286	0.0222	9.51376	1440	24	0.269257	0.211559	0.179561	0.136402	0.120589	0.0796141	0.125038	0.0820464	0.0391929	0.0990187	0.113657	0.0933669	0.205696	0.177897	0.133233	0.245872	0.0666772	0.103259	0.068982	0.0723959	0.125526
20220216_PS19_DYN	20220216	PS19	PS19_M1	TAUb	DYN	M	58.4286	0.0222	9.51376	1470	24.5	0.130245	0.147173	0.135232	0.166547	0.126468	0.115216	0.10206	0.139185	-0.0129994	0.164607	0.12627	0.0846453	0.188117	0.075873	0.1493	0.143423	0.0743086	0.118381	0.0846495	0.0766818	0.117055
20220216_PS19_DYN	20220216	PS19	PS19_M1	TAUb	DYN	M	58.4286	0.0222	9.51376	1500	25	0.177568	0.102459	0.131727	0.12733	0.100592	0.136225	0.0650598	0.126792	0.0105536	0.0638512	0.131861	0.155676	0.0885023	0.033926	0.123706	0.180052	0.126794	0.113994	0.0698823	0.0698094	0.115776
20220216_PS19_DYN	20220216	PS19	PS19_M1	TAUb	DYN	M	58.4286	0.0222	9.51376	1530	25.5	0.172558	0.0956347	0.169158	0.149938	0.0937121	0.0795786	0.107682	0.162879	0.313678	0.113958	0.110601	0.215587	0.168602	0.090675	0.119816	0.224003	0.106521	0.0805945	0.0371916	0.20006	0.117567
20220216_PS19_DYN	20220216	PS19	PS19_M1	TAUb	DYN	M	58.4286	0.0222	9.51376	1560	26	0.120069	0.0743821	0.151365	0.149732	0.145389	0.033313	0.112418	0.0851717	0.0360329	0.020741	0.096551	0.1974	0.0945865	0.0893763	0.122803	0.21011	0.122093	0.0491489	0.0940512	0.0560144	0.119285
20220216_PS19_DYN	20220216	PS19	PS19_M1	TAUb	DYN	M	58.4286	0.0222	9.51376	1590	26.5	0.244033	0.237825	0.216017	0.133298	0.117888	0.154629	0.0915508	0.0778466	0.0496467	0.135597	0.0873975	0.24646	0.158434	0.120695	0.11909	0.241176	0.0893704	0.116649	0.114958	0.150126	0.120987
20220216_PS19_DYN	20220216	PS19	PS19_M1	TAUb	DYN	M	58.4286	0.0222	9.51376	1620	27	0.183464	0.22004	0.196052	0.105734	0.156207	0.145545	0.118329	0.139846	0.0983542	0.132883	0.113852	0.120552	0.0782605	0.124618	0.110963	0.173231	0.0619583	0.0590822	0.107067	0.112972	0.115379
20220216_PS19_DYN	20220216	PS19	PS19_M1	TAUb	DYN	M	58.4286	0.0222	9.51376	1650	27.5	0.114769	0.273551	0.177239	0.134885	0.173231	0.143233	0.0887635	0.145627	0.0116106	-0.00704464	0.0654237	0.118076	0.192691	0.143812	0.124135	0.178398	0.0771345	0.148227	0.0538606	0.129168	0.113557
20220216_PS19_DYN	20220216	PS19	PS19_M1	TAUb	DYN	M	58.4286	0.0222	9.51376	1680	28	0.131794	0.081597	0.0934278	0.119402	0.0722643	0.0502952	0.140773	0.138254	0.130327	0.0839197	0.0872627	0.184873	0.124802	0.00859724	0.129162	0.180891	0.0530602	0.115445	0.111064	0.0976968	0.112961
20220216_PS19_DYN	20220216	PS19	PS19_M1	TAUb	DYN	M	58.4286	0.0222	9.51376	1710	28.5	0.169749	0.11434	0.108979	0.128224	0.0979524	0.0932869	0.0707021	0.093388	0.139138	0.0967873	0.0799604	0.119044	0.0578549	0.156373	0.114546	0.212847	0.170599	0.135751	0.11277	0.127968	0.106026
20220216_PS19_DYN	20220216	PS19	PS19_M1	TAUb	DYN	M	58.4286	0.0222	9.51376	1740	29	0.179899	0.226189	0.152528	0.13223	0.0853357	0.101656	0.0786416	0.0963259	0.135204	0.212047	0.0981217	0.0762258	0.125356	0.131279	0.106696	0.161094	0.0568292	0.107854	0.0536687	0.128281	0.101394
20220216_PS19_DYN	20220216	PS19	PS19_M1	TAUb	DYN	M	58.4286	0.0222	9.51376	1770	29.5	0.169423	0.0947392	0.153905	0.160024	0.116011	0.123758	0.124557	0.156057	0.0147575	0.00898128	0.0787502	0.136368	0.1301	0.0557265	0.129251	0.266174	0.0895198	0.128073	0.0977884	0.248912	0.132522
20220216_WT_DYN	20220216	WT	WT_L	TAUb	DYN	M	58.4286	0.0459	11.9649	0	0	0.0053834		0.0180318	-0.000885041	-0.00457729	0.0046837	0.00554996	-0.0058333		0.0134468	0.000927323	-0.00285734	0.0101665	-0.0111708	0.000874101	0.00817427	-0.00459511	0.00754353	-0.00140889	-0.00666505	0
20220216_WT_DYN	20220216	WT	WT_L	TAUb	DYN	M	58.4286	0.0459	11.9649	30	0.5	0.00422268		0.0162831	-0.00170301	0.0106799	0.0109121	0.00793562	0.00735035		-0.000427117	0.00529042	0.00272729	0.0118318	-0.00764444	0.00217019	0.0113445	-0.00242985	0.00507775	0.00242025	0.00554408	0.00390309
20220216_WT_DYN	20220216	WT	WT_L	TAUb	DYN	M	58.4286	0.0459	11.9649	60	1	0.00185384		-0.00138388	0.00492099	0.0072417	-0.000830114	-0.000188619	1.46178e-05		0.000508539	0.00208494	0.0102309	-0.00553505	0.00722225	0.00291739	0.0183756	0.00264535	0.016168	0.0112408	-0.000884874	0.00400209
20220216_WT_DYN	20220216	WT	WT_L	TAUb	DYN	M	58.4286	0.0459	11.9649	90	1.5	0.0183101		0.021944	0.0123824	0.0057991	-0.000372691	0.0167948	0.00352473		0.0117039	0.0173326	0.0354768	0.0160105	0.0142421	0.015776	0.0421001	0.00787685	0.00548663	0.0061182	0.012688	0.0129363
20220216_WT_DYN	20220216	WT	WT_L	TAUb	DYN	M	58.4286	0.0459	11.9649	120	2	0.0346812		0.0395762	0.0145403	0.0229802	0.0042448	0.01475	0.0105613		0.0415467	0.0142588	0.0442088	0.0237114	0.0599988	0.0236058	0.028436	0.00204504	0.00700365	0.00565857	0.0116822	0.0158214
20220216_WT_DYN	20220216	WT	WT_L	TAUb	DYN	M	58.4286	0.0459	11.9649	150	2.5	0.0527209		0.0415327	0.0356502	0.0252737	0.0165998	0.0220986	0.00819982		0.0246379	0.0248775	0.0741056	0.0399981	0.0329886	0.0276732	0.0370888	0.0263865	0.0233618	0.0203866	0.00159337	0.02911
20220216_WT_DYN	20220216	WT	WT_L	TAUb	DYN	M	58.4286	0.0459	11.9649	180	3	0.054649		0.0248727	0.0317215	0.0180397	0.0283094	0.0251401	0.0141494		0.0397576	0.0227784	0.0438121	0.0585529	0.0216201	0.0294519	0.0477152	0.00594048	0.037404	0.0287019	0.0298876	0.0285906
20220216_WT_DYN	20220216	WT	WT_L	TAUb	DYN	M	58.4286	0.0459	11.9649	210	3.5	0.0541887		0.0354615	0.0287269	0.0181194	0.00673468	0.0207976	0.0176545		0.0466278	0.01512	0.0449484	0.0280148	0.00932525	0.0261652	0.0351294	0.0393278	0.0264827	0.0251851	0.0127731	0.0234166
20220216_WT_DYN	20220216	WT	WT_L	TAUb	DYN	M	58.4286	0.0459	11.9649	240	4	0.0365375		0.0608157	0.0295788	0.0179558	0.0174988	0.0297442	0.011069		0.0448835	0.0258265	0.0590145	0.0240695	0.00392028	0.0336679	0.0683602	0.0295921	0.0341946	0.0151601	0.0124293	0.0290813
20220216_WT_DYN	20220216	WT	WT_L	TAUb	DYN	M	58.4286	0.0459	11.9649	270	4.5	0.0281637		0.0409667	0.0351918	0.0166136	0.057864	0.0455167	0.0251615		0.0181973	0.035812	0.045389	0.0571291	0.0191599	0.0362242	0.0432375	0.0364985	0.0403081	0.0302236	0.0444473	0.0341982
20220216_WT_DYN	20220216	WT	WT_L	TAUb	DYN	M	58.4286	0.0459	11.9649	300	5	0.0794767		0.0405672	0.0359399	0.0253634	0.0828194	0.0421837	0.0445792		0.02186	0.0663696	0.0426886	0.0477527	0.015307	0.033341	0.0761256	0.0327048	0.0464308	0.0442929	0.0363781	0.0394011
20220216_WT_DYN	20220216	WT	WT_L	TAUb	DYN	M	58.4286	0.0459	11.9649	330	5.5	0.0487661		0.086849	0.0440118	0.0392449	0.0269768	0.0457581	0.0415437		0.0316268	0.0476574	0.0767803	0.0857782	0.0375064	0.0492767	0.0549952	0.0395313	0.0171379	0.0182797	0.023894	0.0399344
20220216_WT_DYN	20220216	WT	WT_L	TAUb	DYN	M	58.4286	0.0459	11.9649	360	6	0.0319572		0.0658149	0.0463723	0.0330009	0.0330494	0.0603184	0.0325423		0.0331356	0.0369972	0.0687694	0.0428782	0.0449975	0.0469637	0.0549146	0.0324006	0.0451776	0.0355043	0.0277982	0.0417692
20220216_WT_DYN	20220216	WT	WT_L	TAUb	DYN	M	58.4286	0.0459	11.9649	390	6.5	0.060211		0.0825125	0.0494885	0.0374148	0.0252184	0.0451072	0.0560562		0.0546657	0.0412126	0.0583924	0.0303877	0.041005	0.051343	0.0845577	0.0125948	0.0511654	0.0497332	0.0456896	0.044689
20220216_WT_DYN	20220216	WT	WT_L	TAUb	DYN	M	58.4286	0.0459	11.9649	420	7	0.0803508		0.0766147	0.0678592	0.0447438	0.0714576	0.0367346	0.0521463		0.0493745	0.0200752	0.100109	0.0524454	0.00938193	0.0607937	0.107851	0.0613164	0.0347367	0.0469509	0.0567411	0.0489642
20220216_WT_DYN	20220216	WT	WT_L	TAUb	DYN	M	58.4286	0.0459	11.9649	450	7.5	0.0281209		0.0799451	0.0584521	0.0403412	0.0784644	0.0954073	0.068204		0.0241752	0.0534539	0.0593385	0.0869182	-0.00343573	0.0626754	0.0939293	0.083086	0.0606419	0.0366115	0.0960012	0.0622852
20220216_WT_DYN	20220216	WT	WT_L	TAUb	DYN	M	58.4286	0.0459	11.9649	480	8	0.0907237		0.0785456	0.080861	0.0405918	0.0522659	0.0685605	0.0470039		0.00921767	0.0590279	0.0418478	0.103501	0.0323239	0.0714189	0.113613	0.0798177	0.0651348	0.0439479	0.0427333	0.0621633
20220216_WT_DYN	20220216	WT	WT_L	TAUb	DYN	M	58.4286	0.0459	11.9649	510	8.5	0.0782928		0.0964264	0.072106	0.0468169	0.0651761	0.0653583	0.0652493		0.0691696	0.0619815	0.095376	0.0832049	0.0332352	0.0698278	0.101538	0.0408816	0.0418329	0.0437215	0.0687898	0.0622273
20220216_WT_DYN	20220216	WT	WT_L	TAUb	DYN	M	58.4286	0.0459	11.9649	540	9	0.0975185		0.1131	0.0551313	0.0598244	0.102771	0.0929602	0.0522192		0.0488471	0.0530941	0.0995081	0.0530762	0.0451085	0.0740988	0.0680088	0.0490717	0.112436	0.0649946	0.0264604	0.0680307
20220216_WT_DYN	20220216	WT	WT_L	TAUb	DYN	M	58.4286	0.0459	11.9649	570	9.5	0.0892949		0.103477	0.0630008	0.0597251	0.0678775	0.0898408	0.0894895		0.0700665	0.0388208	0.109075	0.11103	0.135083	0.0847004	0.115416	0.0464786	0.0827425	0.0306333	0.0486911	0.0714049
20220216_WT_DYN	20220216	WT	WT_L	TAUb	DYN	M	58.4286	0.0459	11.9649	600	10	0.0809131		0.0874411	0.0577771	0.109597	0.0476439	0.0456217	0.0777271		0.0720597	0.0795344	0.0791147	0.0592195	0.116917	0.0949671	0.153988	0.0510102	0.104475	0.0708126	0.112544	0.0723737
20220216_WT_DYN	20220216	WT	WT_L	TAUb	DYN	M	58.4286	0.0459	11.9649	630	10.5	0.0624759		0.102363	0.119128	0.127806	0.118337	0.111659	0.0752488		0.0666628	0.0720552	0.132866	0.183714	0.0782573	0.0924858	0.130489	0.0727375	0.164034	0.0754538	0.11051	0.10173
20220216_WT_DYN	20220216	WT	WT_L	TAUb	DYN	M	58.4286	0.0459	11.9649	660	11	0.0760389		0.183845	0.0784091	0.0561803	0.06131	0.0906745	0.0705522		0.0197698	0.0857666	0.137818	0.0724926	0.0441443	0.0997222	0.152011	0.0679512	0.0783566	0.0425998	0.0449962	0.0850403
20220216_WT_DYN	20220216	WT	WT_L	TAUb	DYN	M	58.4286	0.0459	11.9649	690	11.5	0.137666		0.0945481	0.079732	0.0604391	0.0923732	0.102428	0.0658703		0.168047	0.0837761	0.0922446	0.14511	0.0355876	0.0947396	0.0935224	0.0767134	0.0957163	0.0704567	0.0684809	0.0844045
20220216_WT_DYN	20220216	WT	WT_L	TAUb	DYN	M	58.4286	0.0459	11.9649	720	12	0.107665		0.101546	0.102275	0.101692	0.0863297	0.129588	0.0680265		0.0828072	0.0823347	0.123327	0.0987942	0.0180565	0.113254	0.141394	0.102036	0.0369861	0.0465413	0.101775	0.0945904
20220216_WT_DYN	20220216	WT	WT_L	TAUb	DYN	M	58.4286	0.0459	11.9649	750	12.5	0.0898241		0.0890991	0.0926032	0.116637	0.0734331	0.0749861	0.140142		0.146401	0.0674125	0.145082	0.219637	0.0221545	0.0938821	0.138595	0.0485074	0.0908675	0.0815634	0.116624	0.0944551
20220216_WT_DYN	20220216	WT	WT_L	TAUb	DYN	M	58.4286	0.0459	11.9649	780	13	0.0726237		0.106477	0.112265	0.0816968	0.141232	0.10133	0.12158		0.0817248	0.108158	0.151661	0.0510281	0.0525275	0.0997119	0.119459	0.0932079	0.167542	0.10907	0.0879597	0.09671
20220216_WT_DYN	20220216	WT	WT_L	TAUb	DYN	M	58.4286	0.0459	11.9649	810	13.5	0.102626		0.108024	0.100903	0.0818321	0.0901707	0.0902862	0.0811421		0.11743	0.0587555	0.144912	0.0793355	0.0607923	0.0895814	0.182736	0.0806735	0.104495	0.0679613	0.132572	0.0907309
20220216_WT_DYN	20220216	WT	WT_L	TAUb	DYN	M	58.4286	0.0459	11.9649	840	14	0.0967978		0.204219	0.111046	0.0983398	0.0909413	0.0841394	0.155891		0.123772	0.0912632	0.09936	0.126987	0.0797217	0.111957	0.140057	0.107761	0.122203	0.0828111	0.112066	0.107969
20220216_WT_DYN	20220216	WT	WT_L	TAUb	DYN	M	58.4286	0.0459	11.9649	870	14.5	0.160249		0.108082	0.0985664	0.115802	0.0605372	0.0874124	0.0907992		0.124769	0.11429	0.108592	0.0388062	0.10756	0.113629	0.133345	0.0610916	0.0683957	0.0971899	0.0797832	0.0955091
20220216_WT_DYN	20220216	WT	WT_L	TAUb	DYN	M	58.4286	0.0459	11.9649	900	15	0.0930805		0.0924262	0.0902621	0.0552143	0.0377546	0.0815069	0.0801824		0.0363035	0.0696799	0.130106	0.092128	0.0395117	0.0941215	0.10799	0.082346	0.0686214	0.0620672	0.0710952	0.0797184
20220216_WT_DYN	20220216	WT	WT_L	TAUb	DYN	M	58.4286	0.0459	11.9649	930	15.5	0.0675114		0.10708	0.090496	0.087219	0.0689994	0.0848961	0.0831146		0.0395239	0.0816268	0.0891203	0.062951	0.010584	0.104019	0.137784	0.0866535	0.0930585	0.06265	0.0947852	0.0837138
20220216_WT_DYN	20220216	WT	WT_L	TAUb	DYN	M	58.4286	0.0459	11.9649	960	16	0.0940941		0.0618948	0.0969388	0.0920336	0.122837	0.0925179	0.0622011		0.081626	0.0657295	0.0589848	0.0861516	0.200223	0.0974135	0.120849	0.130498	0.163736	0.0799089	0.0622561	0.087827
20220216_WT_DYN	20220216	WT	WT_L	TAUb	DYN	M	58.4286	0.0459	11.9649	990	16.5	0.148559		0.0728138	0.0622554	0.0454381	0.169825	0.118267	0.0789621		0.224638	0.0840377	0.148073	0.116766	0.0467749	0.0950347	0.116737	0.066937	0.140055	0.102853	0.0834609	0.0920084
20220216_WT_DYN	20220216	WT	WT_L	TAUb	DYN	M	58.4286	0.0459	11.9649	1020	17	0.0759143		0.124019	0.0950044	0.0676381	0.0535079	0.092183	0.108694		0.028388	0.0801475	0.0586061	0.165472	0.0384542	0.079602	0.0985754	0.0398981	0.118428	0.0688761	0.0867726	0.0794614
20220216_WT_DYN	20220216	WT	WT_L	TAUb	DYN	M	58.4286	0.0459	11.9649	1050	17.5	0.164979		0.102132	0.0847992	0.0684043	0.0542473	0.0605545	0.0765287		0.0494252	0.062201	0.0490313	0.122159	0.0736218	0.0946514	0.109783	0.0702742	0.078169	0.035792	0.0838809	0.0744789
20220216_WT_DYN	20220216	WT	WT_L	TAUb	DYN	M	58.4286	0.0459	11.9649	1080	18	0.0660878		0.128624	0.0716987	0.0469676	0.0494478	0.116446	0.0560036		0.0417838	0.0855386	0.0884358	0.101352	-0.000215272	0.0771861	0.125406	0.086821	0.0838681	0.0821054	0.0746773	0.0803113
20220216_WT_DYN	20220216	WT	WT_L	TAUb	DYN	M	58.4286	0.0459	11.9649	1110	18.5	0.0963283		0.0720922	0.0982713	0.0645021	0.111032	0.0937771	0.0595451		0.0611343	0.0861406	0.158723	0.0807361	0.0399492	0.115787	0.0967018	0.047734	0.155948	0.0534268	0.0565085	0.0854041
20220216_WT_DYN	20220216	WT	WT_L	TAUb	DYN	M	58.4286	0.0459	11.9649	1140	19	0.0806116		0.0692161	0.0734989	0.078368	0.0710501	0.072629	0.0498163		0.0699986	0.0687116	0.153814	0.0429942	0.0165332	0.08044	0.12062	0.0747728	0.0903727	0.10094	0.085099	0.0729571
20220216_WT_DYN	20220216	WT	WT_L	TAUb	DYN	M	58.4286	0.0459	11.9649	1170	19.5	0.0559978		0.08421	0.083876	0.056135	0.0348592	0.0812572	0.0727224		0.039748	0.0876577	0.0779379	0.139766	0.0527428	0.0840488	0.157999	0.107763	0.100334	0.0862316	0.0678785	0.0786998
20220216_WT_DYN	20220216	WT	WT_L	TAUb	DYN	M	58.4286	0.0459	11.9649	1200	20	0.0900318		0.102317	0.0939681	0.110411	0.0867402	0.0592524	0.0361451		0.035785	0.0801189	0.145241	0.0649308	0.0208314	0.101603	0.143413	0.118174	0.0888851	0.0516106	0.0737761	0.0889967
20220216_WT_DYN	20220216	WT	WT_L	TAUb	DYN	M	58.4286	0.0459	11.9649	1230	20.5	0.116572		0.0788475	0.0748273	0.0772057	0.0811423	0.143523	0.0765736		0.0616313	0.0547569	0.0799451	0.163578	0.0238017	0.104463	0.125026	0.0358418	0.105722	0.0636264	0.0445222	0.0822298
20220216_WT_DYN	20220216	WT	WT_L	TAUb	DYN	M	58.4286	0.0459	11.9649	1260	21	0.0808562		0.0708535	0.058979	0.0696979	0.0924363	0.0731273	0.0811376		0.112763	0.0468792	0.111296	0.161385	0.150452	0.0841242	0.12	0.0392592	0.150659	0.0626441	0.0731599	0.0776329
20220216_WT_DYN	20220216	WT	WT_L	TAUb	DYN	M	58.4286	0.0459	11.9649	1290	21.5	0.087102		0.0887105	0.0890684	0.0713834	0.123684	0.0936448	0.0919914		0.0497017	0.0725616	0.0850888	0.157905	0.165555	0.0823578	0.128296	0.0921948	0.130962	0.0721708	0.0407255	0.0835573
20220216_WT_DYN	20220216	WT	WT_L	TAUb	DYN	M	58.4286	0.0459	11.9649	1320	22	0.0715972		0.066522	0.0907328	0.0533246	0.0861407	0.0663911	0.0722538		0.020567	0.0729023	0.105672	0.127598	0.0507261	0.0816245	0.11575	0.0742548	0.0953479	0.0577999	0.054738	0.0725911
20220216_WT_DYN	20220216	WT	WT_L	TAUb	DYN	M	58.4286	0.0459	11.9649	1350	22.5	0.117261		0.0769613	0.0891916	0.0469265	0.0509189	0.0898244	0.056		0.0482778	0.0674375	0.0623894	0.194501	0.0156569	0.083312	0.104002	0.0419728	0.102538	0.0280965	0.0349301	0.0685983
20220216_WT_DYN	20220216	WT	WT_L	TAUb	DYN	M	58.4286	0.0459	11.9649	1380	23	0.0466219		0.114443	0.0973453	0.0787215	0.0461986	0.0829525	0.0625437		0.0282514	0.0463684	0.089532	0.0693783	0.190017	0.0972936	0.130822	0.0582847	0.0819512	0.0693491	0.113307	0.0787118
20220216_WT_DYN	20220216	WT	WT_L	TAUb	DYN	M	58.4286	0.0459	11.9649	1410	23.5	0.0962418		0.104811	0.0609659	0.0554671	0.125696	0.0863836	0.0453917		0.0608763	0.030575	0.0708562	0.0934736	0.0661248	0.0940101	0.0543306	0.0923296	0.0889982	0.0663675	0.0161804	0.0713504
20220216_WT_DYN	20220216	WT	WT_L	TAUb	DYN	M	58.4286	0.0459	11.9649	1440	24	0.0861447		0.0914501	0.0703562	0.0793779	0.0357151	0.0718362	0.0906835		0.00923383	0.0669383	0.0596285	0.12961	0.0250885	0.0994494	0.122339	0.092808	0.100831	0.0223199	0.0370109	0.0676109
20220216_WT_DYN	20220216	WT	WT_L	TAUb	DYN	M	58.4286	0.0459	11.9649	1470	24.5	0.105612		0.104356	0.126706	0.0559635	0.0170538	0.0560775	0.0827706		0.0554711	0.0526239	0.0759305	0.0790485	0.0392777	0.0815148	0.168182	0.0673694	0.043701	0.020855	0.0858584	0.0723257
20220216_WT_DYN	20220216	WT	WT_L	TAUb	DYN	M	58.4286	0.0459	11.9649	1500	25	0.0640761		0.0478892	0.0828741	0.0544322	0.0688726	0.0782246	0.0707203		0.0212466	0.0707868	0.0611983	0.0908229	0.0159361	0.101808	0.127127	0.0585401	0.0631736	0.0423964	0.0844312	0.0716593
20220216_WT_DYN	20220216	WT	WT_L	TAUb	DYN	M	58.4286	0.0459	11.9649	1530	25.5	0.0765027		0.110376	0.0717095	0.0512163	0.0968586	0.0678219	0.0989078		0.0264028	0.0653151	0.0823404	0.113436	0.0422398	0.0827901	0.130381	0.0668324	0.0941289	0.0408661	0.0566274	0.0654523
20220216_WT_DYN	20220216	WT	WT_L	TAUb	DYN	M	58.4286	0.0459	11.9649	1560	26	0.106756		0.115605	0.0586963	0.0850202	0.0587235	0.0804643	0.0633038		0.0331558	0.0583989	0.0966998	0.0981442	0.224401	0.0763614	0.0973792	0.0605796	0.0501939	0.103408	0.132222	0.0770081
20220216_WT_DYN	20220216	WT	WT_L	TAUb	DYN	M	58.4286	0.0459	11.9649	1590	26.5	0.0858316		0.104755	0.0774059	0.0887582	0.0313748	0.0979295	0.0810574		0.0440712	0.0671347	0.0848185	0.101103	0.0547972	0.0831826	0.152385	0.0565677	0.0692529	0.069704	0.142213	0.085374
20220216_WT_DYN	20220216	WT	WT_L	TAUb	DYN	M	58.4286	0.0459	11.9649	1620	27	0.0891855		0.0591298	0.0756711	0.101719	0.0804433	0.0869338	0.0751038		0.0291884	0.0628031	0.0659799	0.0993367	0.0630526	0.085215	0.117632	0.0607774	0.0816495	0.0520532	0.0779335	0.0721923
20220216_WT_DYN	20220216	WT	WT_L	TAUb	DYN	M	58.4286	0.0459	11.9649	1650	27.5	0.071394		0.0812597	0.0758631	0.0268506	0.0203846	0.0646739	0.12061		0.074728	0.0891304	0.074776	0.102259	0.021618	0.0748494	0.0820553	0.0779228	0.0527477	0.0847771	0.0716146	0.0752959
20220216_WT_DYN	20220216	WT	WT_L	TAUb	DYN	M	58.4286	0.0459	11.9649	1680	28	0.0937755		0.101162	0.0752054	0.0701304	0.079851	0.0756219	0.072695		0.0396624	0.0533335	0.086553	0.150502	0.066641	0.0949182	0.101296	0.0636268	0.104139	0.0525564	0.120456	0.0741938
20220216_WT_DYN	20220216	WT	WT_L	TAUb	DYN	M	58.4286	0.0459	11.9649	1710	28.5	0.0665405		0.0909439	0.0648775	0.0538342	0.0165491	0.084477	0.038103		0.00323068	0.0792277	0.074517	0.0647733	0.103171	0.0903798	0.0855489	0.0601509	0.0314073	0.0180152	0.0279019	0.0562283
20220216_WT_DYN	20220216	WT	WT_L	TAUb	DYN	M	58.4286	0.0459	11.9649	1740	29	0.0783939		0.120584	0.0552761	0.0604936	0.106128	0.0588371	0.119713		0.0488523	0.0553935	0.13738	0.0431291	0.030602	0.0782774	0.104133	0.0636995	0.112399	0.0311713	0.120914	0.0680762
20220216_WT_DYN	20220216	WT	WT_L	TAUb	DYN	M	58.4286	0.0459	11.9649	1770	29.5	0.0665473		0.034232	0.0776517	0.0665871	0.102529	0.100005	0.0186817		0.0525872	0.0313181	0.049684	0.156577	0.137433	0.0818191	0.0629287	0.0517879	0.110238	0.0430627	0.0351393	0.0618763
20220217_PS19_DYN	20220217	PS19	PS19_F1	TAUs	DYN	F	52.1429	0.0262	9.58277	0	0	0.0510694	-0.0103707	-0.00799696	0.0108637	0.0222372	-0.0575893	-0.00389053	-0.00373045	-0.00210346	0.0149145	0.00851101	0.039135	0.0352216	0.0248413	0.0015698	0.0324598	0.030626	-0.0238825	-0.00723486	-0.0270765	0
20220217_PS19_DYN	20220217	PS19	PS19_F1	TAUs	DYN	F	52.1429	0.0262	9.58277	30	0.5	0.0629496	0.00924368	-0.0132919	0.035833	-0.0110913	0.0156713	0.00927947	-0.00745369	-0.0425532	-0.0180256	-0.016132	0.0498722	0.0380893	-0.00839288	0.00410299	0.0523831	-0.0179608	0.00139553	0.0226378	-0.015377	0.0130144
20220217_PS19_DYN	20220217	PS19	PS19_F1	TAUs	DYN	F	52.1429	0.0262	9.58277	60	1	0.05264	-0.0238028	0.025992	0.02468	-0.00160945	-0.0571022	-0.0426179	-0.0168602	0.122628	-0.00153484	-0.0396774	0.0367594	-0.0298049	-0.0222325	0.0133206	0.0503544	0.0075785	-0.00261177	0.010597	0.0210512	-0.000969553
20220217_PS19_DYN	20220217	PS19	PS19_F1	TAUs	DYN	F	52.1429	0.0262	9.58277	90	1.5	0.082388	0.0433587	0.0628751	-0.0181929	0.00223558	-0.0193834	0.0111817	0.0177445	-0.0497755	-0.0495853	0.000928751	-0.0180117	0.0420344	-0.0212451	0.0221825	0.0705977	-0.02571	0.0456892	-0.00338222	0.0301712	-0.00770905
20220217_PS19_DYN	20220217	PS19	PS19_F1	TAUs	DYN	F	52.1429	0.0262	9.58277	120	2	0.0208612	-0.0340846	-0.0036693	0.00164451	-0.0187873	-0.0270764	-0.0112222	-0.00547107	0.0988724	-0.00162813	-0.0102627	0.0062268	-0.04687	-0.0176161	-0.00104876	0.0747511	-0.00535879	-0.0844079	0.00270413	0.021185	-0.00228024
20220217_PS19_DYN	20220217	PS19	PS19_F1	TAUs	DYN	F	52.1429	0.0262	9.58277	150	2.5	0.0106705	0.0315014	0.0428902	0.0049829	0.0220875	-0.0263922	-0.0115052	0.00644657	0.0433817	0.0225765	-0.0179523	0.0390092	-0.0152008	-0.0296549	0.00611128	0.0411807	-0.0224021	0.066526	-0.01213	0.0607755	0.00758768
20220217_PS19_DYN	20220217	PS19	PS19_F1	TAUs	DYN	F	52.1429	0.0262	9.58277	180	3	0.053155	0.0214226	0.0296702	0.00288414	0.0249571	-0.045238	-0.00371385	0.0216826	-0.0303519	-0.00858468	0.00310359	0.0673382	0.0390765	-0.0024901	0.0224908	0.0555504	0.0168052	0.0196847	-0.0175235	0.0362815	0.011995
20220217_PS19_DYN	20220217	PS19	PS19_F1	TAUs	DYN	F	52.1429	0.0262	9.58277	210	3.5	-0.00227022	0.0131253	0.0385428	0.0101785	0.0149094	0.00876866	-0.0100357	-0.0483722	0.00616461	0.032386	-0.0276651	-0.0160198	0.012061	0.0136874	-0.000390284	0.0430467	-0.0332817	0.0147516	-0.00692691	-0.0364862	-0.018028
20220217_PS19_DYN	20220217	PS19	PS19_F1	TAUs	DYN	F	52.1429	0.0262	9.58277	240	4	0.0264599	0.298272	0.0384162	0.0114946	0.0398467	0.000122512	-0.0240413	0.00831566	0.0277078	0.0463444	0.00989203	0.100584	0.114696	-0.0318535	0.0136193	0.0821583	-0.0113304	0.0878058	0.0457761	0.0383063	0.0207361
20220217_PS19_DYN	20220217	PS19	PS19_F1	TAUs	DYN	F	52.1429	0.0262	9.58277	270	4.5	0.0220864	-0.0609233	-0.0149024	-0.00311987	0.0172204	0.0306635	-0.00169033	0.0119467	-0.0697395	-0.00726106	-0.00779754	0.0455818	0.014344	0.0611958	0.00562917	0.0309509	-0.0218967	0.0394632	-0.0253477	0.0312377	-0.00965462
20220217_PS19_DYN	20220217	PS19	PS19_F1	TAUs	DYN	F	52.1429	0.0262	9.58277	300	5	0.046598	0.0619392	0.053868	0.0333914	0.0312567	-0.0671985	-0.0372062	0.0287693	0.0177036	0.0468312	0.0222071	0.0742656	0.0706049	0.0608424	0.0308487	0.0499462	0.0158936	0.00370634	-0.00975606	-0.0251451	0.00907849
20220217_PS19_DYN	20220217	PS19	PS19_F1	TAUs	DYN	F	52.1429	0.0262	9.58277	330	5.5	0.034663	0.07723	0.0634349	0.0222716	-0.0182441	0.00846655	0.0127428	0.0192353	0.0422839	0.0253838	0.0113398	0.024391	0.0717999	-0.0352296	0.0241939	0.0361649	-0.0158435	0.0154048	0.0165548	-0.00760542	0.00246432
20220217_PS19_DYN	20220217	PS19	PS19_F1	TAUs	DYN	F	52.1429	0.0262	9.58277	360	6	0.0350388	0.205742	0.047913	-0.0177772	0.00842231	-0.0525318	0.00634462	-0.00845956	0.0790732	0.0109116	0.000500586	0.00555122	0.0270673	-0.0112577	0.0229438	0.0387817	0.00467642	0.0239094	-0.0176317	0.0292368	-0.00355972
20220217_PS19_DYN	20220217	PS19	PS19_F1	TAUs	DYN	F	52.1429	0.0262	9.58277	390	6.5	0.124169	-0.0654087	-0.0051314	0.0276687	0.0372344	0.0210705	0.031401	0.00877899	0.100248	0.0313257	-0.027053	0.0225731	-0.000361378	0.142486	0.0172408	0.0885191	0.0128951	-0.00966537	0.0236658	-0.0152493	0.0220457
20220217_PS19_DYN	20220217	PS19	PS19_F1	TAUs	DYN	F	52.1429	0.0262	9.58277	420	7	0.0444827	0.0297647	0.00529889	-0.0128494	0.0189948	0.0216352	-0.00603323	-0.0265072	0.00964106	-0.030819	0.00899688	0.057757	0.0413917	-0.0169517	0.0122417	0.0409441	0.0265581	0.0259278	0.0346052	0.101595	0.0160098
20220217_PS19_DYN	20220217	PS19	PS19_F1	TAUs	DYN	F	52.1429	0.0262	9.58277	450	7.5	0.00962447	-0.0420244	0.0411708	0.0502513	-0.00130223	0.0582679	0.00556186	-0.0154384	0.072483	-0.0378485	0.00477127	0.0315556	0.0513003	0.0268719	0.021612	0.0362863	-0.0112237	0.0086067	0.0176007	-0.00112921	0.00838328
20220217_PS19_DYN	20220217	PS19	PS19_F1	TAUs	DYN	F	52.1429	0.0262	9.58277	480	8	0.0365512	-0.0298648	-0.0154616	0.0139295	-0.0168144	-0.0185301	-0.0118252	-0.0101107	0.0657219	-0.0438233	0.0354317	-0.0374416	0.082461	0.00678792	0.0089518	0.0906842	0.0215066	0.0620962	0.0111303	0.0102349	0.0135916
20220217_PS19_DYN	20220217	PS19	PS19_F1	TAUs	DYN	F	52.1429	0.0262	9.58277	510	8.5	0.0226812	0.0455026	0.0637115	0.00668033	0.00606787	-0.047709	-0.0248466	0.00365573	0.021929	0.00612913	0.017316	0.0367227	0.0247625	-0.0652938	0.00172372	0.106895	-0.00109227	0.0706876	0.0202447	0.0399021	0.00506618
20220217_PS19_DYN	20220217	PS19	PS19_F1	TAUs	DYN	F	52.1429	0.0262	9.58277	540	9	-0.000392684	-0.0310684	-0.0153934	0.0100256	0.00848742	0.0423418	-0.00873683	0.0113334	-0.0426734	0.0774845	-0.0306913	0.0157196	-0.0248979	0.00665434	0.0268657	0.0228333	-0.00616878	0.0712612	0.0112407	-0.0011097	-0.00489347
20220217_PS19_DYN	20220217	PS19	PS19_F1	TAUs	DYN	F	52.1429	0.0262	9.58277	570	9.5	0.0373453	0.0390982	0.0990581	0.0213256	0.0242901	-0.0623998	0.0328851	-0.0062818	-0.084013	0.0115645	0.0259108	0.0780534	0.136705	-0.0133382	0.0110796	0.0488905	0.0287974	-0.026892	0.0229849	0.00925025	0.0231618
20220217_PS19_DYN	20220217	PS19	PS19_F1	TAUs	DYN	F	52.1429	0.0262	9.58277	600	10	0.0559917	-0.0116869	0.0159219	0.0116575	-0.00316401	0.0961687	0.0148688	-0.0314186	-0.0383823	-0.0315361	-0.00167582	0.0362633	0.109207	0.0589508	0.0339082	0.0432872	0.00102423	0.0934864	-0.0158623	0.011341	0.00408744
20220217_PS19_DYN	20220217	PS19	PS19_F1	TAUs	DYN	F	52.1429	0.0262	9.58277	630	10.5	-0.0136226	0.161058	0.022921	0.0236014	-0.00710964	0.0775123	0.0208822	-0.00424491	-0.0604801	-0.0131324	0.00476752	-0.00147734	0.0334032	0.0327638	0.0204234	0.0622962	0.0208913	0.0304576	-0.00459617	0.00408744	0.00908423
20220217_PS19_DYN	20220217	PS19	PS19_F1	TAUs	DYN	F	52.1429	0.0262	9.58277	660	11	0.014355	0.0785914	0.0237769	0.0190486	0.0586036	-0.0209486	-0.010166	-0.0022649	0.0663809	0.0505858	-0.000321097	0.0752015	-0.0146649	-0.0889521	0.0235524	0.0621501	-0.00728746	-0.0275778	0.0248844	0.00221512	0.0115428
20220217_PS19_DYN	20220217	PS19	PS19_F1	TAUs	DYN	F	52.1429	0.0262	9.58277	690	11.5	0.0626853	-0.0643898	-0.010919	0.028797	0.0303404	-0.00123232	0.0402753	-0.035181	0.0376841	-0.0389767	0.0115108	-0.010148	0.0348026	0.0392809	0.0393783	0.0604506	-0.000253685	-0.0429711	-0.00877596	0.00795595	0.00437796
20220217_PS19_DYN	20220217	PS19	PS19_F1	TAUs	DYN	F	52.1429	0.0262	9.58277	720	12	0.0243138	-0.101292	-0.0500789	0.0166038	-0.0157183	0.0118048	-0.000996163	-0.0266723	-0.0755011	-0.0219705	-0.00865376	-0.0054813	0.0615033	0.0584584	0.00873892	0.0620224	-0.0146097	0.0415913	0.028356	-0.0339556	-0.0102925
20220217_PS19_DYN	20220217	PS19	PS19_F1	TAUs	DYN	F	52.1429	0.0262	9.58277	750	12.5	0.0356062	-0.0622269	-0.00836533	0.0333394	0.0106463	0.0518714	-0.000137852	-0.0394051	0.121643	-0.00396806	-0.000537945	0.0268567	0.00466755	0.00847647	0.0239906	0.0269471	-0.0112511	-0.0176849	0.0177071	0.0532741	0.0174674
20220217_PS19_DYN	20220217	PS19	PS19_F1	TAUs	DYN	F	52.1429	0.0262	9.58277	780	13	0.0486467	0.0675707	0.0242665	0.0124506	0.0664789	-0.0429387	0.0167931	0.0292484	0.16361	0.0527791	0.0365986	0.0473823	0.103676	0.145027	0.0232008	0.050321	-0.0106924	0.0113176	0.0233881	0.0935036	0.0310939
20220217_PS19_DYN	20220217	PS19	PS19_F1	TAUs	DYN	F	52.1429	0.0262	9.58277	810	13.5	0.108544	-0.0141787	0.0501525	0.017519	0.0272397	-0.0395891	-0.00488794	-0.0233301	0.00739661	-0.0173114	0.00281631	0.081648	0.0991122	-0.00598773	0.0141656	0.0388596	0.0226529	-0.00491372	-0.0176016	-0.029466	-0.00536067
20220217_PS19_DYN	20220217	PS19	PS19_F1	TAUs	DYN	F	52.1429	0.0262	9.58277	840	14	0.0432721	-0.00828153	0.0246881	0.0308921	0.00784126	-0.0027923	0.0166516	0.0257093	-0.0455962	-0.0726137	0.0425319	0.0801465	-0.00221992	-0.021804	0.0360759	0.0589841	0.0319745	0.068316	-0.0214096	0.0186466	0.0184479
20220217_PS19_DYN	20220217	PS19	PS19_F1	TAUs	DYN	F	52.1429	0.0262	9.58277	870	14.5	0.0533177	0.0255449	0.0075114	0.0157044	0.0271265	0.0556394	0.00922322	0.102183	0.0113207	-0.0290571	-0.000816361	-0.0116966	0.0127263	0.0327804	0.0267556	0.0738197	0.0292146	0.060901	0.00936473	0.0328028	0.0275782
20220217_PS19_DYN	20220217	PS19	PS19_F1	TAUs	DYN	F	52.1429	0.0262	9.58277	900	15	0.0301274	-0.083874	0.0143379	0.0213228	0.0362448	0.00987387	0.0468995	0.00717987	0.190316	0.0353286	0.0133595	0.0739128	0.0704151	0.192678	0.0217047	0.0280571	-0.0118255	0.0126472	0.0110394	0.048712	0.0278455
20220217_PS19_DYN	20220217	PS19	PS19_F1	TAUs	DYN	F	52.1429	0.0262	9.58277	930	15.5	0.0416707	-0.0592671	0.0307303	0.0149411	0.0105926	0.162265	0.0266528	0.0469279	0.0348874	-0.0627434	-0.00541096	0.00756744	0.0262286	-0.0668551	0.0349665	0.0310444	0.0332417	0.0689579	-0.00320054	0.075323	0.0129343
20220217_PS19_DYN	20220217	PS19	PS19_F1	TAUs	DYN	F	52.1429	0.0262	9.58277	960	16	-0.000341864	0.0601495	0.0743099	0.0125482	0.0470574	0.0260502	0.0132677	0.0370109	-0.0526469	0.0286305	0.0324739	0.0464969	0.0369384	0.112698	0.0233168	0.0551803	0.00248561	0.00300581	0.00933947	-0.00927018	0.0206831
20220217_PS19_DYN	20220217	PS19	PS19_F1	TAUs	DYN	F	52.1429	0.0262	9.58277	990	16.5	0.0448027	0.142488	0.118453	0.00668711	0.0149655	-0.0170902	0.0161622	0.00501494	0.0302194	0.0804207	0.050945	0.0796988	0.0086594	0.0431421	0.023841	0.104701	0.10953	-0.00591687	0.0045226	0.0249969	0.0320008
20220217_PS19_DYN	20220217	PS19	PS19_F1	TAUs	DYN	F	52.1429	0.0262	9.58277	1020	17	0.0804113	0.141461	0.0586699	0.0221007	0.0657417	-0.0329323	0.030126	0.00378158	-0.0239332	0.240348	0.0374749	0.0765642	0.0102025	-0.0256573	0.0331192	0.0471229	0.058615	0.0494882	0.0560411	-0.0567129	0.0500181
20220217_PS19_DYN	20220217	PS19	PS19_F1	TAUs	DYN	F	52.1429	0.0262	9.58277	1050	17.5	0.0196733	-0.0476156	0.0831335	0.00202718	0.0216846	0.0212202	0.046087	-0.00866608	0.044436	0.0320522	0.017821	0.030692	-4.09068e-05	0.0403458	0.0158813	0.0559971	0.0211977	-0.00446698	-0.00827767	0.0212438	0.0146396
20220217_PS19_DYN	20220217	PS19	PS19_F1	TAUs	DYN	F	52.1429	0.0262	9.58277	1080	18	0.0302042	0.142673	0.0180553	0.0226133	0.0496111	-0.000154131	0.0075066	0.0455339	0.0238344	0.0148457	0.0427329	0.0132613	0.030088	0.00718957	0.0383567	0.061902	0.0473855	0.0144229	0.00463801	0.0647361	0.028514
20220217_PS19_DYN	20220217	PS19	PS19_F1	TAUs	DYN	F	52.1429	0.0262	9.58277	1110	18.5	0.0597571	0.484752	0.0721217	0.0438851	0.0245999	-0.00322183	0.000297513	-0.016623	-0.0421599	0.0126932	-0.0114767	0.0375816	0.0322727	-0.00612673	0.0285385	0.0740858	0.0179359	0.00397286	0.0160443	-0.0248271	0.0312808
20220217_PS19_DYN	20220217	PS19	PS19_F1	TAUs	DYN	F	52.1429	0.0262	9.58277	1140	19	0.0162073	0.00417061	0.0504987	0.0358891	0.00950769	-0.0379816	-0.00888282	0.0577615	-0.0713244	-0.0181092	0.030044	0.0545375	0.0463004	-0.0622358	0.019356	0.0080242	0.00141285	0.0112555	0.00422592	0.0050906	0.0230691
20220217_PS19_DYN	20220217	PS19	PS19_F1	TAUs	DYN	F	52.1429	0.0262	9.58277	1170	19.5	0.017261	0.0432452	0.0544868	0.0175045	0.0220457	-0.0192914	0.0196743	0.0110986	-0.00215481	0.0862588	0.0211426	0.0691061	0.0207804	0.0349249	0.0182504	-0.0170096	0.040424	0.0554226	0.0160951	0.0251356	0.0269284
20220217_PS19_DYN	20220217	PS19	PS19_F1	TAUs	DYN	F	52.1429	0.0262	9.58277	1200	20	-0.00723726	0.0332044	-0.00164587	-0.0104362	0.0247437	-0.00785306	0.00565985	0.0449616	-0.00200474	0.0274268	0.0247363	-0.00579342	0.0733786	-0.0303213	0.0326834	0.108714	-0.0238359	0.0527168	0.0318595	0.0239402	0.0162888
20220217_PS19_DYN	20220217	PS19	PS19_F1	TAUs	DYN	F	52.1429	0.0262	9.58277	1230	20.5	0.026509	0.000395919	0.0560701	-0.00238407	0.081465	0.133584	0.0298353	0.0282094	0.016871	0.0387816	0.0399802	0.0907937	0.00910844	-0.0438254	0.050944	0.0503963	-0.0399977	0.046918	0.0187153	0.0201226	0.0296729
20220217_PS19_DYN	20220217	PS19	PS19_F1	TAUs	DYN	F	52.1429	0.0262	9.58277	1260	21	0.0364131	-0.020825	0.0385254	0.0355537	0.00129816	-0.0368706	-0.0090812	-0.00406855	0.0602499	0.0121404	0.0373274	0.0444652	0.0240633	0.0146733	0.0176161	0.0138693	0.020777	0.0649126	0.0224214	0.0144127	0.01754
20220217_PS19_DYN	20220217	PS19	PS19_F1	TAUs	DYN	F	52.1429	0.0262	9.58277	1290	21.5	0.0960261	0.0488073	0.0476263	0.0193907	0.0281447	-0.036812	-0.00856924	-0.0125869	-0.0423284	0.030095	0.0254965	0.0420605	-0.0101889	0.110362	0.0280289	0.0777565	0.00262909	-0.0169752	0.050635	-0.0348492	0.0191806
20220217_PS19_DYN	20220217	PS19	PS19_F1	TAUs	DYN	F	52.1429	0.0262	9.58277	1320	22	0.0325981	-0.116175	-0.00692389	0.0352927	0.00201487	0.00131319	0.0212777	0.0349183	-0.0689376	0.0133773	0.0250821	0.0380848	-0.000951291	0.0309836	0.0161238	0.0721567	0.0555586	-0.0123174	0.0183636	-0.0342203	0.0198727
20220217_PS19_DYN	20220217	PS19	PS19_F1	TAUs	DYN	F	52.1429	0.0262	9.58277	1350	22.5	0.0326413	-0.0842939	0.0155564	0.0160012	0.0054646	-0.0737404	0.00278124	-0.00703565	0.0184163	0.0566818	-0.00585363	0.0561082	0.0360358	-0.0523972	0.0443212	0.0715567	0.0355742	0.0323897	0.00704963	0.0465914	0.0151441
20220217_PS19_DYN	20220217	PS19	PS19_F1	TAUs	DYN	F	52.1429	0.0262	9.58277	1380	23	0.0297343	-0.0971731	-0.00805102	0.0554639	0.0609589	-0.0742999	0.0209045	0.0121619	-0.0199716	0.00667573	0.0545878	0.0539433	0.103779	0.0152827	0.0239263	0.0751944	0.0111014	-0.0209858	0.0216398	0.0217987	0.024771
20220217_PS19_DYN	20220217	PS19	PS19_F1	TAUs	DYN	F	52.1429	0.0262	9.58277	1410	23.5	0.0150101	0.165915	0.0425676	0.0361646	-0.0099082	0.00156844	-0.00377448	-0.0160073	-0.0777941	-0.00320502	-0.0115048	0.076711	0.0687013	-0.00739244	0.0218362	0.031872	0.0746469	0.0269263	0.0127454	0.00794478	0.0109945
20220217_PS19_DYN	20220217	PS19	PS19_F1	TAUs	DYN	F	52.1429	0.0262	9.58277	1440	24	0.016146	-0.0267604	0.0361054	0.0385959	0.0159075	-0.0725744	0.0101109	0.0542643	0.0236603	0.066376	0.0062818	0.0255218	-0.0238131	-0.0453926	0.0513873	0.058408	0.0553972	0.0197088	-0.0304008	0.080122	0.0264313
20220217_PS19_DYN	20220217	PS19	PS19_F1	TAUs	DYN	F	52.1429	0.0262	9.58277	1470	24.5	0.00967664	-0.0353653	0.000623724	0.0152513	0.0447966	0.0899183	0.0285878	-0.0209634	0.055516	-0.0498104	0.0343634	-0.00133646	0.0086715	0.0637795	0.0226909	0.074695	0.0604807	-0.0175409	0.0600402	0.0270407	0.0346999
20220217_PS19_DYN	20220217	PS19	PS19_F1	TAUs	DYN	F	52.1429	0.0262	9.58277	1500	25	0.0578763	0.0313031	0.0548019	0.0423331	0.0333659	0.0199044	0.0471756	-0.00676214	0.103913	0.0972155	0.00477253	-0.0246731	0.0657972	-0.0314746	0.0302051	0.104769	0.139397	0.0336028	0.0495547	0.0887893	0.0509139
20220217_PS19_DYN	20220217	PS19	PS19_F1	TAUs	DYN	F	52.1429	0.0262	9.58277	1530	25.5	0.090356	0.0743486	0.0481309	0.0342953	0.00903205	0.0409879	0.00867704	-0.0416639	0.00427643	0.0170646	-0.00252328	0.00452636	0.000621428	0.0144111	0.0133437	0.0733486	0.0267349	0.120989	0.0150198	-0.0199369	0.0169521
20220217_PS19_DYN	20220217	PS19	PS19_F1	TAUs	DYN	F	52.1429	0.0262	9.58277	1560	26	-0.0204123	-0.0127402	0.0329622	0.0418634	0.0221773	0.0181292	0.0523498	0.0523324	0.025907	-0.0654894	0.0480412	0.0223597	0.0781675	-0.0135401	0.044024	0.0620719	0.0626958	0.0523781	0.0142505	0.0169516	0.0370357
20220217_PS19_DYN	20220217	PS19	PS19_F1	TAUs	DYN	F	52.1429	0.0262	9.58277	1590	26.5	0.0189394	0.0423078	0.0411871	0.034272	0.0192469	0.0946494	0.0472201	0.00060661	0.0922706	-0.0202413	0.00108758	0.124083	0.00829907	0.025058	0.0309945	0.0680679	0.0476202	0.00731125	0.0386959	0.0162839	0.02623
20220217_PS19_DYN	20220217	PS19	PS19_F1	TAUs	DYN	F	52.1429	0.0262	9.58277	1620	27	0.048993	-0.0582207	0.0130665	0.0777174	0.031937	0.0227421	0.0220438	0.0450527	0.0362995	0.0890573	0.0540761	0.0458126	0.00780349	0.0100146	0.0521583	0.0750421	0.0956905	0.0207629	0.0530858	0.00339359	0.0447679
20220217_PS19_DYN	20220217	PS19	PS19_F1	TAUs	DYN	F	52.1429	0.0262	9.58277	1650	27.5	0.0760429	0.0159221	0.0547492	0.0361825	0.0895381	-0.0363402	0.00377574	-0.0270857	-0.041449	0.133646	0.0360307	0.0285779	0.0134797	-0.0679384	0.0374138	0.10556	0.017713	0.0016034	0.0360345	-0.000849963	0.0291649
20220217_PS19_DYN	20220217	PS19	PS19_F1	TAUs	DYN	F	52.1429	0.0262	9.58277	1680	28	0.14841	-0.0623128	-0.0107441	0.0535748	0.0229829	-0.0360328	0.0449836	0.0492101	0.0378916	0.124509	0.0473286	0.046394	0.0432116	0.00114904	0.0379481	0.0693475	0.102927	-0.00717142	0.0474908	0.0955191	0.0431056
20220217_PS19_DYN	20220217	PS19	PS19_F1	TAUs	DYN	F	52.1429	0.0262	9.58277	1710	28.5	0.0157753	-0.0258225	-0.0059295	0.0386076	0.0267475	-0.031277	0.0110169	0.0457257	-0.00968791	0.0340536	0.0492206	0.0718032	0.0783763	0.0239833	0.0329329	0.131965	0.0676195	0.000175523	0.0258915	-0.0311566	0.0240074
20220217_PS19_DYN	20220217	PS19	PS19_F1	TAUs	DYN	F	52.1429	0.0262	9.58277	1740	29	0.0123184	0.0375304	0.0191227	0.034908	0.0578197	-0.101505	-0.00880633	0.012554	0.0910414	0.0139318	0.0356045	0.0393302	0.0133873	0.0489935	0.0403352	0.0484963	0.0426662	-0.0271902	0.0294055	-0.00731511	0.0266613
20220217_PS19_DYN	20220217	PS19	PS19_F1	TAUs	DYN	F	52.1429	0.0262	9.58277	1770	29.5	0.0610127	-0.0645579	0.0376775	0.05286	0.00588087	0.00400323	0.0543905	-0.0228488	0.0327065	0.00662335	0.038635	0.0847301	0.110477	0.0208667	0.0270121	0.0551256	0.0347171	0.0813711	0.0604685	0.10451	0.0322561
20220217_WT_DYN	20220217	WT	WT_R2	TAUs	DYN	F	52.1429	0.0275	9.64849	0	0	0.0400143		0.0528239	0.0338703	-0.0296165	-0.0729127	-0.00875961	-0.0180281	-0.0369714		0.0214026	0.0447828	-0.0320909	0.0645213	0.0359369	0.0660837	-0.0430081	-0.0285032	-0.0284135	0.0617427	0
20220217_WT_DYN	20220217	WT	WT_R2	TAUs	DYN	F	52.1429	0.0275	9.64849	30	0.5	0.00868893		-0.0428967	0.0258531	0.0213265	-0.0232652	-0.0268123	0.00135296	-0.0140584		-0.0311573	0.0565794	-0.0325391	0.0325247	0.0047537	0.0445445	-0.0264162	0.0858654	0.0044094	-0.0184078	-0.0156238
20220217_WT_DYN	20220217	WT	WT_R2	TAUs	DYN	F	52.1429	0.0275	9.64849	60	1	0.0498696		-0.017184	0.018091	-0.00668115	-0.0120711	-0.0187284	0.02717	-0.059005		0.00828855	0.0472716	-0.0157943	-0.04456	0.0243167	0.0793188	0.0281563	0.00224035	0.0264228	0.00613278	0.0116209
20220217_WT_DYN	20220217	WT	WT_R2	TAUs	DYN	F	52.1429	0.0275	9.64849	90	1.5	0.00488926		0.00547132	0.015591	0.0119405	-0.0583205	0.00720144	0.0219193	-0.00024408		-0.016655	0.128319	-0.0382566	0.0695042	0.0151314	0.0496696	0.018261	-0.0290526	-0.0421647	0.00986694	-0.00917833
20220217_WT_DYN	20220217	WT	WT_R2	TAUs	DYN	F	52.1429	0.0275	9.64849	120	2	-0.0282497		0.0697396	0.0220445	-0.0166954	-0.0472536	0.0100447	-0.0105156	0.0963021		-0.0186195	0.0571419	-0.0309524	-0.029208	0.00741277	0.0161194	0.0251354	0.0100772	-0.0509	-0.00883962	-0.0186476
20220217_WT_DYN	20220217	WT	WT_R2	TAUs	DYN	F	52.1429	0.0275	9.64849	150	2.5	0.0447416		0.0653838	0.0263585	0.00981563	0.098336	-0.0383762	-0.0460817	-0.0650224		-0.00730767	0.00912692	-0.0625948	-0.0535295	0.00330767	0.0916514	-0.0388125	0.0134685	0.0113009	0.022347	0.000887911
20220217_WT_DYN	20220217	WT	WT_R2	TAUs	DYN	F	52.1429	0.0275	9.64849	180	3	0.0328999		0.020993	0.0201847	0.0310258	-0.0547842	-0.0472431	-0.0452198	0.0375016		0.0338371	0.0438437	-0.0327843	0.106924	0.0156088	0.0794211	0.0684349	-0.0421262	0.0219062	-0.0411968	0.0103721
20220217_WT_DYN	20220217	WT	WT_R2	TAUs	DYN	F	52.1429	0.0275	9.64849	210	3.5	0.012662		0.0652226	0.0484455	-0.0179757	-0.11452	0.0260027	0.0595405	0.0352846		0.0425396	0.0586015	-0.0670784	-0.0616005	0.0131955	0.0291217	-0.0503344	-0.0198057	-0.0388511	-0.0155834	0.000164378
20220217_WT_DYN	20220217	WT	WT_R2	TAUs	DYN	F	52.1429	0.0275	9.64849	240	4	0.0879531		0.0412883	-0.00517148	0.0257324	-0.00536778	-0.00945464	0.0188694	0.00159745		0.0285349	0.0534582	-0.0358682	-0.0164452	0.0340795	0.0386359	0.045174	-0.00785989	-0.0284196	0.00706805	0.00176307
20220217_WT_DYN	20220217	WT	WT_R2	TAUs	DYN	F	52.1429	0.0275	9.64849	270	4.5	0.0280052		0.0552548	0.0334308	0.0401235	0.0142679	0.0104102	0.0132877	-0.055818		-0.00133638	0.0275236	-0.058331	0.0413762	0.0398551	0.0330456	-0.0156474	-0.0192338	-0.0107954	0.00114049	0.0112859
20220217_WT_DYN	20220217	WT	WT_R2	TAUs	DYN	F	52.1429	0.0275	9.64849	300	5	0.128049		-0.00253034	0.0199348	-0.00790963	0.136575	0.0201733	0.00634524	0.172034		0.0243041	-0.0319421	0.0623403	0.00734084	0.0381065	0.151105	-0.00259979	0.0171702	0.00251304	0.0391349	0.0129108
20220217_WT_DYN	20220217	WT	WT_R2	TAUs	DYN	F	52.1429	0.0275	9.64849	330	5.5	-0.0270707		0.0537114	0.0121073	-0.028739	-0.0067736	0.0317771	0.0072173	-0.0188065		-0.0129892	0.0631884	0.137038	-0.0668255	0.0390956	0.105036	-0.0196776	-0.0312868	-0.00171094	-0.00360233	0.00291828
20220217_WT_DYN	20220217	WT	WT_R2	TAUs	DYN	F	52.1429	0.0275	9.64849	360	6	0.0365135		0.0292012	0.0260667	-0.0202039	-0.0124676	0.00191408	0.0376436	0.0170718		0.0314372	0.0527283	0.0241691	0.0911777	0.0215633	0.0915845	0.0377121	-0.0108129	0.0106057	0.0332012	0.0150917
20220217_WT_DYN	20220217	WT	WT_R2	TAUs	DYN	F	52.1429	0.0275	9.64849	390	6.5	0.0561117		0.0220269	0.00869826	-0.0120505	0.0392786	-0.01661	0.0474598	-0.0548334		-0.00128134	0.0351435	-0.0122366	0.0382919	0.023519	0.0861224	-0.00318288	0.0305581	0.0130165	0.0254503	0.00183355
20220217_WT_DYN	20220217	WT	WT_R2	TAUs	DYN	F	52.1429	0.0275	9.64849	420	7	-0.0322522		0.036069	0.0218265	-0.0544924	0.109833	0.0361507	-0.00413132	-0.0399431		-0.0124315	0.129813	0.00279277	-0.0490438	0.01893	0.124948	0.127682	-0.0236185	0.00314339	-3.50314e-05	0.0115303
20220217_WT_DYN	20220217	WT	WT_R2	TAUs	DYN	F	52.1429	0.0275	9.64849	450	7.5	0.0140256		-0.0287677	0.0381542	-0.0466959	0.183712	0.0242711	-0.0551299	-0.062919		-0.0255218	-0.0154897	0.123555	-0.0125791	0.0142106	0.102257	0.052114	0.0307347	0.0234933	-0.0398498	0.00471504
20220217_WT_DYN	20220217	WT	WT_R2	TAUs	DYN	F	52.1429	0.0275	9.64849	480	8	0.101245		0.0954674	0.0425671	-0.0232943	-0.00394559	0.0223865	-0.0187201	-0.0631706		-0.0225784	0.0744768	0.025469	-0.0709007	0.0200379	0.113535	0.0149279	-0.050687	0.0517261	-0.00505634	0.0133757
20220217_WT_DYN	20220217	WT	WT_R2	TAUs	DYN	F	52.1429	0.0275	9.64849	510	8.5	0.0299076		-0.0446343	-0.00787502	-0.00655522	-0.114352	-0.00650454	-0.0102215	0.0576669		0.0369733	0.0515377	-0.0344962	-0.0365054	0.0300404	0.031561	-0.0208099	-0.0604591	0.0178563	-0.0369273	-0.0115872
20220217_WT_DYN	20220217	WT	WT_R2	TAUs	DYN	F	52.1429	0.0275	9.64849	540	9	0.0185691		-0.0156971	0.0182956	0.0137302	0.132123	0.0285716	0.0152038	-0.0101884		0.0576254	0.0394386	-0.0120349	0.0822662	0.0231959	0.0954868	0.0804962	0.053691	0.0495108	0.0203362	0.0303664
20220217_WT_DYN	20220217	WT	WT_R2	TAUs	DYN	F	52.1429	0.0275	9.64849	570	9.5	0.0771442		0.00768359	0.0222203	0.0501579	0.0283563	0.022565	0.00931721	-0.123928		0.0211305	0.0109402	-0.012971	0.0671774	0.028956	0.125559	0.0306847	-0.0248798	-0.0108525	-0.0386142	0.00796477
20220217_WT_DYN	20220217	WT	WT_R2	TAUs	DYN	F	52.1429	0.0275	9.64849	600	10	0.00108494		0.100136	0.0108673	0.0203177	-0.0555051	0.0388271	0.0216987	0.0820137		0.0588257	0.00795959	-0.0045943	-0.12913	0.020682	0.169522	0.0167223	-0.0326622	0.00263285	-0.0212418	0.00817776
20220217_WT_DYN	20220217	WT	WT_R2	TAUs	DYN	F	52.1429	0.0275	9.64849	630	10.5	-0.000829664		-0.046965	0.0126289	0.000121781	0.0736966	-0.0127948	0.0488748	-0.0129371		-0.00505634	0.0117134	0.076774	-0.10124	0.0494728	0.0673947	0.00686429	0.00795358	-0.0263643	0.00171488	-0.00539763
20220217_WT_DYN	20220217	WT	WT_R2	TAUs	DYN	F	52.1429	0.0275	9.64849	660	11	-0.0341411		-0.0607879	0.0618872	0.0629559	-0.0955736	0.0259551	-0.0147629	0.0211601		0.00870116	0.00463275	0.0233009	0.107408	0.0359315	0.106867	0.0218061	-0.0698203	-0.00920849	-0.0583795	-0.00202633
20220217_WT_DYN	20220217	WT	WT_R2	TAUs	DYN	F	52.1429	0.0275	9.64849	690	11.5	-0.0319724		0.0476506	0.0039317	0.0171552	-0.00347744	0.000939111	0.0132928	-0.0255088		0.00640328	0.039703	-0.0640495	0.0519955	0.0286726	0.0512011	0.00875847	-0.0291056	0.0175375	0.00737027	0.0157043
20220217_WT_DYN	20220217	WT	WT_R2	TAUs	DYN	F	52.1429	0.0275	9.64849	720	12	0.0224949		-0.0465123	0.0443224	-0.0397961	-0.0170933	0.0550664	0.0139518	0.0327912		0.0156229	0.0243337	0.0258893	-0.112509	-0.00443437	-0.00281443	0.00212697	-0.0161237	0.0514781	0.0431713	0.0242714
20220217_WT_DYN	20220217	WT	WT_R2	TAUs	DYN	F	52.1429	0.0275	9.64849	750	12.5	0.140133		-0.063843	0.0233207	0.0422816	-0.0183369	0.0234138	-0.0134562	0.0366992		-0.0402038	-0.0180882	-0.0242455	0.000962327	0.0262514	0.0825111	0.0158781	0.00347236	-0.0416361	0.0151203	-0.000763021
20220217_WT_DYN	20220217	WT	WT_R2	TAUs	DYN	F	52.1429	0.0275	9.64849	780	13	0.0597468		0.139743	0.0316414	0.0017667	0.163861	0.0375201	-0.00780692	0.0483137		-0.00717947	0.0553179	-0.0106313	-0.0678146	0.026229	0.0952592	0.0514633	0.0596206	0.0500607	0.0194502	0.0296031
20220217_WT_DYN	20220217	WT	WT_R2	TAUs	DYN	F	52.1429	0.0275	9.64849	810	13.5	0.0685206		0.0230269	0.0386015	0.0443343	-0.066112	-0.0449099	0.0169911	0.0259195		-0.0467059	0.0011124	-0.0215887	-0.111788	0.025251	0.0752958	0.0652972	-0.0768553	-0.00185159	0.0388666	0.00436048
20220217_WT_DYN	20220217	WT	WT_R2	TAUs	DYN	F	52.1429	0.0275	9.64849	840	14	0.0270077		-0.00921253	0.0394797	0.0174413	0.110854	0.0171049	0.0879751	0.0901849		0.0142265	-0.00201482	0.110553	0.0216809	0.0407707	0.0664367	0.10743	0.043582	0.00782983	0.0292583	0.0275675
20220217_WT_DYN	20220217	WT	WT_R2	TAUs	DYN	F	52.1429	0.0275	9.64849	870	14.5	0.0532518		0.0195516	0.0269334	0.00921036	-0.0228379	0.037715	0.0356063	0.0782476		0.107102	0.0532705	0.0109492	0.0864691	0.0366568	0.08349	-0.0103219	0.0230824	-0.00473028	0.079996	0.0315659
20220217_WT_DYN	20220217	WT	WT_R2	TAUs	DYN	F	52.1429	0.0275	9.64849	900	15	0.045497		0.0638306	0.0418329	0.0437083	0.0280094	0.0299225	0.0298396	0.0472728		-0.0159798	0.0849099	0.101733	0.114456	0.019697	0.117166	0.0413786	-0.0028561	0.0454284	0.048195	0.0427966
20220217_WT_DYN	20220217	WT	WT_R2	TAUs	DYN	F	52.1429	0.0275	9.64849	930	15.5	-0.0158786		0.0453843	0.0513975	0.0285848	0.0975239	0.0386589	0.00787201	0.0532017		0.0296914	0.0123343	0.00321563	0.113168	0.0393445	0.117158	-0.00181666	-0.00311355	0.00430295	0.0229788	0.0275645
20220217_WT_DYN	20220217	WT	WT_R2	TAUs	DYN	F	52.1429	0.0275	9.64849	960	16	0.0597372		0.0314981	0.020946	0.0386683	0.0261466	0.00331658	0.0193501	-0.021905		0.00222387	0.00173706	-0.00302099	0.00902401	0.0439636	0.0596355	-0.00490398	0.0682445	-0.0132354	0.031899	0.00969489
20220217_WT_DYN	20220217	WT	WT_R2	TAUs	DYN	F	52.1429	0.0275	9.64849	990	16.5	-0.0188039		0.0474769	0.0557156	0.0243429	-0.0431815	0.0076867	0.00455481	0.048754		0.0407576	0.104509	-0.0380982	-0.0430739	0.0268862	0.0456081	-0.0172995	-0.0206928	0.0123322	-0.00934727	0.0099995
20220217_WT_DYN	20220217	WT	WT_R2	TAUs	DYN	F	52.1429	0.0275	9.64849	1020	17	0.0352362		0.00102296	0.0183175	-0.0125665	0.0374071	0.0635599	0.00500814	-0.0164145		0.0585836	0.0505376	0.0552559	-0.0513298	0.0638656	0.0343323	0.0531678	0.00382526	-0.017031	0.00196155	0.0172047
20220217_WT_DYN	20220217	WT	WT_R2	TAUs	DYN	F	52.1429	0.0275	9.64849	1050	17.5	0.0185256		-0.0109676	0.051375	0.0454694	0.0742968	-0.0200487	0.0071888	-0.054983		-0.000409805	0.0398546	-0.0241307	-0.038925	0.0523841	0.0610271	0.0947659	-0.0364836	0.0371808	-0.0610222	0.0283611
20220217_WT_DYN	20220217	WT	WT_R2	TAUs	DYN	F	52.1429	0.0275	9.64849	1080	18	0.04776		0.106847	0.0607214	0.0505504	-0.0412209	0.000642381	0.0204756	-0.00133067		0.0437956	0.0680982	0.0740287	0.175558	0.0225945	0.111539	0.0394965	-0.0180726	0.0454006	0.0534119	0.0276264
20220217_WT_DYN	20220217	WT	WT_R2	TAUs	DYN	F	52.1429	0.0275	9.64849	1110	18.5	0.0505265		-0.0511104	0.0133296	0.00460083	-0.0319731	0.0313897	-0.00471203	-0.0361453		0.0242311	0.00337017	-0.0126494	0.138534	0.0313388	0.0617753	0.0467239	0.0162928	0.0298074	0.0238901	0.0190216
20220217_WT_DYN	20220217	WT	WT_R2	TAUs	DYN	F	52.1429	0.0275	9.64849	1140	19	0.0805192		-0.0220606	0.0726214	0.0265561	0.165944	0.0532146	0.0255211	0.262125		-0.00587429	-0.00598311	0.0250002	-0.065479	0.031494	0.0921657	0.025045	0.0376476	0.0281171	0.0276042	0.0355716
20220217_WT_DYN	20220217	WT	WT_R2	TAUs	DYN	F	52.1429	0.0275	9.64849	1170	19.5	0.0232389		0.0551973	0.0539703	0.0249378	-0.0455486	-0.00172711	0.0196952	-0.0385953		-0.0145057	0.14335	0.0859282	-0.0394621	0.0394432	0.171699	0.0146863	-0.0606264	-0.0211435	-0.00573261	0.00294025
20220217_WT_DYN	20220217	WT	WT_R2	TAUs	DYN	F	52.1429	0.0275	9.64849	1200	20	0.06561		0.0517819	0.00535669	0.00916102	0.173337	0.0090495	-0.0257073	-0.0402261		-0.00439779	-0.0215869	0.0715225	-0.0385937	0.0504061	0.115954	0.028248	0.0737332	-0.0306191	0.00253905	0.00420284
20220217_WT_DYN	20220217	WT	WT_R2	TAUs	DYN	F	52.1429	0.0275	9.64849	1230	20.5	0.00368224		-0.0170332	0.0827435	0.0149513	-0.00692844	0.073723	0.0420099	0.041594		0.0891085	0.0401988	0.111344	0.097612	0.0364692	0.166502	0.0470483	0.0582583	0.0295128	-0.0764227	0.0326825
20220217_WT_DYN	20220217	WT	WT_R2	TAUs	DYN	F	52.1429	0.0275	9.64849	1260	21	-0.0059655		-0.00386579	0.033128	0.0395814	-0.0407828	0.0196434	0.0260709	0.0519224		0.0743516	0.0519383	0.015985	0.0118567	0.0539819	0.117843	-0.0352343	0.036786	0.0541135	0.00703167	0.019511
20220217_WT_DYN	20220217	WT	WT_R2	TAUs	DYN	F	52.1429	0.0275	9.64849	1290	21.5	0.0941196		-0.0520914	0.0651333	0.0489937	0.0800082	0.0963769	0.020518	-0.0185395		-0.0207964	0.109558	0.0318174	0.120029	0.0718973	0.146692	0.0725148	0.0393551	-0.0311748	-0.0623325	0.0291469
20220217_WT_DYN	20220217	WT	WT_R2	TAUs	DYN	F	52.1429	0.0275	9.64849	1320	22	0.0531871		0.000950926	0.0640664	0.0540138	0.0735624	0.0548227	0.029411	0.0311526		0.0281718	0.0141601	-0.00538261	0.107431	0.0320566	0.0683977	0.1197	0.0748501	0.0390491	0.0186334	0.0569157
20220217_WT_DYN	20220217	WT	WT_R2	TAUs	DYN	F	52.1429	0.0275	9.64849	1350	22.5	0.0476802		0.0673567	0.0464908	0.0372698	0.0735587	0.0415891	0.0376827	0.0714626		0.0243228	0.00180059	-0.0242927	0.00227393	0.0515336	0.101016	0.067398	0.029634	0.0503595	0.137811	0.0346768
20220217_WT_DYN	20220217	WT	WT_R2	TAUs	DYN	F	52.1429	0.0275	9.64849	1380	23	0.068552		0.0435007	0.0355181	0.0214214	0.0220399	0.0472138	0.0230781	-0.0298703		0.0389058	0.0906863	0.00568504	-0.0453709	0.0471699	0.0808187	0.129588	-0.00328445	-0.00225196	0.0958736	0.0138007
20220217_WT_DYN	20220217	WT	WT_R2	TAUs	DYN	F	52.1429	0.0275	9.64849	1410	23.5	0.0874638		0.0615582	0.084891	0.0541413	0.0026742	0.0122186	0.044188	0.0494157		0.00260072	0.0610613	-0.0304461	-0.108755	0.0485969	0.113519	0.0346306	-0.0132752	-0.0289474	0.0786708	0.0312326
20220217_WT_DYN	20220217	WT	WT_R2	TAUs	DYN	F	52.1429	0.0275	9.64849	1440	24	-0.00142862		0.0555208	0.0340205	0.0324627	0.124712	0.056378	-0.0158339	0.173344		-0.00665234	0.0271001	0.0974024	-0.00667462	0.0255108	0.121527	0.0818882	0.000620512	0.041368	0.00360316	0.0290096
20220217_WT_DYN	20220217	WT	WT_R2	TAUs	DYN	F	52.1429	0.0275	9.64849	1470	24.5	0.0596213		0.0492904	0.0651686	0.00333741	0.0156567	-0.00489559	0.0545907	-0.0416778		0.0804106	0.0324035	0.00113303	-0.0446053	0.0551321	0.114189	-0.0185816	-0.00877868	0.00336716	0.0222214	0.0255571
20220217_WT_DYN	20220217	WT	WT_R2	TAUs	DYN	F	52.1429	0.0275	9.64849	1500	25	0.0715427		0.0432811	0.086385	0.0372705	-0.0709372	-0.00788849	0.0101075	0.0798308		-0.00859689	0.164809	0.0794105	-0.00198228	0.034684	0.0699984	0.0608831	-0.0105868	0.0224995	-0.00223082	0.0259572
20220217_WT_DYN	20220217	WT	WT_R2	TAUs	DYN	F	52.1429	0.0275	9.64849	1530	25.5	0.0274365		0.145295	0.0168644	0.0284349	0.0817984	-0.0214836	0.000649636	0.0276686		0.00426512	0.0199947	0.0277832	0.0867059	0.0422571	0.123189	0.0206614	0.0291111	-0.00996737	0.140347	0.0320515
20220217_WT_DYN	20220217	WT	WT_R2	TAUs	DYN	F	52.1429	0.0275	9.64849	1560	26	0.023655		0.0662927	0.0309496	-0.0204049	0.0330434	0.0418293	-0.0163331	0.0799114		0.0616354	0.0616676	0.082485	-0.0206334	0.0525497	0.101857	0.0567605	0.00890181	0.0385753	0.002367	0.0250554
20220217_WT_DYN	20220217	WT	WT_R2	TAUs	DYN	F	52.1429	0.0275	9.64849	1590	26.5	0.0298255		-0.0278124	0.0248348	0.0737738	0.0656676	-0.0242714	0.0614998	0.0753371		0.0281088	0.0230581	-0.0187848	-0.0436858	0.0381218	0.133564	0.0372492	0.0731909	0.0732038	0.0369069	0.0201622
20220217_WT_DYN	20220217	WT	WT_R2	TAUs	DYN	F	52.1429	0.0275	9.64849	1620	27	0.0719395		-0.00142851	0.0695173	0.00949361	-0.0629028	0.0601445	0.0695505	-0.137317		0.0156325	0.011059	0.0318823	-0.0269997	0.0472179	0.135778	-0.0377566	0.0162716	-0.00272302	-0.0194767	0.0242943
20220217_WT_DYN	20220217	WT	WT_R2	TAUs	DYN	F	52.1429	0.0275	9.64849	1650	27.5	0.0678617		0.160364	0.063152	0.0810889	-0.00946065	0.0784024	0.0672498	-0.0379048		0.00138726	0.0919964	0.129141	-0.0708797	0.076877	0.144086	0.0546189	0.0368647	-0.00638774	0.0105154	0.0528968
20220217_WT_DYN	20220217	WT	WT_R2	TAUs	DYN	F	52.1429	0.0275	9.64849	1680	28	0.0191021		0.0344881	0.0668704	0.0723834	0.147903	0.0755619	0.0190377	0.0920965		0.0189271	0.0269216	-0.0200541	0.134529	0.0739256	0.125087	0.0256412	0.150948	0.0625044	0.0670485	0.0532357
20220217_WT_DYN	20220217	WT	WT_R2	TAUs	DYN	F	52.1429	0.0275	9.64849	1710	28.5	0.0752339		0.0508557	0.0578283	0.119647	0.12644	0.100032	0.013509	-0.0543554		-0.00117728	0.0299222	0.0392255	-0.0594565	0.0342201	0.187309	0.0264936	0.0936473	0.0131034	0.0345383	0.0393387
20220217_WT_DYN	20220217	WT	WT_R2	TAUs	DYN	F	52.1429	0.0275	9.64849	1740	29	-0.0335064		-0.00740106	0.0572173	0.025575	0.00255688	0.0307526	0.0487961	0.0389025		0.0416094	0.0769993	0.137434	-0.00663399	0.0782823	0.169072	0.0585803	0.0136128	-0.0316932	0.0552642	0.0232518
20220217_WT_DYN	20220217	WT	WT_R2	TAUs	DYN	F	52.1429	0.0275	9.64849	1770	29.5	0.156224		0.090822	0.104464	0.0547877	-0.0119582	0.0469989	0.0423178	-0.064636		0.0609169	0.178892	-0.0440476	0.030072	0.0493163	0.104285	0.0481353	0.00362876	0.034915	0.120782	0.0489824
20220225_PS19_DYN	20220225	PS19	PS19_F2	TAUs	DYN	F	63.8571	0.0233	5.39381	0	0	0.0220359		0.0714048	-0.0108764	0.00748159	-0.0657192	-0.0344415	0.00121094	0.018021		-0.000978069	0.00105858	-0.041924		0.011729	0.089067	-0.0380337	-0.0256435	0.00814026	0.0342967	0
20220225_PS19_DYN	20220225	PS19	PS19_F2	TAUs	DYN	F	63.8571	0.0233	5.39381	30	0.5	0.0773439		0.0451696	0.0268525	0.0285352	-0.0464497	0.00154339	-0.0386132	-0.0595476		0.00523528	0.0646558	-0.00262197		0.020417	0.0208271	-0.0154239	-0.0487634	-0.0462539	-0.0564755	0.0124975
20220225_PS19_DYN	20220225	PS19	PS19_F2	TAUs	DYN	F	63.8571	0.0233	5.39381	60	1	0.083336		0.0534158	0.0286699	0.0488551	0.0776094	0.025528	0.0339727	-0.0859903		0.00907914	0.0589381	0.0726531		0.0165508	0.120614	-0.00833845	-0.00325236	0.0486931	-0.000682275	0.0293295
20220225_PS19_DYN	20220225	PS19	PS19_F2	TAUs	DYN	F	63.8571	0.0233	5.39381	90	1.5	0.0293397		0.140886	-0.0127912	0.0338808	-0.0739407	0.00590249	-0.00389236	-0.00699704		0.0171364	0.0529597	-0.0108961		0.0281379	0.0836285	0.00851373	-0.0289242	-0.00741197	-0.0172695	0.0168703
20220225_PS19_DYN	20220225	PS19	PS19_F2	TAUs	DYN	F	63.8571	0.0233	5.39381	120	2	0.0520652		0.0212917	0.0184973	0.0255586	-0.0315588	0.0183585	0.00273536	0.0420367		0.0418978	0.113617	0.0445585		0.0336468	0.0304122	-0.00410292	-0.0367575	0.0133121	0.0158778	0.0217635
20220225_PS19_DYN	20220225	PS19	PS19_F2	TAUs	DYN	F	63.8571	0.0233	5.39381	150	2.5	0.0839494		-0.0035112	0.0201562	-0.000570343	-0.0699475	-0.0105818	-0.00925554	0.0198016		0.0370639	0.102506	0.0420299		0.0247872	0.113011	-0.00811601	-0.0275146	0.0225236	-0.00759515	0.0263711
20220225_PS19_DYN	20220225	PS19	PS19_F2	TAUs	DYN	F	63.8571	0.0233	5.39381	180	3	0.0366653		0.175335	0.0254193	0.0138051	0.00368511	-0.014213	-0.00456421	-0.00496657		-0.0242679	0.15077	-0.0229362		0.0322442	0.0542532	0.0256457	0.0721321	0.00551906	0.0108735	0.0266566
20220225_PS19_DYN	20220225	PS19	PS19_F2	TAUs	DYN	F	63.8571	0.0233	5.39381	210	3.5	0.113659		0.12342	0.0429904	0.0171571	0.111373	0.00378931	0.0309874	0.00215292		-0.00564803	0.0251725	-0.044943		0.0286885	0.100493	0.0870624	-0.0064797	0.0167798	0.0313872	0.0271025
20220225_PS19_DYN	20220225	PS19	PS19_F2	TAUs	DYN	F	63.8571	0.0233	5.39381	240	4	0.0420661		0.0373454	0.039551	0.0254524	-0.00844305	0.00137082	0.00292777	-0.0526615		0.0277775	0.0465111	-0.0159333		0.0470486	0.100672	0.0207244	-0.0134973	-0.0110656	-0.0122612	0.0222585
20220225_PS19_DYN	20220225	PS19	PS19_F2	TAUs	DYN	F	63.8571	0.0233	5.39381	270	4.5	0.0260927		0.0452877	0.0582367	0.033488	-0.0248627	0.0490585	0.0598302	-0.058321		0.0648352	0.0810971	0.0461059		0.044536	0.150984	0.0414155	0.00847781	0.0338473	0.0264244	0.0447276
20220225_PS19_DYN	20220225	PS19	PS19_F2	TAUs	DYN	F	63.8571	0.0233	5.39381	300	5	0.0303722		0.104726	0.0335436	0.00100811	-0.0713206	0.0381909	0.0426363	-0.0532873		0.0147503	0.0689435	-0.00167476		0.0601971	0.183365	-0.00951764	-0.0171355	0.031649	0.00725009	0.0417858
20220225_PS19_DYN	20220225	PS19	PS19_F2	TAUs	DYN	F	63.8571	0.0233	5.39381	330	5.5	0.0635714		0.096951	0.0682321	0.0368434	-0.0297537	0.0259858	0.0525197	0.106194		0.0243723	0.112277	-0.0108252		0.0681231	0.0828848	0.0100044	0.000350858	0.0724765	0.0789854	0.0544003
20220225_PS19_DYN	20220225	PS19	PS19_F2	TAUs	DYN	F	63.8571	0.0233	5.39381	360	6	0.132127		0.102974	0.0653612	0.0531097	0.112745	0.0997772	0.00605236	-0.0223557		0.0248787	0.23307	0.0753367		0.0649349	0.210867	0.0226917	0.0371673	0.0451817	0.0176851	0.0690113
20220225_PS19_DYN	20220225	PS19	PS19_F2	TAUs	DYN	F	63.8571	0.0233	5.39381	390	6.5	0.160549		0.121713	0.0309996	0.0446966	-0.0119167	0.0239032	0.0776339	0.00512597		0.123417	0.0750188	0.0607945		0.0921106	0.103764	0.0855403	0.043243	0.0783438	0.0231282	0.067463
20220225_PS19_DYN	20220225	PS19	PS19_F2	TAUs	DYN	F	63.8571	0.0233	5.39381	420	7	0.139501		0.144785	0.0645445	0.0681725	0.0431545	0.0634004	0.0662861	0.0319421		0.073761	0.218798	0.083708		0.0967864	0.169374	0.059636	0.0652839	0.0749486	0.117149	0.0788192
20220225_PS19_DYN	20220225	PS19	PS19_F2	TAUs	DYN	F	63.8571	0.0233	5.39381	450	7.5	0.140704		0.0774231	0.0519637	0.0253913	0.086943	0.0456376	0.0729836	0.0735493		0.0229338	0.191498	0.0267545		0.107008	0.21198	0.0565354	0.0467815	0.0577256	0.053857	0.0799524
20220225_PS19_DYN	20220225	PS19	PS19_F2	TAUs	DYN	F	63.8571	0.0233	5.39381	480	8	0.1077		0.274851	0.10981	0.110937	0.198578	0.114079	0.0340994	0.094945		0.0878898	0.228536	0.29946		0.111591	0.168695	0.163755	0.0708224	0.126828	0.100829	0.116102
20220225_PS19_DYN	20220225	PS19	PS19_F2	TAUs	DYN	F	63.8571	0.0233	5.39381	510	8.5	0.133174		0.158709	0.093251	0.0899552	0.0600631	0.0787216	0.0663727	0.0475974		0.0964585	0.210598	0.145686		0.0997961	0.119161	0.138401	0.0726449	0.186052	0.135321	0.101737
20220225_PS19_DYN	20220225	PS19	PS19_F2	TAUs	DYN	F	63.8571	0.0233	5.39381	540	9	0.116959		0.288255	0.118682	0.114851	-0.0325891	0.0877738	0.0681461	0.177724		0.0936464	0.180416	0.0932526		0.117087	0.183177	0.0742286	0.114761	0.0994864	0.155822	0.116034
20220225_PS19_DYN	20220225	PS19	PS19_F2	TAUs	DYN	F	63.8571	0.0233	5.39381	570	9.5	0.0787748		0.212678	0.0891319	0.0950923	0.125226	0.0861199	0.102008	0.24053		0.10479	0.248679	0.180381		0.145251	0.175088	0.130855	0.0462292	0.0332071	0.134918	0.11596
20220225_PS19_DYN	20220225	PS19	PS19_F2	TAUs	DYN	F	63.8571	0.0233	5.39381	600	10	0.129451		0.209493	0.120285	0.0550395	0.0474518	0.120627	0.0817185	0.204684		0.109183	0.108895	0.079238		0.143239	0.200207	0.13255	0.105497	0.0903052	0.122284	0.115194
20220225_PS19_DYN	20220225	PS19	PS19_F2	TAUs	DYN	F	63.8571	0.0233	5.39381	630	10.5	0.178424		0.199223	0.121204	0.0895633	-0.010047	0.075743	0.0197846	0.0490524		0.0992986	0.229106	0.159131		0.144071	0.367808	0.10781	0.0642705	0.0569961	0.0761422	0.123793
20220225_PS19_DYN	20220225	PS19	PS19_F2	TAUs	DYN	F	63.8571	0.0233	5.39381	660	11	0.171536		0.18389	0.0920906	0.0484689	-0.00226124	0.166802	0.103977	-0.0162774		0.166897	0.189095	0.0925175		0.13919	0.223182	0.0676883	0.0714256	0.0778684	0.0546702	0.120512
20220225_PS19_DYN	20220225	PS19	PS19_F2	TAUs	DYN	F	63.8571	0.0233	5.39381	690	11.5	0.0834339		0.354281	0.123976	0.0826843	0.0755552	0.0918827	0.0421281	0.044785		0.0460199	0.304779	0.143062		0.154156	0.235592	0.0953609	0.118948	0.0415154	0.0519854	0.12557
20220225_PS19_DYN	20220225	PS19	PS19_F2	TAUs	DYN	F	63.8571	0.0233	5.39381	720	12	0.178402		0.18075	0.138466	0.0953477	0.0573492	0.114541	0.098837	0.228686		0.114005	0.167365	0.128826		0.134887	0.284812	0.103273	0.0965139	0.115982	0.11391	0.12735
20220225_PS19_DYN	20220225	PS19	PS19_F2	TAUs	DYN	F	63.8571	0.0233	5.39381	750	12.5	0.247109		0.235113	0.149632	0.116773	0.163357	0.152989	0.108436	0.0390466		0.178055	0.149925	0.172639		0.180243	0.25628	0.173285	0.0974103	0.0691912	0.0983393	0.153083
20220225_PS19_DYN	20220225	PS19	PS19_F2	TAUs	DYN	F	63.8571	0.0233	5.39381	780	13	0.1642		0.208979	0.158328	0.0870891	0.0645997	0.0931991	0.122189	0.0368831		0.094507	0.237692	0.0489201		0.149341	0.270658	0.139927	0.109176	0.0690449	0.106757	0.134114
20220225_PS19_DYN	20220225	PS19	PS19_F2	TAUs	DYN	F	63.8571	0.0233	5.39381	810	13.5	0.177709		0.256662	0.180344	0.222041	0.0297096	0.171822	0.135485	-0.00702352		0.0954238	0.288488	0.0752703		0.178806	0.252511	0.296249	0.0719753	0.126313	0.0766354	0.163761
20220225_PS19_DYN	20220225	PS19	PS19_F2	TAUs	DYN	F	63.8571	0.0233	5.39381	840	14	0.134971		0.239977	0.208578	0.163859	0.17094	0.15428	0.12831	0.150836		0.112825	0.334904	0.204951		0.192483	0.321614	0.136043	0.179928	0.0953961	0.109956	0.164692
20220225_PS19_DYN	20220225	PS19	PS19_F2	TAUs	DYN	F	63.8571	0.0233	5.39381	870	14.5	0.210741		0.245758	0.112644	0.0956419	0.170999	0.123051	0.154753	0.0624883		0.137223	0.200085	0.0656318		0.177934	0.243045	0.111865	0.0999904	0.140668	0.158161	0.144039
20220225_PS19_DYN	20220225	PS19	PS19_F2	TAUs	DYN	F	63.8571	0.0233	5.39381	900	15	0.246162		0.228501	0.168538	0.156487	0.156301	0.195273	0.120055	0.227342		0.166249	0.281995	0.209358		0.16523	0.34828	0.113003	0.147375	0.126779	0.233752	0.168893
20220225_PS19_DYN	20220225	PS19	PS19_F2	TAUs	DYN	F	63.8571	0.0233	5.39381	930	15.5	0.314801		0.253968	0.130702	0.0632787	0.160506	0.178522	0.103128	0.0137952		0.125387	0.321782	0.175351		0.212911	0.230207	0.15232	0.145562	0.0876611	0.115181	0.163821
20220225_PS19_DYN	20220225	PS19	PS19_F2	TAUs	DYN	F	63.8571	0.0233	5.39381	960	16	0.21077		0.165451	0.148671	0.21112	0.0584646	0.147286	0.158116	-0.00650528		0.17546	0.233594	0.113319		0.181542	0.367494	0.0504856	0.22602	0.144887	0.139956	0.164288
20220225_PS19_DYN	20220225	PS19	PS19_F2	TAUs	DYN	F	63.8571	0.0233	5.39381	990	16.5	0.219997		0.131491	0.188613	0.15124	0.0755181	0.213182	0.103501	0.140215		0.171962	0.324709	0.130462		0.208552	0.231406	0.124605	0.122729	0.10169	0.12415	0.174749
20220225_PS19_DYN	20220225	PS19	PS19_F2	TAUs	DYN	F	63.8571	0.0233	5.39381	1020	17	0.202487		0.279266	0.138599	0.111833	0.0464876	0.131722	0.110255	0.180777		0.168031	0.212979	0.0946411		0.174314	0.340359	0.0703461	0.139472	0.142736	0.111679	0.157435
20220225_PS19_DYN	20220225	PS19	PS19_F2	TAUs	DYN	F	63.8571	0.0233	5.39381	1050	17.5	0.26856		0.276941	0.164762	0.150509	0.0410311	0.166127	0.130198	0.0755624		0.0943425	0.179385	0.173389		0.167244	0.284293	0.0569281	0.0910067	0.0664785	0.0729271	0.154473
20220225_PS19_DYN	20220225	PS19	PS19_F2	TAUs	DYN	F	63.8571	0.0233	5.39381	1080	18	0.264369		0.305644	0.151852	0.103442	0.0258958	0.137901	0.0994194	0.198687		0.0958555	0.336612	0.0187924		0.160602	0.389996	0.0435575	0.133192	0.0615063	0.147766	0.149988
20220225_PS19_DYN	20220225	PS19	PS19_F2	TAUs	DYN	F	63.8571	0.0233	5.39381	1110	18.5	0.13265		0.239385	0.20255	0.0910552	0.0530898	0.11077	0.049035	0.0816886		0.164126	0.281282	0.0814506		0.17896	0.268386	0.0879296	0.071632	0.101016	0.122145	0.145942
20220225_PS19_DYN	20220225	PS19	PS19_F2	TAUs	DYN	F	63.8571	0.0233	5.39381	1140	19	0.274503		0.21369	0.182985	0.194313	0.088618	0.158528	0.0864873	0.175398		0.160277	0.3937	0.0995536		0.21774	0.291222	0.0929425	0.132353	0.104138	0.172822	0.184572
20220225_PS19_DYN	20220225	PS19	PS19_F2	TAUs	DYN	F	63.8571	0.0233	5.39381	1170	19.5	0.16442		0.163886	0.154063	0.140431	0.152994	0.151283	0.0868752	0.229898		0.0927422	0.244537	0.210471		0.171663	0.234269	0.16371	0.23356	0.168429	0.206815	0.15112
20220225_PS19_DYN	20220225	PS19	PS19_F2	TAUs	DYN	F	63.8571	0.0233	5.39381	1200	20	0.194205		0.182465	0.23009	0.139713	0.179004	0.0704585	0.106459	0.0441628		0.0952493	0.300768	0.0720063		0.162217	0.330435	0.176549	0.264148	0.0759458	0.149031	0.153314
20220225_PS19_DYN	20220225	PS19	PS19_F2	TAUs	DYN	F	63.8571	0.0233	5.39381	1230	20.5	0.293916		0.285021	0.17781	0.106076	0.0811473	0.188882	0.0955963	0.0567359		0.102013	0.393272	0.148158		0.163253	0.293625	0.107757	0.169438	0.065227	0.104219	0.162409
20220225_PS19_DYN	20220225	PS19	PS19_F2	TAUs	DYN	F	63.8571	0.0233	5.39381	1260	21	0.179465		0.210838	0.145831	0.132151	0.0513411	0.110465	0.0506614	0.0939953		0.0810962	0.378937	0.0804971		0.124694	0.198745	0.0947506	0.132936	0.0648268	0.114001	0.119149
20220225_PS19_DYN	20220225	PS19	PS19_F2	TAUs	DYN	F	63.8571	0.0233	5.39381	1290	21.5	0.117222		0.28425	0.194996	0.103179	0.0338963	0.151784	0.102249	0.105525		0.121406	0.228528	0.118761		0.170566	0.199988	0.032124	0.169844	0.0791512	0.157924	0.145342
20220225_PS19_DYN	20220225	PS19	PS19_F2	TAUs	DYN	F	63.8571	0.0233	5.39381	1320	22	0.252072		0.223122	0.116317	0.075714	0.01008	0.15163	0.0664176	0.0413621		0.111014	0.179077	0.116282		0.139832	0.246233	0.0787306	0.160045	0.118395	0.0763656	0.130835
20220225_PS19_DYN	20220225	PS19	PS19_F2	TAUs	DYN	F	63.8571	0.0233	5.39381	1350	22.5	0.199855		0.222856	0.166736	0.11484	0.0630301	0.0997361	0.114854	0.130127		0.0905164	0.122633	0.145129		0.173898	0.277688	0.0875084	0.0447546	0.192349	0.130065	0.136424
20220225_PS19_DYN	20220225	PS19	PS19_F2	TAUs	DYN	F	63.8571	0.0233	5.39381	1380	23	0.150377		0.271898	0.155532	0.0954353	0.00234639	0.120755	0.147082	0.019483		0.13828	0.239947	0.127259		0.17245	0.199176	0.0633476	0.114909	0.0634809	0.108792	0.129763
20220225_PS19_DYN	20220225	PS19	PS19_F2	TAUs	DYN	F	63.8571	0.0233	5.39381	1410	23.5	0.217498		0.250073	0.145353	0.0972414	0.0708386	0.0670137	0.0496086	0.0675288		0.0760098	0.178116	0.0508108		0.125798	0.292969	0.112951	0.0426438	0.112197	0.0599386	0.120362
20220225_PS19_DYN	20220225	PS19	PS19_F2	TAUs	DYN	F	63.8571	0.0233	5.39381	1440	24	0.151136		0.173399	0.147528	0.0582898	0.000665494	0.142852	0.104518	0.18869		0.0855019	0.186919	0.0766306		0.124557	0.256327	0.0940115	0.0738955	0.0893784	0.0881354	0.117755
20220225_PS19_DYN	20220225	PS19	PS19_F2	TAUs	DYN	F	63.8571	0.0233	5.39381	1470	24.5	0.180399		0.140439	0.0922667	0.0775319	0.113983	0.0692158	0.148917	0.0194045		0.132561	0.205474	0.066549		0.139612	0.335823	0.155726	0.147552	0.0812795	0.0716476	0.119702
20220225_PS19_DYN	20220225	PS19	PS19_F2	TAUs	DYN	F	63.8571	0.0233	5.39381	1500	25	0.236548		0.168822	0.168846	0.0866343	0.026323	0.0922227	0.0363109	0.150651		0.0875168	0.157711	0.115637		0.110877	0.231827	0.0361951	0.0433398	0.0550154	0.112094	0.104866
20220225_PS19_DYN	20220225	PS19	PS19_F2	TAUs	DYN	F	63.8571	0.0233	5.39381	1530	25.5	0.136937		0.244639	0.123436	0.0884106	0.10055	0.166777	0.0907971	0.0494009		0.141392	0.244432	0.201554		0.145045	0.345232	0.0945664	0.0620649	0.101176	0.0892586	0.13917
20220225_PS19_DYN	20220225	PS19	PS19_F2	TAUs	DYN	F	63.8571	0.0233	5.39381	1560	26	0.165343		0.17584	0.081591	0.130921	0.158304	0.0542464	0.175627	0.0304877		0.113046	0.0777579	0.112741		0.13092	0.274317	0.129809	0.142899	0.0592887	0.0972007	0.105946
20220225_PS19_DYN	20220225	PS19	PS19_F2	TAUs	DYN	F	63.8571	0.0233	5.39381	1590	26.5	0.192093		0.215136	0.133956	0.0688997	0.153939	0.0770456	0.107834	-0.0588696		0.0856773	0.204475	0.103851		0.145564	0.370176	0.143676	0.163409	0.0709427	0.0904048	0.125498
20220225_PS19_DYN	20220225	PS19	PS19_F2	TAUs	DYN	F	63.8571	0.0233	5.39381	1620	27	0.150089		0.165355	0.0890267	0.108359	0.109547	0.101421	0.161557	0.144046		0.139024	0.106935	0.108026		0.108205	0.306286	0.127416	0.101185	0.0467621	0.12332	0.11477
20220225_PS19_DYN	20220225	PS19	PS19_F2	TAUs	DYN	F	63.8571	0.0233	5.39381	1650	27.5	0.171615		0.0752012	0.136543	0.0275815	-0.0330007	0.0953624	0.0729158	0.247462		0.065307	0.157636	0.0455258		0.128655	0.283208	0.0683491	0.0247484	0.0798796	0.0566589	0.102429
20220225_PS19_DYN	20220225	PS19	PS19_F2	TAUs	DYN	F	63.8571	0.0233	5.39381	1680	28	0.149613		0.237717	0.0913433	0.136997	0.195376	0.126768	0.0595222	0.0284291		0.0624824	0.200794	0.121437		0.119682	0.216052	0.0754442	0.0826371	0.101278	0.0988233	0.114356
20220225_PS19_DYN	20220225	PS19	PS19_F2	TAUs	DYN	F	63.8571	0.0233	5.39381	1710	28.5	0.228625		0.243265	0.0907289	0.0832078	-0.00930193	0.138546	0.0524151	0.270057		0.0963493	0.187251	0.163648		0.15551	0.338948	0.0266944	0.0819104	0.0925189	0.0343685	0.126567
20220225_PS19_DYN	20220225	PS19	PS19_F2	TAUs	DYN	F	63.8571	0.0233	5.39381	1740	29	0.160324		0.13966	0.129316	0.138119	0.0793299	0.0779061	0.14742	0.0725491		0.152426	0.144825	0.0468643		0.12251	0.19543	0.106307	0.043563	0.0562998	0.120149	0.109088
20220225_PS19_DYN	20220225	PS19	PS19_F2	TAUs	DYN	F	63.8571	0.0233	5.39381	1770	29.5	0.263815		0.202506	0.118995	0.0481668	0.045053	0.100169	0.0741904	0.194153		0.0538591	0.110321	-0.00399678		0.102726	0.219832	0.0346209	0.0457785	0.0143997	0.152205	0.0908785
20220225_WT_DYN	20220225	WT	WT_R2	TAUs	DYN	F	53.2857	0.0263	5.80664	0	0	0.04049	0.0106971	-0.0107906	-0.00206521	0.0012208	-0.0326047	-0.0151859	-0.0286187	-0.0534546	0.0285421	-0.00277498	-0.013832	0.000882966	0.0318238	-0.00233677	-0.0064308	-0.00357163	-0.00487726	-0.0104651	0.0213216	0
20220225_WT_DYN	20220225	WT	WT_R2	TAUs	DYN	F	53.2857	0.0263	5.80664	30	0.5	0.0139261	-0.00798046	-0.0439601	0.00305551	0.0310884	-0.0339671	-0.00202696	-0.0431781	0.0105856	0.000108859	-0.0012251	-0.00696692	-0.0183484	-0.00350004	-0.00989	-0.024419	-0.0165026	0.0323317	-0.0105073	-0.0153492	-0.00429612
20220225_WT_DYN	20220225	WT	WT_R2	TAUs	DYN	F	53.2857	0.0263	5.80664	60	1	-0.0128205	-0.0542097	-0.00453875	-0.0108246	-0.0241099	-0.0483009	-0.0277355	0.0771536	0.00392658	-0.00435418	-0.00765905	-0.0238687	-0.0375445	-0.0461284	0.000796768	0.0500852	-0.0371698	0.0164437	-0.00962015	-0.01911	-0.00544049
20220225_WT_DYN	20220225	WT	WT_R2	TAUs	DYN	F	53.2857	0.0263	5.80664	90	1.5	0.0170525	-0.0533997	0.0367888	-0.00400563	-0.0223554	0.0243915	0.0137605	-0.00699787	0.00385217	0.0500295	-0.0209591	0.0424147	-0.0470379	-0.0107154	0.00040057	0.0415063	0.0535144	-0.0126123	0.0130876	-0.0537386	0.00641798
20220225_WT_DYN	20220225	WT	WT_R2	TAUs	DYN	F	53.2857	0.0263	5.80664	120	2	-0.0143314	-0.0661142	0.0194374	0.00120422	-0.013493	0.0531907	0.0403013	0.0320764	0.146859	-0.0186552	-0.00249403	-0.000763156	0.0211738	0.05753	0.00372019	0.0247153	0.00172665	0.0367806	0.0251548	-0.0101124	0.00889418
20220225_WT_DYN	20220225	WT	WT_R2	TAUs	DYN	F	53.2857	0.0263	5.80664	150	2.5	0.0175686	-0.0359062	0.0366937	0.00107441	-0.0390757	-0.0549318	0.0215004	-0.0297624	-0.0372835	-0.0484505	-0.0221643	0.0289024	0.131127	-0.0663372	0.00546255	0.0780596	-0.0233192	-0.00660194	-0.0090535	-0.0425548	-2.43346e-06
20220225_WT_DYN	20220225	WT	WT_R2	TAUs	DYN	F	53.2857	0.0263	5.80664	180	3	-0.007207	-0.00670973	0.0152832	0.0137767	0.00657061	-0.0238178	0.0377005	0.0210943	0.00215346	-0.0257003	0.00817171	0.0572581	-0.00358072	-0.0524906	0.006647	0.0431592	0.00151852	0.0276695	0.0207945	-0.0102807	0.018568
20220225_WT_DYN	20220225	WT	WT_R2	TAUs	DYN	F	53.2857	0.0263	5.80664	210	3.5	0.0441868	0.136671	0.0217148	0.00172498	0.00216319	0.0420876	0.0780967	-0.0255485	0.0124887	0.00509996	0.00682057	-0.00476734	0.0780874	-0.0312904	0.0106222	0.0472443	0.06326	0.00338179	0.00317	0.0371783	0.0181708
20220225_WT_DYN	20220225	WT	WT_R2	TAUs	DYN	F	53.2857	0.0263	5.80664	240	4	0.00989209	-0.0174951	0.0204389	0.0129891	0.0538577	0.0129759	0.0306838	0.0184517	0.00500817	0.0154901	0.0579297	-0.0300693	0.0691481	0.0427649	0.034173	0.0496179	0.0469446	-0.0152644	0.0313767	0.079127	0.0286785
20220225_WT_DYN	20220225	WT	WT_R2	TAUs	DYN	F	53.2857	0.0263	5.80664	270	4.5	0.0585252	-0.018843	0.00273224	0.0157692	-0.00604061	0.350903	0.048919	0.0650935	0.0436575	-0.000303422	0.0454024	-0.00152707	0.0465996	0.0886842	0.0223159	0.045239	0.0239848	0.0419311	0.0254556	-0.0202222	0.0303452
20220225_WT_DYN	20220225	WT	WT_R2	TAUs	DYN	F	53.2857	0.0263	5.80664	300	5	0.10319	-0.0499475	0.0549913	-0.00934331	0.0106668	0.0266343	0.0230212	0.0262879	0.0401746	0.0223394	0.0271485	0.0409693	0.044568	-0.040306	0.012771	0.145791	0.0614759	-0.00364293	0.0254395	-0.00400985	0.027363
20220225_WT_DYN	20220225	WT	WT_R2	TAUs	DYN	F	53.2857	0.0263	5.80664	330	5.5	0.0635548	0.051959	0.0200976	0.0210748	0.0247278	0.0263008	0.0389405	0.0199702	0.0547652	-0.00312091	0.05075	0.0102167	0.0158343	0.0608185	0.0370164	0.132103	0.0581273	0.0692236	0.016291	-0.00374342	0.0421846
20220225_WT_DYN	20220225	WT	WT_R2	TAUs	DYN	F	53.2857	0.0263	5.80664	360	6	-0.0013111	-0.0323782	0.033777	0.0389618	0.0502543	-0.00694635	0.0246041	0.0185736	-0.000278973	0.0642503	0.0369044	-0.00653798	0.0836041	0.138314	0.0388167	0.104404	0.0124717	0.0544955	0.0230787	0.0661924	0.040083
20220225_WT_DYN	20220225	WT	WT_R2	TAUs	DYN	F	53.2857	0.0263	5.80664	390	6.5	0.0133921	-0.028493	0.0145682	0.00930593	-0.0258486	-0.0211696	0.0556283	-0.00239061	-0.0228257	0.0039143	0.0343065	0.0571582	0.0601429	-0.0153503	0.0280759	0.0688816	0.0504641	0.0220556	0.0171913	-0.0232908	0.022007
20220225_WT_DYN	20220225	WT	WT_R2	TAUs	DYN	F	53.2857	0.0263	5.80664	420	7	0.0359276	0.231329	0.101299	0.0129344	0.0834357	-0.0347554	0.0412821	0.0180324	0.0515123	0.00300099	0.0656607	0.0112613	0.0800156	0.0155367	0.0481189	0.0889184	0.0132394	0.0279604	0.00169095	0.0224254	0.0400446
20220225_WT_DYN	20220225	WT	WT_R2	TAUs	DYN	F	53.2857	0.0263	5.80664	450	7.5	0.116555	-0.0155534	0.00655502	0.0369138	0.0234219	0.0240496	0.0837465	0.072171	-0.0357642	0.0120383	0.0661092	0.0536451	0.0469086	-0.000242129	0.0549	0.146079	0.0823819	0.0508225	0.0390208	0.0150395	0.0520385
20220225_WT_DYN	20220225	WT	WT_R2	TAUs	DYN	F	53.2857	0.0263	5.80664	480	8	0.082967	-0.00863456	0.0371772	0.0818392	-0.00930471	-0.00800886	0.055101	0.00648152	-0.00489125	0.0405368	0.067314	0.100844	-0.0168616	0.102907	0.0548824	0.147525	0.127707	0.0253262	0.0286271	-0.00582559	0.0610064
20220225_WT_DYN	20220225	WT	WT_R2	TAUs	DYN	F	53.2857	0.0263	5.80664	510	8.5	0.0715508	-0.00752338	0.0273227	0.0500853	0.0202844	0.158096	0.0536251	0.0612232	0.000994525	0.0735413	0.0600871	0.0536583	0.0795035	0.0729894	0.0531367	0.139833	0.0759386	0.1254	0.012293	0.0385905	0.0561335
20220225_WT_DYN	20220225	WT	WT_R2	TAUs	DYN	F	53.2857	0.0263	5.80664	540	9	0.0335378	0.0350817	0.0279513	0.0384159	0.0962876	0.0616618	0.0589029	0.0879969	0.0188081	0.0591464	0.123287	0.0634082	-0.0152013	0.0157524	0.0607152	0.149751	0.0301187	0.0920186	0.0346684	0.0949127	0.064214
20220225_WT_DYN	20220225	WT	WT_R2	TAUs	DYN	F	53.2857	0.0263	5.80664	570	9.5	0.0943801	0.0389864	0.101986	0.0367046	0.0514765	0.00438703	0.0298347	0.0207977	0.0335322	0.0427337	0.0325489	0.0623852	-0.00347726	0.126405	0.0631534	0.0495265	-0.0240327	0.0228358	0.0107971	0.094416	0.0469708
20220225_WT_DYN	20220225	WT	WT_R2	TAUs	DYN	F	53.2857	0.0263	5.80664	600	10	0.0215594	-0.0247625	0.0112536	0.0582183	0.0337078	0.0490928	0.0655914	0.0384405	0.0340378	0.00797772	0.0562558	0.0273484	-0.022478	-0.0157922	0.0630046	0.105993	0.00753601	0.040447	0.0238322	-0.0202809	0.0470068
20220225_WT_DYN	20220225	WT	WT_R2	TAUs	DYN	F	53.2857	0.0263	5.80664	630	10.5	0.0777137	-0.0054208	0.0692498	0.0412357	0.0400295	-0.0398744	0.0770514	0.0624907	0.003417	0.0555159	0.0925946	0.05865	0.218468	-0.00516144	0.0623417	0.106327	0.0887392	0.0451584	0.121897	0.0605595	0.0660237
20220225_WT_DYN	20220225	WT	WT_R2	TAUs	DYN	F	53.2857	0.0263	5.80664	660	11	0.0594597	0.0462762	0.0664867	0.0753186	0.0301857	0.0611638	0.0830554	0.0308024	0.0137705	-0.00578354	0.0584805	0.017932	0.0627756	0.0838998	0.0589462	0.0692966	0.102481	0.101401	0.0498121	0.107563	0.0663723
20220225_WT_DYN	20220225	WT	WT_R2	TAUs	DYN	F	53.2857	0.0263	5.80664	690	11.5	0.0743549	-0.0511843	0.0699178	0.0766397	0.0182268	0.177783	0.0825273	0.0225922	0.0698432	0.0780392	0.0940148	0.0955925	0.0254657	-0.0139506	0.0734646	0.168808	0.141103	0.165859	0.0718813	0.163895	0.0843305
20220225_WT_DYN	20220225	WT	WT_R2	TAUs	DYN	F	53.2857	0.0263	5.80664	720	12	0.0355398	0.116044	0.0387215	0.0773491	0.0371781	0.011206	0.124197	0.0117921	0.0451301	-0.0095751	0.0840094	0.0710805	0.0559911	0.026864	0.0637378	0.159953	0.0618064	0.065743	0.0117495	0.0643035	0.0685158
20220225_WT_DYN	20220225	WT	WT_R2	TAUs	DYN	F	53.2857	0.0263	5.80664	750	12.5	0.116764	-0.00391696	0.077171	0.0592017	0.0663623	0.0628062	0.112652	0.0734427	-0.0260208	0.0229646	0.16426	0.0488476	0.055803	-0.0142763	0.0763018	0.0450694	0.07314	0.15782	0.0565813	0.0779453	0.0799103
20220225_WT_DYN	20220225	WT	WT_R2	TAUs	DYN	F	53.2857	0.0263	5.80664	780	13	0.115033	0.0290346	0.0619546	0.0385233	0.0365543	0.0938649	0.0628777	0.0322193	-0.0199388	0.0129073	0.0623672	0.034439	0.0939222	0.0870304	0.0648422	0.0674539	0.150084	0.112144	0.0947232	0.0189856	0.0625108
20220225_WT_DYN	20220225	WT	WT_R2	TAUs	DYN	F	53.2857	0.0263	5.80664	810	13.5	0.142013	0.0552125	0.0863028	0.064538	0.0749752	0.0395433	0.100005	0.0551953	0.0271054	0.186495	0.0267051	0.0861	0.205801	0.0759483	0.073271	0.0799015	-0.00615251	0.0659888	0.0259379	0.10071	0.0652285
20220225_WT_DYN	20220225	WT	WT_R2	TAUs	DYN	F	53.2857	0.0263	5.80664	840	14	0.0774997	-0.0106648	0.0848425	0.0483706	0.0798913	0.0339137	0.115829	0.0715929	0.0164099	0.0744816	0.145434	0.121461	0.0786747	0.0462171	0.0738175	0.0601	0.0783006	0.0854226	0.0569635	0.0217393	0.0750314
20220225_WT_DYN	20220225	WT	WT_R2	TAUs	DYN	F	53.2857	0.0263	5.80664	870	14.5	0.14699	0.0108003	0.0842012	0.052315	0.0398203	0.00108319	0.0900044	0.137421	0.0266755	0.0452586	0.0806539	0.200379	0.29899	0.00124582	0.0779343	0.09397	0.00641783	0.120111	0.109588	0.0259064	0.0808067
20220225_WT_DYN	20220225	WT	WT_R2	TAUs	DYN	F	53.2857	0.0263	5.80664	900	15	0.070133	0.17092	0.0740554	0.0670543	0.0506418	0.0576598	0.0570954	0.0920829	0.0569276	0.0419476	0.0665444	0.0814595	0.122783	-0.00400787	0.0866452	0.131378	0.0725729	0.180861	0.0666929	0.0715665	0.0713269
20220225_WT_DYN	20220225	WT	WT_R2	TAUs	DYN	F	53.2857	0.0263	5.80664	930	15.5	0.0818417	0.194033	0.139741	0.0374197	0.0722249	0.0521108	0.0762014	0.10223	0.00805616	0.0703594	0.082544	0.119824	0.0203817	-0.0188133	0.0765592	0.163802	0.0258248	0.107359	0.0281827	0.0401609	0.0659949
20220225_WT_DYN	20220225	WT	WT_R2	TAUs	DYN	F	53.2857	0.0263	5.80664	960	16	0.0696303	0.12432	0.0570118	0.0700467	0.0105466	0.0536187	0.147955	0.0554219	0.171808	0.0260216	0.125947	0.0834789	0.0389252	0.095804	0.0817602	0.170269	0.0631646	0.0436956	0.0864041	0.0779357	0.0813771
20220225_WT_DYN	20220225	WT	WT_R2	TAUs	DYN	F	53.2857	0.0263	5.80664	990	16.5	0.157105	0.0267794	0.0358467	0.103855	0.0753757	0.0811973	0.112616	0.0699892	0.166868	0.0565652	0.131867	0.0578897	0.100542	0.208135	0.098361	0.126153	0.0659943	0.144726	0.0429442	0.0444602	0.090031
20220225_WT_DYN	20220225	WT	WT_R2	TAUs	DYN	F	53.2857	0.0263	5.80664	1020	17	0.0738535	0.0846208	0.113898	0.0380122	0.0717383	0.0899135	0.0684986	0.105438	0.113836	0.0048038	0.124258	0.0331788	0.0615102	0.0192637	0.0914802	0.166196	-0.0249187	0.166876	0.0618611	0.130019	0.0772108
20220225_WT_DYN	20220225	WT	WT_R2	TAUs	DYN	F	53.2857	0.0263	5.80664	1050	17.5	0.0926053	0.00397388	0.0578812	0.0439984	0.042769	0.0842139	0.0485613	0.052884	0.113721	0.0772607	0.0802427	0.0469687	0.0375502	0.164175	0.0839841	0.172262	0.0307264	0.117313	0.037423	0.00972152	0.070845
20220225_WT_DYN	20220225	WT	WT_R2	TAUs	DYN	F	53.2857	0.0263	5.80664	1080	18	0.0426881	0.143168	0.150604	0.094966	0.0252719	0.0733614	0.112809	0.0333614	0.152105	0.0508355	0.0330895	0.046854	0.232572	0.073153	0.0821976	0.0985462	0.0895624	0.102633	0.0825824	0.0828741	0.0776753
20220225_WT_DYN	20220225	WT	WT_R2	TAUs	DYN	F	53.2857	0.0263	5.80664	1110	18.5	0.0930023	0.0630445	0.105484	0.071686	0.133323	0.0300515	0.110875	0.11254	0.0690569	0.131355	0.138503	0.0210215	0.164296	0.0917971	0.101481	0.187557	0.0701837	0.0080692	0.0565902	0.0329835	0.0962021
20220225_WT_DYN	20220225	WT	WT_R2	TAUs	DYN	F	53.2857	0.0263	5.80664	1140	19	0.211692	0.289211	0.0712984	0.0974526	0.0682478	0.0261539	0.0893671	0.0786419	0.0609514	0.0303847	0.0569926	0.0213674	0.0775964	-0.0481681	0.0888058	0.207227	0.0439925	0.0899342	0.0712387	0.0921583	0.0843004
20220225_WT_DYN	20220225	WT	WT_R2	TAUs	DYN	F	53.2857	0.0263	5.80664	1170	19.5	0.0609266	0.111683	0.0821975	0.121392	0.139454	0.206792	0.0769444	0.146922	0.128138	0.0296291	0.0913549	-0.000694753	0.0162213	0.014867	0.0791851	0.196011	0.029105	0.14023	0.0647068	0.0800996	0.0892647
20220225_WT_DYN	20220225	WT	WT_R2	TAUs	DYN	F	53.2857	0.0263	5.80664	1200	20	0.0697014	0.00984947	0.0533068	0.0870065	0.0797533	0.0991982	0.130345	0.112366	0.0485082	0.10983	0.0545639	0.0308161	0.0811988	0.0397412	0.0860673	0.201246	0.0517765	0.0759051	0.0667883	0.0777625	0.0841422
20220225_WT_DYN	20220225	WT	WT_R2	TAUs	DYN	F	53.2857	0.0263	5.80664	1230	20.5	0.124434	0.0485157	0.125703	0.0380351	0.0981312	0.203404	0.0726016	0.0755071	0.127063	0.158852	0.0660433	0.157184	0.267838	0.221747	0.0767287	0.0984181	0.10131	0.20636	0.0717255	0.00248011	0.080405
20220225_WT_DYN	20220225	WT	WT_R2	TAUs	DYN	F	53.2857	0.0263	5.80664	1260	21	0.0956851	0.00618498	0.0440714	0.087001	0.0454635	0.00521361	0.0667714	0.0542818	-0.0347574	0.0166762	0.0847733	0.0636145	0.154447	-0.0404593	0.0695977	0.144274	0.0670569	0.0980054	0.0339043	0.050101	0.0696459
20220225_WT_DYN	20220225	WT	WT_R2	TAUs	DYN	F	53.2857	0.0263	5.80664	1290	21.5	0.0699256	-0.014347	0.0137783	0.0626489	0.0478213	0.0315265	0.085465	0.0756509	-0.0230619	0.0351289	0.0944799	0.062552	0.0136121	0.0395727	0.0924064	0.0831927	0.0601713	0.0529445	0.0893649	0.08889	0.0691033
20220225_WT_DYN	20220225	WT	WT_R2	TAUs	DYN	F	53.2857	0.0263	5.80664	1320	22	0.0651737	0.0784252	0.0730423	0.0321573	0.104983	0.00433494	0.0766933	0.144501	0.0931321	0.0772719	0.0675958	0.10503	0.0471089	-0.00228475	0.0811276	0.108164	0.00110722	0.0317179	0.0396814	-0.00850795	0.0575253
20220225_WT_DYN	20220225	WT	WT_R2	TAUs	DYN	F	53.2857	0.0263	5.80664	1350	22.5	0.125563	0.0346324	0.0522213	0.0420099	0.0231951	0.0144787	0.0966305	0.0508	0.0312373	-0.000736046	0.128691	0.0617849	0.104986	-0.0100853	0.0895853	0.226442	0.0160981	0.0567682	0.0279173	0.0499111	0.0701276
20220225_WT_DYN	20220225	WT	WT_R2	TAUs	DYN	F	53.2857	0.0263	5.80664	1380	23	0.0776704	0.164911	0.110732	0.072279	0.0407877	-0.0370748	0.0528006	0.046825	0.00976403	-0.0183254	0.0819563	0.0988678	0.0664052	-0.019315	0.0962002	0.208605	0.0561531	0.0182523	0.0435435	-0.0100877	0.0795451
20220225_WT_DYN	20220225	WT	WT_R2	TAUs	DYN	F	53.2857	0.0263	5.80664	1410	23.5	0.155937	-0.0329775	0.0872626	0.051812	0.0571195	0.0703778	0.0774827	0.0771081	0.124374	0.0483807	0.0751866	0.0763679	0.187743	0.0276073	0.109534	0.17811	0.0315841	0.115284	0.0694044	0.118864	0.0869477
20220225_WT_DYN	20220225	WT	WT_R2	TAUs	DYN	F	53.2857	0.0263	5.80664	1440	24	0.0423267	-0.0124642	0.00123011	0.0842645	0.130025	0.0671781	0.0725885	0.147698	-0.0102461	0.0779894	0.0812361	0.0132183	-0.0333519	-0.0410759	0.0932057	0.187727	0.0434419	0.0297322	-0.00939502	0.0274751	0.069186
20220225_WT_DYN	20220225	WT	WT_R2	TAUs	DYN	F	53.2857	0.0263	5.80664	1470	24.5	0.0123398	-0.0320768	0.044657	0.0677644	0.0262082	0.220904	0.0993036	0.12579	0.235519	-0.0165546	0.0905699	0.0263132	0.24703	0.239295	0.102101	0.173808	0.132007	0.163591	0.0436548	0.0158361	0.0782651
20220225_WT_DYN	20220225	WT	WT_R2	TAUs	DYN	F	53.2857	0.0263	5.80664	1500	25	0.0956226	0.189824	0.0915998	0.0614803	0.0143476	0.121678	0.0764937	0.07223	0.11951	-0.0378213	0.116611	0.0714168	0.152158	-0.0388761	0.10147	0.0727063	0.0951113	0.099762	0.0316317	0.00647008	0.0751068
20220225_WT_DYN	20220225	WT	WT_R2	TAUs	DYN	F	53.2857	0.0263	5.80664	1530	25.5	0.0923143	0.000480532	0.0659938	0.0647671	0.0540258	0.160162	0.119327	0.170856	0.0624299	0.0281465	0.112037	0.108523	0.0493463	0.112902	0.0839627	0.0522705	0.145761	0.150105	0.0429619	0.104288	0.0808702
20220225_WT_DYN	20220225	WT	WT_R2	TAUs	DYN	F	53.2857	0.0263	5.80664	1560	26	0.0890189	-0.023986	0.139048	0.0732156	0.0284412	0.0601784	0.0811646	0.102953	0.0349314	0.0778694	0.161201	0.116086	0.0933883	0.0162322	0.0977688	0.21864	0.0744865	0.0354007	0.0470391	0.0918511	0.0979812
20220225_WT_DYN	20220225	WT	WT_R2	TAUs	DYN	F	53.2857	0.0263	5.80664	1590	26.5	0.164467	0.00976281	0.0116179	0.0542043	0.0910745	0.124931	0.141207	0.0416238	0.0451391	0.0493978	0.0882811	0.113002	0.0554744	0.012232	0.0892371	0.15489	0.036147	0.0689613	0.039717	0.107791	0.0833359
20220225_WT_DYN	20220225	WT	WT_R2	TAUs	DYN	F	53.2857	0.0263	5.80664	1620	27	0.0920979	0.0114631	0.138933	0.0539613	0.10866	0.0134117	0.0503209	0.0717495	0.13742	0.0700149	0.0338814	0.0914615	0.167829	-0.0184861	0.0960753	0.0987988	0.0313391	0.0522567	0.0517411	0.0235058	0.0711828
20220225_WT_DYN	20220225	WT	WT_R2	TAUs	DYN	F	53.2857	0.0263	5.80664	1650	27.5	0.0777462	0.0453442	0.0735887	0.0389633	0.00611875	0.185123	0.129893	0.110256	0.029336	-0.0130181	0.095728	0.0223697	0.131015	0.0148854	0.0836499	0.10206	0.0357883	0.147533	-0.00142692	0.0333725	0.0615832
20220225_WT_DYN	20220225	WT	WT_R2	TAUs	DYN	F	53.2857	0.0263	5.80664	1680	28	0.158814	0.158295	0.128263	0.0567998	0.0462807	0.13702	0.0974025	0.113195	0.123038	0.0423812	0.131588	0.0974236	0.22073	0.0938484	0.0858837	0.151379	0.0590202	0.115593	0.0803946	0.099801	0.0871701
20220225_WT_DYN	20220225	WT	WT_R2	TAUs	DYN	F	53.2857	0.0263	5.80664	1710	28.5	0.0247868	-0.0121241	0.00500209	0.0573002	0.000618935	0.0243557	0.112388	0.0744255	0.0222971	-0.0270977	0.0576668	0.0588852	0.0477877	0.000267795	0.0780662	0.132526	0.000426236	0.0425654	-0.0111152	0.0948159	0.0458424
20220225_WT_DYN	20220225	WT	WT_R2	TAUs	DYN	F	53.2857	0.0263	5.80664	1740	29	0.00154133	-0.049038	0.0565368	0.0281437	0.103702	0.262863	0.101708	0.109978	0.021996	0.0951705	0.0644745	0.0384973	0.092766	0.0773036	0.0629598	0.15346	0.00756068	0.151673	0.034887	0.14122	0.0626845
20220225_WT_DYN	20220225	WT	WT_R2	TAUs	DYN	F	53.2857	0.0263	5.80664	1770	29.5	0.0454741	0.106139	0.0983475	0.0551565	0.0446258	0.0153231	0.0780621	0.0615576	0.0103688	0.0498417	0.0658627	0.0246523	0.137863	0.14435	0.0791015	0.150503	0.0313487	0.0593414	0.0443198	0.0278241	0.0617096
20220302_PS19_DYN	20220302	PS19	PS19_M1	TAUs	DYN	M	60.4286	0.0207	4.84273	0	0	0.0104414		0.0365386	-0.0195424	-0.00539295	-5.99034e-06	-0.0255076	-0.00962966	-0.0142473		0.00768995	-0.0355669	0.0554441		0.00687087	0.0516509	-0.0296507	0.0325326	-0.036112	0.0376768	0
20220302_PS19_DYN	20220302	PS19	PS19_M1	TAUs	DYN	M	60.4286	0.0207	4.84273	30	0.5	0.0543358		0.0496297	-0.0293402	-0.00796995	0.124998	0.0422697	-0.0130241	0.0207874		-0.0236193	0.00124952	0.0894326		0.00442164	0.0526977	-0.0244039	-0.0162988	-0.0137619	0.0755072	0.00553923
20220302_PS19_DYN	20220302	PS19	PS19_M1	TAUs	DYN	M	60.4286	0.0207	4.84273	60	1	0.0164323		-0.0261747	-0.0140993	0.0501354	-0.0235782	-0.0131195	0.0200034	0.022936		-0.0349689	-0.0318275	-0.00257729		0.023381	0.003943	-0.0351646	-0.0278799	-0.00741671	-0.0324093	0.00121802
20220302_PS19_DYN	20220302	PS19	PS19_M1	TAUs	DYN	M	60.4286	0.0207	4.84273	90	1.5	0.00460686		-0.00444319	-0.0165083	-0.00124367	0.0615862	0.0202543	0.0456713	0.101621		-0.0284802	-0.025785	0.0863072		0.013036	0.0110672	-0.0163799	0.0803525	-0.0280868	-0.00393222	-0.00183541
20220302_PS19_DYN	20220302	PS19	PS19_M1	TAUs	DYN	M	60.4286	0.0207	4.84273	120	2	0.0295716		-0.00364715	-0.0198952	0.0394084	0.00975024	-0.00144686	-0.00888353	-0.0179788		0.00394164	-0.0252814	0.02835		0.00957266	0.0598192	-0.00973063	0.00266797	0.0244396	-0.0524583	0.00684633
20220302_PS19_DYN	20220302	PS19	PS19_M1	TAUs	DYN	M	60.4286	0.0207	4.84273	150	2.5	-0.00144618		-0.01542	-0.0150159	0.00698353	0.0275429	0.0215056	0.0697968	-0.0188095		0.0135753	0.0277367	-0.00956749		0.038482	0.0571588	0.0485233	-0.0287814	-0.000721691	0.0194214	0.00939222
20220302_PS19_DYN	20220302	PS19	PS19_M1	TAUs	DYN	M	60.4286	0.0207	4.84273	180	3	0.120235		0.0253548	0.00878594	0.0234055	-0.0449188	0.0102955	0.0148224	0.0172876		-0.0172974	-0.0153168	0.00921406		0.0454221	0.0174443	-0.0224451	-0.0275011	-0.0539267	-0.0219365	0.0132702
20220302_PS19_DYN	20220302	PS19	PS19_M1	TAUs	DYN	M	60.4286	0.0207	4.84273	210	3.5	0.107765		0.053578	0.00276391	0.0678474	0.116107	0.0441606	0.0201378	0.0124823		0.0215902	0.0660102	-0.010509		0.0433497	0.122077	0.0866678	0.0077856	-0.0098314	0.0201833	0.0358914
20220302_PS19_DYN	20220302	PS19	PS19_M1	TAUs	DYN	M	60.4286	0.0207	4.84273	240	4	0.164731		0.0422508	0.00144551	0.0378726	0.159949	0.0368774	-0.021568	-0.0440641		0.0555148	0.0465336	0.0558826		0.041572	0.0989399	-0.0115765	0.0333105	0.0160252	-0.0597744	0.0319352
20220302_PS19_DYN	20220302	PS19	PS19_M1	TAUs	DYN	M	60.4286	0.0207	4.84273	270	4.5	0.00670807		0.124473	0.0241433	0.0275958	-0.000107874	0.00948459	0.0435456	0.11122		0.0271753	0.0488856	0.0378281		0.0460149	0.0156211	-0.00642029	-0.0349225	-0.00308382	0.114042	0.0274275
20220302_PS19_DYN	20220302	PS19	PS19_M1	TAUs	DYN	M	60.4286	0.0207	4.84273	300	5	0.120725		0.0472889	0.0236329	0.0475721	0.0411121	0.0088572	-0.0108118	-0.0622902		0.00312952	0.105132	0.0484186		0.0523058	0.0760817	0.0209323	0.0527508	-0.010786	0.0270211	0.0383887
20220302_PS19_DYN	20220302	PS19	PS19_M1	TAUs	DYN	M	60.4286	0.0207	4.84273	330	5.5	0.0887		0.0303287	0.0212243	0.0756534	0.0804792	0.0473522	0.12114	0.0118083		0.00967401	0.0766166	0.0360126		0.0760765	0.0634271	0.0377524	0.01888	0.0574007	0.104934	0.0552271
20220302_PS19_DYN	20220302	PS19	PS19_M1	TAUs	DYN	M	60.4286	0.0207	4.84273	360	6	0.117898		0.079581	0.0408537	0.0435233	0.154668	0.107776	0.099487	0.460743		0.0839147	0.121476	0.133748		0.0776788	0.0615796	-0.00563773	0.068729	0.0256358	-0.0303235	0.0683804
20220302_PS19_DYN	20220302	PS19	PS19_M1	TAUs	DYN	M	60.4286	0.0207	4.84273	390	6.5	0.112351		0.155708	0.03792	0.0421993	0.0580616	0.0844397	0.024915	0.248654		0.0535156	0.191609	0.0253317		0.0961591	0.114615	0.0336784	-0.00159362	0.0272293	-0.0249624	0.07716
20220302_PS19_DYN	20220302	PS19	PS19_M1	TAUs	DYN	M	60.4286	0.0207	4.84273	420	7	0.101593		0.166368	0.0290549	0.0697121	0.0509686	0.0536728	0.0248777	0.0961675		0.0730751	0.149653	0.0994119		0.0821408	0.211267	0.0767691	0.0489761	0.0721229	-0.0281343	0.0778986
20220302_PS19_DYN	20220302	PS19	PS19_M1	TAUs	DYN	M	60.4286	0.0207	4.84273	450	7.5	0.232619		0.133724	0.0128427	0.0704866	-0.0112254	0.0513038	0.164328	0.122255		0.0819026	0.0456454	0.100667		0.0953941	0.167634	-0.0222356	0.0297868	0.0765824	0.192834	0.0738365
20220302_PS19_DYN	20220302	PS19	PS19_M1	TAUs	DYN	M	60.4286	0.0207	4.84273	480	8	0.131389		0.235401	0.0945612	0.0764275	0.064482	0.0890318	0.0574986	0.0306871		0.0506554	0.155004	0.214252		0.115459	0.2206	0.0768075	0.112764	0.0673421	0.045302	0.100902
20220302_PS19_DYN	20220302	PS19	PS19_M1	TAUs	DYN	M	60.4286	0.0207	4.84273	510	8.5	0.180792		0.144746	0.0350945	0.0732926	0.172917	0.0827004	0.192205	0.0325698		0.0645425	0.126118	0.129695		0.142545	0.209581	0.0223161	0.111484	-0.00621918	0.151532	0.0853724
20220302_PS19_DYN	20220302	PS19	PS19_M1	TAUs	DYN	M	60.4286	0.0207	4.84273	540	9	0.136221		0.264297	0.0946943	0.112764	0.0608562	0.108	0.0908387	0.129994		0.0879525	0.100659	0.166532		0.115099	0.22968	0.0486339	0.0849592	0.0500155	0.0113915	0.110915
20220302_PS19_DYN	20220302	PS19	PS19_M1	TAUs	DYN	M	60.4286	0.0207	4.84273	570	9.5	0.114006		0.0999954	0.0764598	0.0664566	0.0300001	0.063	0.0683207	-0.0264858		0.088213	0.179494	0.183355		0.165142	0.149784	0.146115	0.116168	0.0625217	0.0588599	0.110965
20220302_PS19_DYN	20220302	PS19	PS19_M1	TAUs	DYN	M	60.4286	0.0207	4.84273	600	10	0.235184		0.172251	0.133511	0.152251	0.259819	0.131822	0.203112	0.0849746		0.116168	0.125994	0.176822		0.138983	0.207042	0.132114	0.241834	0.133917	0.270757	0.172461
20220302_PS19_DYN	20220302	PS19	PS19_M1	TAUs	DYN	M	60.4286	0.0207	4.84273	630	10.5	0.189491		0.234767	0.078021	0.146779	0.142173	0.104757	0.239355	0.395646		0.0593431	0.0992095	0.234226		0.175998	0.221152	0.111286	0.166206	0.0640671	0.256807	0.11808
20220302_PS19_DYN	20220302	PS19	PS19_M1	TAUs	DYN	M	60.4286	0.0207	4.84273	660	11	0.183599		0.272161	0.123343	0.0964518	0.0296826	0.120533	0.225298	0.215001		0.152823	0.315448	0.286934		0.19332	0.29214	0.113251	0.131085	0.0763902	0.11638	0.152452
20220302_PS19_DYN	20220302	PS19	PS19_M1	TAUs	DYN	M	60.4286	0.0207	4.84273	690	11.5	0.238201		0.235377	0.0995437	0.0919841	0.2673	0.175295	0.09139	0.0615407		0.150651	0.121613	0.32734		0.192954	0.218633	0.291681	0.203525	0.0932281	0.140508	0.158525
20220302_PS19_DYN	20220302	PS19	PS19_M1	TAUs	DYN	M	60.4286	0.0207	4.84273	720	12	0.344582		0.375026	0.157637	0.171204	0.170104	0.152032	0.236723	0.130766		0.139276	0.174221	0.131669		0.244182	0.253538	0.154773	0.158509	0.0915058	0.121414	0.183432
20220302_PS19_DYN	20220302	PS19	PS19_M1	TAUs	DYN	M	60.4286	0.0207	4.84273	750	12.5	0.414702		0.281908	0.161089	0.219667	0.0700559	0.161052	0.131923	0.0471667		0.150113	0.259162	0.268498		0.252903	0.296118	0.196826	0.212321	0.0783386	0.0735191	0.209927
20220302_PS19_DYN	20220302	PS19	PS19_M1	TAUs	DYN	M	60.4286	0.0207	4.84273	780	13	0.273134		0.358848	0.150581	0.221032	0.0973143	0.176498	0.218384	0.248738		0.214262	0.31372	0.359848		0.239169	0.235595	0.200884	0.419364	0.213554	0.284682	0.227102
20220302_PS19_DYN	20220302	PS19	PS19_M1	TAUs	DYN	M	60.4286	0.0207	4.84273	810	13.5	0.346366		0.142097	0.192038	0.290449	0.0995298	0.115824	0.250495	0.0542336		0.161317	0.270601	0.173		0.244964	0.340117	0.08791	0.0800263	0.143706	0.634718	0.205189
20220302_PS19_DYN	20220302	PS19	PS19_M1	TAUs	DYN	M	60.4286	0.0207	4.84273	840	14	0.411219		0.348291	0.222196	0.150541	0.121991	0.143314	0.171707	0.139283		0.212709	0.351304	0.271566		0.274733	0.382577	0.196645	0.182698	0.179523	0.318973	0.240359
20220302_PS19_DYN	20220302	PS19	PS19_M1	TAUs	DYN	M	60.4286	0.0207	4.84273	870	14.5	0.383388		0.279655	0.19838	0.150443	0.0898187	0.296779	0.145372	0.0592153		0.231095	0.328417	0.276211		0.293912	0.319873	0.183621	0.307193	0.184629	0.0747282	0.238599
20220302_PS19_DYN	20220302	PS19	PS19_M1	TAUs	DYN	M	60.4286	0.0207	4.84273	900	15	0.467058		0.40629	0.211749	0.188681	0.0796747	0.192658	0.180158	0.299326		0.190216	0.292606	0.354658		0.30332	0.428773	0.290217	0.120325	0.25991	0.217	0.25582
20220302_PS19_DYN	20220302	PS19	PS19_M1	TAUs	DYN	M	60.4286	0.0207	4.84273	930	15.5	0.458647		0.354058	0.259581	0.222121	0.205677	0.18583	0.164126	0.0363061		0.24207	0.268965	0.370654		0.309952	0.486726	0.193965	0.337457	0.151674	0.208924	0.257978
20220302_PS19_DYN	20220302	PS19	PS19_M1	TAUs	DYN	M	60.4286	0.0207	4.84273	960	16	0.384311		0.376865	0.188328	0.230811	0.200143	0.285087	0.125921	0.0644553		0.164329	0.410536	0.145		0.298316	0.337331	0.251219	0.179522	0.235001	0.115052	0.25444
20220302_PS19_DYN	20220302	PS19	PS19_M1	TAUs	DYN	M	60.4286	0.0207	4.84273	990	16.5	0.38239		0.355529	0.205728	0.306814	0.313739	0.301886	0.200701	0.0469515		0.257632	0.421227	0.35429		0.328286	0.440251	0.179804	0.42695	0.28865	0.157224	0.306168
20220302_PS19_DYN	20220302	PS19	PS19_M1	TAUs	DYN	M	60.4286	0.0207	4.84273	1020	17	0.488687		0.447116	0.232911	0.219606	0.412638	0.309569	0.223813	0.239918		0.236495	0.430234	0.333452		0.346023	0.602808	0.252029	0.491203	0.241682	0.0980797	0.305762
20220302_PS19_DYN	20220302	PS19	PS19_M1	TAUs	DYN	M	60.4286	0.0207	4.84273	1050	17.5	0.56798		0.364737	0.165427	0.390065	0.237899	0.289669	0.344823	0.390776		0.362009	0.29645	0.337236		0.367889	0.583835	0.329809	0.308219	0.26382	0.0924502	0.338955
20220302_PS19_DYN	20220302	PS19	PS19_M1	TAUs	DYN	M	60.4286	0.0207	4.84273	1080	18	0.478649		0.399503	0.256823	0.294696	0.369458	0.306134	0.225779	0.275326		0.264476	0.319428	0.318372		0.355755	0.58447	0.148263	0.345019	0.197144	0.370221	0.304678
20220302_PS19_DYN	20220302	PS19	PS19_M1	TAUs	DYN	M	60.4286	0.0207	4.84273	1110	18.5	0.374175		0.407651	0.270407	0.301829	0.479135	0.28344	0.329253	0.350984		0.275805	0.288741	0.527381		0.363319	0.457002	0.332339	0.436839	0.265406	0.294814	0.317412
20220302_PS19_DYN	20220302	PS19	PS19_M1	TAUs	DYN	M	60.4286	0.0207	4.84273	1140	19	0.384936		0.438478	0.274513	0.310999	0.30295	0.288471	0.219072	0.250415		0.328885	0.387157	0.251819		0.327825	0.527757	0.357222	0.394786	0.364573	0.136633	0.341671
20220302_PS19_DYN	20220302	PS19	PS19_M1	TAUs	DYN	M	60.4286	0.0207	4.84273	1170	19.5	0.45466		0.511536	0.217617	0.433005	0.173058	0.368862	0.22927	0.0542362		0.259766	0.555103	0.364952		0.38414	0.450161	0.327809	0.212421	0.248721	0.177299	0.333373
20220302_PS19_DYN	20220302	PS19	PS19_M1	TAUs	DYN	M	60.4286	0.0207	4.84273	1200	20	0.645285		0.364958	0.278396	0.272488	0.344287	0.371264	0.276966	0.132672		0.332555	0.441759	0.412769		0.410668	0.550841	0.394948	0.397716	0.236549	0.222706	0.34867
20220302_PS19_DYN	20220302	PS19	PS19_M1	TAUs	DYN	M	60.4286	0.0207	4.84273	1230	20.5	0.476575		0.495349	0.296946	0.302676	0.483982	0.405079	0.209738	0.181128		0.238948	0.451762	0.32629		0.368036	0.5855	0.399397	0.493726	0.229118	0.0933381	0.360939
20220302_PS19_DYN	20220302	PS19	PS19_M1	TAUs	DYN	M	60.4286	0.0207	4.84273	1260	21	0.514022		0.443505	0.196265	0.30354	0.213726	0.291358	0.46087	0.110732		0.277332	0.465466	0.21466		0.44061	0.560806	0.189299	0.288437	0.204792	0.585606	0.32453
20220302_PS19_DYN	20220302	PS19	PS19_M1	TAUs	DYN	M	60.4286	0.0207	4.84273	1290	21.5	0.506162		0.302745	0.265454	0.341348	0.396542	0.335369	0.247971	0.365926		0.285766	0.387778	0.491761		0.39156	0.551778	0.222391	0.535849	0.296972	0.222703	0.340192
20220302_PS19_DYN	20220302	PS19	PS19_M1	TAUs	DYN	M	60.4286	0.0207	4.84273	1320	22	0.567084		0.414936	0.326101	0.272244	0.271026	0.27933	0.402738	0.523714		0.238	0.431393	0.377792		0.38628	0.64647	0.378979	0.332836	0.293391	0.177027	0.354815
20220302_PS19_DYN	20220302	PS19	PS19_M1	TAUs	DYN	M	60.4286	0.0207	4.84273	1350	22.5	0.620485		0.486532	0.276751	0.272929	0.195804	0.343947	0.462816	0.327997		0.322688	0.573132	0.503926		0.392347	0.531328	0.298199	0.273712	0.221627	0.387432	0.353974
20220302_PS19_DYN	20220302	PS19	PS19_M1	TAUs	DYN	M	60.4286	0.0207	4.84273	1380	23	0.413773		0.441615	0.268688	0.243222	0.339508	0.352581	0.345721	0.330397		0.31497	0.689228	0.386104		0.437486	0.586646	0.271925	0.288266	0.245818	0.290215	0.344453
20220302_PS19_DYN	20220302	PS19	PS19_M1	TAUs	DYN	M	60.4286	0.0207	4.84273	1410	23.5	0.455384		0.347366	0.275418	0.275531	0.426834	0.316302	0.359394	0.198573		0.293306	0.515334	0.394031		0.375845	0.524119	0.343083	0.538617	0.241975	0.0768733	0.330506
20220302_PS19_DYN	20220302	PS19	PS19_M1	TAUs	DYN	M	60.4286	0.0207	4.84273	1440	24	0.465325		0.534765	0.288323	0.409217	0.230206	0.376302	0.285422	0.241037		0.22128	0.472855	0.583361		0.383183	0.487599	0.286433	0.321126	0.336101	0.19876	0.359931
20220302_PS19_DYN	20220302	PS19	PS19_M1	TAUs	DYN	M	60.4286	0.0207	4.84273	1470	24.5	0.49728		0.573543	0.201561	0.314231	0.274214	0.361064	0.331017	0.239844		0.258245	0.38874	0.28429		0.450537	0.470146	0.178547	0.345042	0.232912	0.201626	0.344753
20220302_PS19_DYN	20220302	PS19	PS19_M1	TAUs	DYN	M	60.4286	0.0207	4.84273	1500	25	0.334781		0.398714	0.233053	0.385565	0.200552	0.274473	0.464852	0.907321		0.379656	0.375271	0.420495		0.407209	0.759491	0.340784	0.31541	0.373341	0.259201	0.365617
20220302_PS19_DYN	20220302	PS19	PS19_M1	TAUs	DYN	M	60.4286	0.0207	4.84273	1530	25.5	0.525294		0.339438	0.234244	0.42365	0.385389	0.351085	0.17203	0.134938		0.256096	0.520328	0.617734		0.380867	0.582358	0.460189	0.330596	0.348507	0.392502	0.373052
20220302_PS19_DYN	20220302	PS19	PS19_M1	TAUs	DYN	M	60.4286	0.0207	4.84273	1560	26	0.419398		0.439631	0.225584	0.321118	0.657166	0.316852	0.475123	0.342874		0.326371	0.235268	0.398969		0.442766	0.608717	0.278493	0.476289	0.340972	0.418383	0.367427
20220302_PS19_DYN	20220302	PS19	PS19_M1	TAUs	DYN	M	60.4286	0.0207	4.84273	1590	26.5	0.638291		0.496867	0.216338	0.319165	0.171921	0.281952	0.368293	0.268657		0.358573	0.546755	0.45595		0.414304	0.61035	0.310252	0.328612	0.210334	0.146426	0.341991
20220302_PS19_DYN	20220302	PS19	PS19_M1	TAUs	DYN	M	60.4286	0.0207	4.84273	1620	27	0.582873		0.439391	0.265333	0.37447	0.470198	0.422853	0.382364	0.391396		0.399533	0.445488	0.403302		0.392395	0.610194	0.410567	0.440532	0.316315	0.491182	0.384559
20220302_PS19_DYN	20220302	PS19	PS19_M1	TAUs	DYN	M	60.4286	0.0207	4.84273	1650	27.5	0.470079		0.479822	0.286904	0.302808	0.200008	0.335379	0.349184	0.59227		0.315276	0.548133	0.63577		0.380895	0.525726	0.269296	0.418863	0.23579	0.234973	0.333681
20220302_PS19_DYN	20220302	PS19	PS19_M1	TAUs	DYN	M	60.4286	0.0207	4.84273	1680	28	0.429197		0.238437	0.208684	0.283455	0.348062	0.329179	0.310891	0.11838		0.366672	0.512799	0.453722		0.42874	0.681255	0.222635	0.333255	0.270878	0.288724	0.330295
20220302_PS19_DYN	20220302	PS19	PS19_M1	TAUs	DYN	M	60.4286	0.0207	4.84273	1710	28.5	0.442437		0.566656	0.213706	0.38713	0.426992	0.355632	0.347662	0.14881		0.338756	0.442997	0.573546		0.429377	0.6055	0.377678	0.379451	0.230251	0.385822	0.353134
20220302_PS19_DYN	20220302	PS19	PS19_M1	TAUs	DYN	M	60.4286	0.0207	4.84273	1740	29	0.614567		0.40286	0.227268	0.328344	0.159735	0.299075	0.37755	0.311071		0.40112	0.467947	0.436649		0.398472	0.531628	0.212879	0.549502	0.251628	0.152186	0.332446
20220302_PS19_DYN	20220302	PS19	PS19_M1	TAUs	DYN	M	60.4286	0.0207	4.84273	1770	29.5	0.525704		0.387347	0.258348	0.378721	0.352727	0.36018	0.293534	0.272268		0.324735	0.490341	0.476303		0.38718	0.650425	0.265285	0.300053	0.251181	0.270096	0.366675
20220302_WT_DYN	20220302	WT	WT_LR	TAUs	DYN	M	60.4286	0.0483	5.52989	0	0	0.0172204	-0.023041	-0.0139649	0.00685251	-0.0206575	-0.00174077	-0.00258263	-0.0122219	0.00746855	0.000936377	0.00628052	0.00175489	0.0215812		-0.00600343	0.0359039	-0.0156575	0.0383113	-3.49896e-05	0.0142492	0
20220302_WT_DYN	20220302	WT	WT_LR	TAUs	DYN	M	60.4286	0.0483	5.52989	30	0.5	0.0274904	0.121658	0.0321609	0.00236298	0.0064111	0.00018648	-0.000941656	-0.00299834	-0.0119847	-0.00197128	0.00305605	0.0321911	0.0051401		0.00683679	0.0218855	0.0367316	0.0312114	0.0135458	0.032181	0.010692
20220302_WT_DYN	20220302	WT	WT_LR	TAUs	DYN	M	60.4286	0.0483	5.52989	60	1	0.0335172	0.026551	0.0180631	-0.00330828	0.0077236	0.0697322	0.00686164	0.0300286	-0.0174434	0.0109584	-0.000918137	0.00742942	0.00715878		0.0116383	0.0152739	-0.00357396	0.0230867	0.00427288	0.00181787	0.00729337
20220302_WT_DYN	20220302	WT	WT_LR	TAUs	DYN	M	60.4286	0.0483	5.52989	90	1.5	0.0516229	-0.014454	0.0264064	0.0064106	0.00109886	0.100602	0.0223274	-0.00201696	-0.0201473	0.025482	-0.000905569	0.0479569	0.0316774		0.0180419	0.0418609	0.00731259	0.0412345	0.0137472	0.0255215	0.0115991
20220302_WT_DYN	20220302	WT	WT_LR	TAUs	DYN	M	60.4286	0.0483	5.52989	120	2	0.00620528	-0.011325	0.0394715	0.0207955	-0.0107978	0.0130375	0.0277616	0.0211485	0.0237944	0.0206769	0.00281437	0.0116955	-0.000807308		0.0134087	0.0262123	0.0424662	0.0792123	0.00447648	-0.00665481	0.0169858
20220302_WT_DYN	20220302	WT	WT_LR	TAUs	DYN	M	60.4286	0.0483	5.52989	150	2.5	0.00259882	0.0677217	0.0485644	0.00752586	0.000609689	-0.0157474	0.00260563	0.0374025	0.0109452	0.0199017	0.0328522	0.0308396	0.0183413		0.0161364	0.0253904	0.0199092	0.0233572	0.0367344	0.00180395	0.0153585
20220302_WT_DYN	20220302	WT	WT_LR	TAUs	DYN	M	60.4286	0.0483	5.52989	180	3	0.0216138	0.00193226	0.0803362	0.00446499	0.0106209	0.00535867	0.0146466	0.010913	-0.0110073	0.0268312	0.0197969	0.00846899	0.0653179		0.0150004	0.0621626	0.00721329	0.0295677	0.00297126	0.00582942	0.0140123
20220302_WT_DYN	20220302	WT	WT_LR	TAUs	DYN	M	60.4286	0.0483	5.52989	210	3.5	0.0352139	-0.020188	0.0225808	0.0455891	0.0163011	-0.00455137	0.0254635	0.0498876	0.0673011	0.0584303	0.0251341	0.0246127	0.000892629		0.0301006	0.0272711	0.0137531	0.00152418	0.022706	0.0184688	0.0295343
20220302_WT_DYN	20220302	WT	WT_LR	TAUs	DYN	M	60.4286	0.0483	5.52989	240	4	0.00766509	0.0815104	0.0208109	0.011584	-0.00936191	-0.00506265	0.0375264	0.0219968	-0.00534433	-0.010441	0.0110137	0.0534414	-0.0103791		0.0274588	0.0629339	0.0149655	0.0329873	-0.00106708	0.00558139	0.0133318
20220302_WT_DYN	20220302	WT	WT_LR	TAUs	DYN	M	60.4286	0.0483	5.52989	270	4.5	0.0889884	0.112077	0.0339251	0.0169932	0.0347525	0.00657553	0.0313514	0.0148686	0.0247363	0.00395882	0.0333994	0.0448386	0.0241208		0.0282413	0.0432849	0.00633248	0.0325164	0.012732	-0.00706087	0.024249
20220302_WT_DYN	20220302	WT	WT_LR	TAUs	DYN	M	60.4286	0.0483	5.52989	300	5	0.0232383	-0.00967886	0.0181973	0.029124	0.00978333	0.0867098	0.0292302	0.0148578	-0.0116677	-0.00298077	0.0295971	0.0611041	0.0207431		0.0357515	0.0511675	0.0304894	0.0576463	0.0124797	0.0195219	0.026369
20220302_WT_DYN	20220302	WT	WT_LR	TAUs	DYN	M	60.4286	0.0483	5.52989	330	5.5	0.0634901	0.00583017	0.0380984	0.0272919	0.0200275	0.0303439	0.0209592	0.0250808	0.0156132	0.0496964	0.0362978	0.113221	0.0141223		0.0282584	0.0536388	0.0842546	0.0360036	0.0632054	0.035488	0.0363749
20220302_WT_DYN	20220302	WT	WT_LR	TAUs	DYN	M	60.4286	0.0483	5.52989	360	6	0.0382932	0.0319982	0.0515094	0.072013	0.0159658	0.0344484	0.0491243	0.0331602	-0.00817237	0.00200153	0.0638541	0.0622158	0.0958021		0.0393031	0.048064	0.0278952	0.0314411	0.0366975	0.0401745	0.0438502
20220302_WT_DYN	20220302	WT	WT_LR	TAUs	DYN	M	60.4286	0.0483	5.52989	390	6.5	0.0712303	-0.00341166	0.0551389	0.0317436	0.0276564	0.0143498	0.0134366	0.0108272	0.0226295	0.0359549	0.0214161	0.0905525	0.0309797		0.0468683	0.0823212	0.023239	0.030348	0.0013306	0.0130836	0.0298829
20220302_WT_DYN	20220302	WT	WT_LR	TAUs	DYN	M	60.4286	0.0483	5.52989	420	7	0.015634	0.0069352	0.0221347	0.0448133	0.0613765	0.0428318	0.017725	0.0306716	0.095481	0.02515	0.0337528	0.057968	0.132835		0.0565419	0.0937324	0.0537791	0.0539951	0.0268102	0.0408827	0.0441278
20220302_WT_DYN	20220302	WT	WT_LR	TAUs	DYN	M	60.4286	0.0483	5.52989	450	7.5	0.0550483	-0.0171098	0.0269381	0.0364847	0.0319669	0.0270911	0.013783	0.0556646	0.112839	0.0401005	0.0567912	0.0769949	0.110559		0.058652	0.0714727	0.0160049	0.120585	0.0568593	0.0383022	0.0436014
20220302_WT_DYN	20220302	WT	WT_LR	TAUs	DYN	M	60.4286	0.0483	5.52989	480	8	0.0560838	-0.0181338	0.0317774	0.0332496	0.0361177	0.0266998	0.022224	0.0751104	0.0654541	0.0272356	0.0566031	0.0685294	0.190104		0.0585772	0.0916925	0.0123111	0.104056	0.028383	0.0381645	0.0393328
20220302_WT_DYN	20220302	WT	WT_LR	TAUs	DYN	M	60.4286	0.0483	5.52989	510	8.5	0.0543553	0.0465868	0.037539	0.0477052	0.0163506	0.0198784	0.0223009	0.040824	-0.00908717	0.0171226	0.0269356	0.107519	0.0620068		0.0574004	0.137476	0.00542369	0.0994719	0.0177681	0.018641	0.0399518
20220302_WT_DYN	20220302	WT	WT_LR	TAUs	DYN	M	60.4286	0.0483	5.52989	540	9	0.0925305	0.0538454	0.0709807	0.0501587	0.0411467	0.0143469	0.058217	0.0375008	0.0423796	0.0267005	0.0396157	0.0800504	0.161356		0.0740573	0.119307	0.0218593	0.084762	0.0143382	0.0584518	0.049578
20220302_WT_DYN	20220302	WT	WT_LR	TAUs	DYN	M	60.4286	0.0483	5.52989	570	9.5	0.12886	0.106829	0.0774482	0.0623577	0.0325089	0.00965867	0.0305145	0.0386093	-0.0203184	0.153294	0.0465498	0.122517	0.0359559		0.0524544	0.0683646	0.0596109	0.0144337	0.0743737	0.0175839	0.0563591
20220302_WT_DYN	20220302	WT	WT_LR	TAUs	DYN	M	60.4286	0.0483	5.52989	600	10	0.0393741	0.10528	0.0661634	0.0756177	0.0473353	0.0605606	0.0616592	0.0766767	0.0408535	0.0484474	0.0640295	0.0819038	0.0135018		0.054554	0.0473043	0.0702367	0.0730989	0.0815689	0.102967	0.0687925
20220302_WT_DYN	20220302	WT	WT_LR	TAUs	DYN	M	60.4286	0.0483	5.52989	630	10.5	0.045491	0.0753028	0.0718584	0.0635364	0.0485301	0.0615194	0.0534951	0.0543946	0.0266834	0.00788741	0.0577004	0.0559908	0.0780625		0.0729042	0.0924851	0.0344704	0.0878701	0.0770766	0.0805562	0.0616471
20220302_WT_DYN	20220302	WT	WT_LR	TAUs	DYN	M	60.4286	0.0483	5.52989	660	11	0.0988592	0.0338189	0.0387458	0.0482029	0.0500455	0.0706291	0.0398393	0.0839542	0.0106534	0.0220584	0.0466265	0.080176	0.177895		0.0814664	0.0897754	0.0740614	0.14755	0.0537435	0.0486275	0.055259
20220302_WT_DYN	20220302	WT	WT_LR	TAUs	DYN	M	60.4286	0.0483	5.52989	690	11.5	0.128124	0.0482758	0.0784464	0.0699257	0.0636243	0.0786	0.0801254	0.0932942	0.0205552	0.0909403	0.0686024	0.0607202	0.0295481		0.0775461	0.12149	0.0423803	0.0664193	0.0159365	0.0273892	0.0639525
20220302_WT_DYN	20220302	WT	WT_LR	TAUs	DYN	M	60.4286	0.0483	5.52989	720	12	0.117001	0.0730175	0.0801923	0.0255945	0.0513875	0.0046941	0.0632165	0.0616022	-0.000243913	0.14804	0.0556148	0.0613752	0.100603		0.0690572	0.124035	0.056012	0.0811524	0.0588004	0.0328742	0.0560221
20220302_WT_DYN	20220302	WT	WT_LR	TAUs	DYN	M	60.4286	0.0483	5.52989	750	12.5	0.0508178	0.0203766	0.0480814	0.0496524	0.0825294	0.10358	0.0975718	0.0418899	0.210026	0.0467431	0.0886194	0.0999322	0.165851		0.0896529	0.112787	0.0526506	0.135568	0.0809995	0.0768351	0.0673988
20220302_WT_DYN	20220302	WT	WT_LR	TAUs	DYN	M	60.4286	0.0483	5.52989	780	13	0.046954	0.0426091	0.0774432	0.055799	0.0939224	0.0622808	0.0595562	0.0887194	0.0482864	0.0621799	0.0540821	0.0653945	0.135635		0.088226	0.117216	0.0315659	0.250501	0.0271161	0.0771526	0.0659898
20220302_WT_DYN	20220302	WT	WT_LR	TAUs	DYN	M	60.4286	0.0483	5.52989	810	13.5	0.139341	0.103781	0.131941	0.0724007	0.0592469	0.0281548	0.037172	0.0849953	0.0404442	0.116576	0.100608	0.0890173	0.113067		0.104074	0.0832818	0.0420677	0.105683	0.0631735	0.0297172	0.071163
20220302_WT_DYN	20220302	WT	WT_LR	TAUs	DYN	M	60.4286	0.0483	5.52989	840	14	0.070718	0.0280645	0.0862966	0.0694204	0.0708405	0.0164813	0.066208	0.0959464	0.0633128	0.0415793	0.0741351	0.0337441	0.0387532		0.0992723	0.0778226	0.0402712	0.0771324	0.0743119	0.0259051	0.0647295
20220302_WT_DYN	20220302	WT	WT_LR	TAUs	DYN	M	60.4286	0.0483	5.52989	870	14.5	0.0550074	0.066296	0.101555	0.0566607	0.109344	0.0221888	0.0668108	0.049317	0.0500396	0.109067	0.090064	0.149215	0.116953		0.0905884	0.14136	0.0396048	0.0725178	0.0723577	0.039955	0.0789064
20220302_WT_DYN	20220302	WT	WT_LR	TAUs	DYN	M	60.4286	0.0483	5.52989	900	15	0.104874	0.0181593	0.0866054	0.0531402	0.0510965	0.0603609	0.0559177	0.0909802	0.0609519	0.104993	0.109735	0.0991465	0.0788486		0.0983105	0.0961355	0.0409375	0.0496105	0.0578911	0.0550498	0.0657935
20220302_WT_DYN	20220302	WT	WT_LR	TAUs	DYN	M	60.4286	0.0483	5.52989	930	15.5	0.0754188	0.0185793	0.0415605	0.0665419	0.0760469	0.0858963	0.055997	0.0847226	0.0389291	0.0452534	0.0890906	0.102151	0.0787852		0.0898633	0.147147	0.0643716	0.144819	0.091861	0.0746332	0.0865304
20220302_WT_DYN	20220302	WT	WT_LR	TAUs	DYN	M	60.4286	0.0483	5.52989	960	16	0.148121	0.033831	0.0956004	0.0656181	0.0583862	0.0778669	0.0820273	0.0715735	-0.0204742	0.0731816	0.0763643	0.114937	0.0683648		0.0959065	0.101906	0.0952678	0.131302	0.0639814	0.0246476	0.0752387
20220302_WT_DYN	20220302	WT	WT_LR	TAUs	DYN	M	60.4286	0.0483	5.52989	990	16.5	0.100703	0.046585	0.0758161	0.0616916	0.0781374	0.033433	0.0866429	0.105086	0.0304517	0.0371675	0.161401	0.0837773	0.0662369		0.0956484	0.143167	0.0593627	0.0679705	0.0705591	0.0838127	0.0826228
20220302_WT_DYN	20220302	WT	WT_LR	TAUs	DYN	M	60.4286	0.0483	5.52989	1020	17	0.118196	-0.0176247	0.110084	0.0658211	0.0776512	0.0231525	0.0687103	0.0605162	0.0765054	0.0824888	0.093774	0.120068	0.097587		0.0899132	0.11364	0.067205	0.0740762	0.0258546	0.0594725	0.0688712
20220302_WT_DYN	20220302	WT	WT_LR	TAUs	DYN	M	60.4286	0.0483	5.52989	1050	17.5	0.114731	0.0586022	0.123039	0.0675834	0.0702187	0.017619	0.0966235	0.0894842	0.0693911	0.137968	0.0735043	0.100182	0.0998554		0.0947449	0.150509	0.0393117	0.156568	0.0132902	0.013941	0.0731459
20220302_WT_DYN	20220302	WT	WT_LR	TAUs	DYN	M	60.4286	0.0483	5.52989	1080	18	0.133667	0.0133043	0.125745	0.0574609	0.0358868	0.00860648	0.0558101	0.127436	0.150774	0.0508872	0.086047	0.157045	0.0785655		0.10492	0.130067	0.0127759	0.0703468	0.0306786	0.0915524	0.0689601
20220302_WT_DYN	20220302	WT	WT_LR	TAUs	DYN	M	60.4286	0.0483	5.52989	1110	18.5	0.0629227	0.00427257	0.0577428	0.0782049	0.0532622	0.0502316	0.0612794	0.0738655	0.0785962	0.0935656	0.0650494	0.066372	0.035973		0.0812963	0.130582	0.1167	0.106892	0.100192	0.0447937	0.0723788
20220302_WT_DYN	20220302	WT	WT_LR	TAUs	DYN	M	60.4286	0.0483	5.52989	1140	19	0.0631303	0.251162	0.093262	0.0381809	0.0309621	0.0349025	0.0572815	0.0944267	0.00153027	0.0430646	0.0972628	0.161013	0.145635		0.107907	0.138083	0.0422887	0.12225	0.0540894	0.0508126	0.0733495
20220302_WT_DYN	20220302	WT	WT_LR	TAUs	DYN	M	60.4286	0.0483	5.52989	1170	19.5	0.153859	0.0490158	0.0497961	0.0693493	0.0940995	0.0235361	0.0676711	0.0646783	0.0895995	0.0914398	0.0826638	0.065111	0.112866		0.088634	0.0750327	0.0596042	0.124433	0.0673318	0.116644	0.0739751
20220302_WT_DYN	20220302	WT	WT_LR	TAUs	DYN	M	60.4286	0.0483	5.52989	1200	20	0.059775	0.00365478	0.118513	0.0655794	0.0659564	0.0108784	0.0397493	0.0715333	0.00440936	0.00910083	0.0654551	0.0620479	0.113109		0.111567	0.10266	0.0579112	0.107123	0.0357782	0.0464963	0.0642565
20220302_WT_DYN	20220302	WT	WT_LR	TAUs	DYN	M	60.4286	0.0483	5.52989	1230	20.5	0.0968788	0.0639416	0.117804	0.0869994	0.0835079	0.0609694	0.0736883	0.110818	0.102109	0.0227684	0.0557653	0.0612991	0.195607		0.0950253	0.0660801	0.0539905	0.0931712	0.035184	0.0701122	0.0764319
20220302_WT_DYN	20220302	WT	WT_LR	TAUs	DYN	M	60.4286	0.0483	5.52989	1260	21	0.0578627	-0.0117722	0.0420146	0.0507698	0.067042	0.0574507	0.0564952	0.0387605	0.00357222	0.076796	0.0638155	0.0204731	0.0935672		0.0750773	0.0623889	0.0401607	0.0708807	0.0561881	0.050816	0.0531506
20220302_WT_DYN	20220302	WT	WT_LR	TAUs	DYN	M	60.4286	0.0483	5.52989	1290	21.5	0.0722687	0.0644732	0.0779432	0.0606901	0.0799518	0.026696	0.101749	0.140775	0.0909064	0.0878601	0.0450197	0.098169	0.192335		0.0923954	0.0902746	0.0301934	0.185984	0.0686065	0.0495183	0.07177
20220302_WT_DYN	20220302	WT	WT_LR	TAUs	DYN	M	60.4286	0.0483	5.52989	1320	22	0.0608854	0.190691	0.074804	0.0563565	0.0703751	0.00895712	0.0605964	0.0847581	0.0160873	0.0548835	0.0712023	0.0776007	0.100716		0.0871563	0.0866401	0.0547752	0.0728618	0.0619069	0.045826	0.0622031
20220302_WT_DYN	20220302	WT	WT_LR	TAUs	DYN	M	60.4286	0.0483	5.52989	1350	22.5	0.125085	0.0287049	0.107993	0.0656009	0.0829485	0.17717	0.0639219	0.0475544	0.0457519	0.141128	0.0493331	0.0954573	0.122483		0.081992	0.113342	0.0878025	0.127915	0.059596	0.0619761	0.0746485
20220302_WT_DYN	20220302	WT	WT_LR	TAUs	DYN	M	60.4286	0.0483	5.52989	1380	23	0.128161	0.209019	0.104376	0.0783386	0.0726889	0.106209	0.0536265	0.0667446	0.0284098	0.145583	0.0621707	0.158731	0.197148		0.0983945	0.181293	0.0357834	0.103274	0.0729659	0.0389618	0.0709746
20220302_WT_DYN	20220302	WT	WT_LR	TAUs	DYN	M	60.4286	0.0483	5.52989	1410	23.5	0.0816414	0.00807634	0.0506841	0.0604578	0.0644288	0.0352348	0.0592045	0.0808051	0.0207438	0.00503954	0.045169	0.0364393	0.0756268		0.0903228	0.140569	0.0266276	0.0888097	0.00656747	0.00401511	0.060006
20220302_WT_DYN	20220302	WT	WT_LR	TAUs	DYN	M	60.4286	0.0483	5.52989	1440	24	0.110659	-0.0183461	0.0492444	0.0903331	0.0475501	0.0200653	0.0375531	0.0829069	0.438387	0.124228	0.077369	0.0354314	0.0918454		0.0808354	0.132778	0.0299213	0.118892	0.0866587	0.0921602	0.0717509
20220302_WT_DYN	20220302	WT	WT_LR	TAUs	DYN	M	60.4286	0.0483	5.52989	1470	24.5	0.149532	0.136721	0.101211	0.0659528	0.0118255	0.0246301	0.0511243	0.0420248	0.0203819	0.0978965	0.08153	0.0708276	0.0828		0.0908042	0.153974	0.081513	0.0452743	0.044155	0.00475687	0.0642898
20220302_WT_DYN	20220302	WT	WT_LR	TAUs	DYN	M	60.4286	0.0483	5.52989	1500	25	0.0910089	0.179522	0.117943	0.0437392	0.072634	0.140373	0.104374	0.112552	0.038774	0.135976	0.0637428	0.075017	0.160644		0.0713554	0.142272	0.0175251	0.0898194	0.0438675	0.0597859	0.0625029
20220302_WT_DYN	20220302	WT	WT_LR	TAUs	DYN	M	60.4286	0.0483	5.52989	1530	25.5	0.0558324	0.0437633	0.126952	0.0603616	0.0626436	0.0607513	0.0991149	0.131994	0.0603524	0.018694	0.0943233	0.103178	0.0224913		0.0812467	0.091096	0.0470647	0.0734509	0.057458	0.0520971	0.0726307
20220302_WT_DYN	20220302	WT	WT_LR	TAUs	DYN	M	60.4286	0.0483	5.52989	1560	26	0.103122	0.0625801	0.104189	0.0444355	0.0684182	0.132277	0.0534782	0.0738948	0.036209	0.0748302	0.0844008	0.122001	0.16609		0.0827311	0.132497	0.0580399	0.188556	0.0316761	0.0025888	0.0590669
20220302_WT_DYN	20220302	WT	WT_LR	TAUs	DYN	M	60.4286	0.0483	5.52989	1590	26.5	0.0885082	0.00393439	0.105019	0.078292	0.0477034	0.0754294	0.0464171	0.062404	0.048914	0.0409223	0.106537	0.0799779	0.0939171		0.0928618	0.119979	0.0939913	0.172522	0.0585183	0.00758867	0.0615997
20220302_WT_DYN	20220302	WT	WT_LR	TAUs	DYN	M	60.4286	0.0483	5.52989	1620	27	0.110236	0.0651603	0.0890303	0.0752828	0.0815605	0.0215143	0.0412775	0.0634575	0.123479	0.137117	0.0530362	0.139189	0.0833311		0.0685611	0.0583792	0.0387089	0.106069	0.049315	0.0299407	0.0619633
20220302_WT_DYN	20220302	WT	WT_LR	TAUs	DYN	M	60.4286	0.0483	5.52989	1650	27.5	0.0329497	0.139934	0.0633819	0.0683818	0.100813	0.0308296	0.0745539	0.073502	0.0993336	0.0225669	0.0750696	0.0332808	0.0828857		0.0733619	0.119009	0.106377	0.0624028	0.0478699	0.0454227	0.0690089
20220302_WT_DYN	20220302	WT	WT_LR	TAUs	DYN	M	60.4286	0.0483	5.52989	1680	28	0.0770798	0.0305213	0.0826703	0.0427135	0.0657282	0.0293194	0.0685901	0.0698429	0.0757209	0.0187058	0.0994719	0.0600809	0.127069		0.093848	0.120527	0.0336816	0.105731	0.0323373	0.0144088	0.0652727
20220302_WT_DYN	20220302	WT	WT_LR	TAUs	DYN	M	60.4286	0.0483	5.52989	1710	28.5	0.0407316	-0.0105146	0.0746798	0.0848084	0.01764	0.0222382	0.0677715	0.101259	-0.00534621	0.0350662	0.0652722	0.0614753	0.0756406		0.0890787	0.0488174	0.115966	0.0909195	0.0470129	0.0112219	0.07105
20220302_WT_DYN	20220302	WT	WT_LR	TAUs	DYN	M	60.4286	0.0483	5.52989	1740	29	0.0694381	0.0574749	0.0397065	0.0409555	0.0495016	0.0151106	0.0581258	0.0347495	0.0439018	0.0542771	0.082532	0.0279863	0.126198		0.08193	0.0863239	0.0466147	0.0607177	0.0509707	0.0600658	0.0593545
20220302_WT_DYN	20220302	WT	WT_LR	TAUs	DYN	M	60.4286	0.0483	5.52989	1770	29.5	0.0773918	-0.00992134	0.0831311	0.0497884	0.0585021	0.122418	0.0622667	0.0901148	0.0225398	0.070418	0.0541295	0.111002	0.0980782		0.0797488	0.0660744	0.0614053	0.198037	0.00434698	0.00386692	0.0578445
20220303_PS19_DYN	20220303	PS19	PS19_F1	TAUb	DYN	F	54.1429	0.026	4.79815	0	0	-0.000777962		0.0704962	0.000853115	-0.0196795	-0.0595012	0.0226376	-0.0223257		-0.0255258	0.0186677	0.0457653	-0.0303601		0.00143615	0.00510312	-0.0188754	-0.0589664	0.00630927	0.0289795	0
20220303_PS19_DYN	20220303	PS19	PS19_F1	TAUb	DYN	F	54.1429	0.026	4.79815	30	0.5	0.0371251		-0.0163125	0.00655123	0.0206289	-0.0204543	0.035804	0.00955469		0.0280245	-0.026467	0.0911829	0.00990531		0.0208056	0.0731552	-0.0488435	0.0367629	-0.0263674	0.0457984	0.00451969
20220303_PS19_DYN	20220303	PS19	PS19_F1	TAUb	DYN	F	54.1429	0.026	4.79815	60	1	0.0536692		0.0780467	-0.000108885	-0.0149862	-0.00668135	0.00792735	0.0154488		0.0155993	0.0272846	0.0806422	0.0543907		0.0154897	0.0471975	0.00215958	-0.0198793	-0.0149504	0.0626956	0.0120851
20220303_PS19_DYN	20220303	PS19	PS19_F1	TAUb	DYN	F	54.1429	0.026	4.79815	90	1.5	0.0131616		0.0581518	0.00941692	0.0188398	-0.0584484	0.0241482	0.00961627		0.035262	0.0192422	0.0551021	-0.0184555		0.0373952	0.0799965	-0.0133856	0.006476	-0.0246117	0.0914133	0.0178956
20220303_PS19_DYN	20220303	PS19	PS19_F1	TAUb	DYN	F	54.1429	0.026	4.79815	120	2	0.137515		0.0188818	0.0240195	0.0492057	-0.0774539	0.0470908	0.022197		-0.0227161	0.0111187	0.0637208	0.0174042		0.039077	0.137388	-0.0299803	-0.0398495	0.0658437	0.0518242	0.0340118
20220303_PS19_DYN	20220303	PS19	PS19_F1	TAUb	DYN	F	54.1429	0.026	4.79815	150	2.5	0.102669		0.144683	0.0240756	0.00938538	0.0429353	0.0302764	0.0224451		0.0714897	0.0196961	0.0941212	0.0533965		0.0449381	0.0501314	0.0338482	0.060174	-0.00165935	0.0674175	0.0339035
20220303_PS19_DYN	20220303	PS19	PS19_F1	TAUb	DYN	F	54.1429	0.026	4.79815	180	3	0.0411357		0.0309535	0.0403163	0.0580495	0.0398639	0.00872065	0.0589135		0.0560489	0.0326039	0.138511	0.00546642		0.0470428	0.0171628	-0.0118372	0.0671643	0.051202	0.0566981	0.0364224
20220303_PS19_DYN	20220303	PS19	PS19_F1	TAUb	DYN	F	54.1429	0.026	4.79815	210	3.5	0.144182		0.064773	0.0246288	0.00132423	0.0186442	-0.024761	0.0342075		0.125547	0.060323	0.137202	0.0164584		0.0403361	0.084608	-0.0188593	0.0115118	0.0108632	0.0883864	0.0271392
20220303_PS19_DYN	20220303	PS19	PS19_F1	TAUb	DYN	F	54.1429	0.026	4.79815	240	4	0.221993		0.031341	0.0567694	0.0154644	0.0182783	0.0234979	0.0167313		0.0139309	0.0575188	0.0667228	0.0471085		0.0654984	0.120681	0.0813967	0.0489795	0.049139	0.0177067	0.0498251
20220303_PS19_DYN	20220303	PS19	PS19_F1	TAUb	DYN	F	54.1429	0.026	4.79815	270	4.5	0.136398		0.0253613	0.0499756	0.0145703	-0.00795065	0.0130623	0.0797682		0.0358536	0.0789842	0.152638	-0.0385011		0.0716987	0.105695	-0.00652765	0.0901088	0.127608	0.099542	0.0610585
20220303_PS19_DYN	20220303	PS19	PS19_F1	TAUb	DYN	F	54.1429	0.026	4.79815	300	5	0.149869		0.0608892	0.0446899	0.0767222	0.187466	0.0595197	0.0672551		0.134956	0.0473742	0.170523	0.091283		0.0635847	0.149555	0.0074465	0.189896	0.0127651	0.1287	0.0607905
20220303_PS19_DYN	20220303	PS19	PS19_F1	TAUb	DYN	F	54.1429	0.026	4.79815	330	5.5	0.164994		0.0479373	0.0730782	0.0455278	0.0678169	0.0541154	0.0787883		0.131525	0.148711	0.136341	0.050771		0.0729798	0.151231	0.0613498	0.117013	0.0737337	0.0666769	0.0785323
20220303_PS19_DYN	20220303	PS19	PS19_F1	TAUb	DYN	F	54.1429	0.026	4.79815	360	6	0.102575		0.141708	0.0776205	0.0784243	0.0438588	0.0126008	0.075401		0.135662	0.063299	0.197568	0.0275215		0.0868731	0.179241	0.0565243	0.142177	0.0741662	0.157861	0.0793491
20220303_PS19_DYN	20220303	PS19	PS19_F1	TAUb	DYN	F	54.1429	0.026	4.79815	390	6.5	0.173587		0.0702181	0.0862245	0.0578752	0.106587	0.0660305	0.0146802		0.090365	0.0803565	0.314441	0.110432		0.0958893	0.111224	0.0655223	0.0184603	0.0476689	0.152181	0.0811063
20220303_PS19_DYN	20220303	PS19	PS19_F1	TAUb	DYN	F	54.1429	0.026	4.79815	420	7	0.106652		0.0762377	0.103646	0.016227	0.0853561	0.0854307	0.0860937		-0.0142345	0.10291	0.207011	0.0717772		0.0992439	0.206433	0.142475	0.0926856	0.0548042	0.174351	0.0964914
20220303_PS19_DYN	20220303	PS19	PS19_F1	TAUb	DYN	F	54.1429	0.026	4.79815	450	7.5	0.155754		0.279391	0.0944138	0.0845653	0.0427264	0.129173	0.0582906		0.135228	0.105044	0.219515	0.147201		0.12455	0.151556	0.0999127	0.124007	0.0910365	0.215398	0.111764
20220303_PS19_DYN	20220303	PS19	PS19_F1	TAUb	DYN	F	54.1429	0.026	4.79815	480	8	0.134949		0.0764967	0.094971	0.0672115	0.0735252	0.103489	0.143604		0.122806	0.114879	0.335647	0.100753		0.114227	0.201489	0.0728034	0.126522	0.073273	0.155104	0.109266
20220303_PS19_DYN	20220303	PS19	PS19_F1	TAUb	DYN	F	54.1429	0.026	4.79815	510	8.5	0.170058		0.100739	0.0795267	0.110622	0.0732862	0.0851019	0.0653005		0.108108	0.0872951	0.235157	0.147118		0.121763	0.232834	0.078835	0.126737	0.0845725	0.155171	0.109948
20220303_PS19_DYN	20220303	PS19	PS19_F1	TAUb	DYN	F	54.1429	0.026	4.79815	540	9	0.320254		0.21167	0.0917901	0.132308	-0.00995435	0.160338	0.131889		0.118011	0.0997591	0.215152	0.0784436		0.129497	0.274395	0.0231514	0.149456	0.0610933	0.110133	0.120204
20220303_PS19_DYN	20220303	PS19	PS19_F1	TAUb	DYN	F	54.1429	0.026	4.79815	570	9.5	0.155222		0.181028	0.113946	0.106158	0.0109508	0.100754	0.148968		0.0352746	0.0973591	0.165089	0.0400172		0.129556	0.236562	0.0652706	0.0821231	0.0840042	0.187621	0.115111
20220303_PS19_DYN	20220303	PS19	PS19_F1	TAUb	DYN	F	54.1429	0.026	4.79815	600	10	0.236099		0.0963178	0.132957	0.127542	0.0447795	0.114458	0.111572		0.352206	0.12787	0.257207	0.0880033		0.148571	0.207462	0.168857	0.15672	0.156535	0.206731	0.137428
20220303_PS19_DYN	20220303	PS19	PS19_F1	TAUb	DYN	F	54.1429	0.026	4.79815	630	10.5	0.261654		0.205463	0.127142	0.141928	0.071429	0.06515	0.0821648		0.195369	0.0754152	0.28222	0.0952522		0.153375	0.256879	0.111087	0.121722	0.086663	0.237643	0.129741
20220303_PS19_DYN	20220303	PS19	PS19_F1	TAUb	DYN	F	54.1429	0.026	4.79815	660	11	0.19946		0.146008	0.116174	0.116568	-0.0310845	0.121299	0.131647		0.091147	0.166	0.246034	0.00612477		0.143273	0.200528	0.0261601	0.120446	0.124941	0.200191	0.128617
20220303_PS19_DYN	20220303	PS19	PS19_F1	TAUb	DYN	F	54.1429	0.026	4.79815	690	11.5	0.233813		0.181627	0.154362	0.161579	0.0425599	0.144321	0.183667		0.0859797	0.13094	0.201106	0.144674		0.163921	0.207389	0.055641	0.157035	0.158807	0.190703	0.14944
20220303_PS19_DYN	20220303	PS19	PS19_F1	TAUb	DYN	F	54.1429	0.026	4.79815	720	12	0.260052		0.22226	0.136638	0.12856	0.0463333	0.17507	0.110763		0.0274333	0.158732	0.170052	0.219302		0.160607	0.265451	0.0903897	0.162021	0.156125	0.218537	0.151825
20220303_PS19_DYN	20220303	PS19	PS19_F1	TAUb	DYN	F	54.1429	0.026	4.79815	750	12.5	0.19715		0.211763	0.148469	0.157528	0.169193	0.164733	0.181264		0.187712	0.113073	0.256763	0.176685		0.197912	0.32576	0.0653457	0.235176	0.0908658	0.200536	0.172088
20220303_PS19_DYN	20220303	PS19	PS19_F1	TAUb	DYN	F	54.1429	0.026	4.79815	780	13	0.203054		0.199473	0.155826	0.127035	0.134621	0.142865	0.130131		0.111153	0.211212	0.264902	0.153784		0.191273	0.252243	0.0984754	0.208714	0.115363	0.26799	0.163159
20220303_PS19_DYN	20220303	PS19	PS19_F1	TAUb	DYN	F	54.1429	0.026	4.79815	810	13.5	0.275691		0.20025	0.136899	0.119552	0.0928036	0.193157	0.144111		0.220167	0.117176	0.373305	0.216809		0.182096	0.343571	0.111442	0.142146	0.163396	0.160352	0.171048
20220303_PS19_DYN	20220303	PS19	PS19_F1	TAUb	DYN	F	54.1429	0.026	4.79815	840	14	0.240573		0.271804	0.164031	0.100114	0.0587602	0.247194	0.199895		0.0723811	0.148171	0.411234	0.321646		0.179863	0.236934	0.0746819	0.222155	0.113057	0.3346	0.171568
20220303_PS19_DYN	20220303	PS19	PS19_F1	TAUb	DYN	F	54.1429	0.026	4.79815	870	14.5	0.35401		0.115971	0.194147	0.115396	0.194051	0.157044	0.129618		0.186181	0.171905	0.295601	0.249852		0.194499	0.290518	0.139883	0.118223	0.119208	0.176136	0.173477
20220303_PS19_DYN	20220303	PS19	PS19_F1	TAUb	DYN	F	54.1429	0.026	4.79815	900	15	0.263192		0.282457	0.20836	0.123556	0.148388	0.173429	0.138562		0.151099	0.187398	0.240316	0.184871		0.187381	0.375307	0.138226	0.149703	0.140756	0.205619	0.180217
20220303_PS19_DYN	20220303	PS19	PS19_F1	TAUb	DYN	F	54.1429	0.026	4.79815	930	15.5	0.178714		0.205907	0.142411	0.0755108	0.297369	0.182666	0.197568		-0.0179701	0.19271	0.270124	0.264651		0.170299	0.176583	0.109026	0.141317	0.0840265	0.302585	0.151086
20220303_PS19_DYN	20220303	PS19	PS19_F1	TAUb	DYN	F	54.1429	0.026	4.79815	960	16	0.321882		0.201969	0.139547	0.161285	0.0315815	0.130032	0.129755		0.260991	0.182783	0.199377	0.220179		0.193829	0.232194	0.0622375	0.177636	0.235974	0.130224	0.170892
20220303_PS19_DYN	20220303	PS19	PS19_F1	TAUb	DYN	F	54.1429	0.026	4.79815	990	16.5	0.253936		0.234508	0.179603	0.0976972	0.150969	0.208232	0.1551		0.0966879	0.207829	0.335472	0.238518		0.181657	0.253955	0.142276	0.19797	0.153869	0.205976	0.185141
20220303_PS19_DYN	20220303	PS19	PS19_F1	TAUb	DYN	F	54.1429	0.026	4.79815	1020	17	0.279354		0.11626	0.184219	0.163211	0.0667357	0.205256	0.124499		0.201268	0.156531	0.263118	0.215972		0.188921	0.325975	0.10966	0.131337	0.189206	0.231136	0.185798
20220303_PS19_DYN	20220303	PS19	PS19_F1	TAUb	DYN	F	54.1429	0.026	4.79815	1050	17.5	0.296403		0.203552	0.176746	0.104695	0.366293	0.181929	0.194173		0.212412	0.139167	0.357095	0.338501		0.203748	0.354815	0.0980207	0.252902	0.164001	0.254333	0.190044
20220303_PS19_DYN	20220303	PS19	PS19_F1	TAUb	DYN	F	54.1429	0.026	4.79815	1080	18	0.284136		0.173889	0.209906	0.152849	0.207692	0.197481	0.180242		0.147772	0.163886	0.284572	0.270252		0.224222	0.3426	0.173336	0.221431	0.130477	0.202844	0.203749
20220303_PS19_DYN	20220303	PS19	PS19_F1	TAUb	DYN	F	54.1429	0.026	4.79815	1110	18.5	0.350818		0.248038	0.186463	0.147748	0.145946	0.226244	0.149921		0.191865	0.1319	0.347001	0.240821		0.170222	0.337042	0.153563	0.199728	0.205407	0.182787	0.189665
20220303_PS19_DYN	20220303	PS19	PS19_F1	TAUb	DYN	F	54.1429	0.026	4.79815	1140	19	0.245302		0.227969	0.157296	0.203558	0.210056	0.122946	0.112677		0.134987	0.207033	0.29793	0.244861		0.198154	0.291018	0.138338	0.227454	0.201942	0.222144	0.193794
20220303_PS19_DYN	20220303	PS19	PS19_F1	TAUb	DYN	F	54.1429	0.026	4.79815	1170	19.5	0.259659		0.158259	0.13789	0.192808	0.26165	0.214228	0.257422		0.331177	0.168687	0.244613	0.18062		0.203822	0.27518	0.163512	0.279917	0.225347	0.18402	0.197348
20220303_PS19_DYN	20220303	PS19	PS19_F1	TAUb	DYN	F	54.1429	0.026	4.79815	1200	20	0.278616		0.158334	0.148392	0.141379	0.0572573	0.18517	0.192413		0.315205	0.21674	0.277907	0.241312		0.217438	0.33506	0.0799889	0.106965	0.0919623	0.19715	0.174941
20220303_PS19_DYN	20220303	PS19	PS19_F1	TAUb	DYN	F	54.1429	0.026	4.79815	1230	20.5	0.33678		0.206282	0.202227	0.144424	0.00939023	0.246127	0.192695		0.234143	0.187777	0.286809	0.11103		0.204357	0.298865	0.18836	0.20925	0.175422	0.198318	0.189259
20220303_PS19_DYN	20220303	PS19	PS19_F1	TAUb	DYN	F	54.1429	0.026	4.79815	1260	21	0.285184		0.224568	0.123693	0.126138	0.432655	0.275895	0.164577		0.0585895	0.161845	0.204775	0.343108		0.190031	0.21375	0.169852	0.196036	0.12745	0.191372	0.171263
20220303_PS19_DYN	20220303	PS19	PS19_F1	TAUb	DYN	F	54.1429	0.026	4.79815	1290	21.5	0.287317		0.257432	0.172987	0.145979	0.234599	0.187044	0.143878		0.0319644	0.17614	0.140235	0.179626		0.190129	0.264063	0.15725	0.199133	0.114583	0.15196	0.171188
20220303_PS19_DYN	20220303	PS19	PS19_F1	TAUb	DYN	F	54.1429	0.026	4.79815	1320	22	0.306121		0.224114	0.196204	0.195153	0.226849	0.213413	0.160466		0.0534158	0.145288	0.224696	0.218721		0.21662	0.370017	0.181673	0.254989	0.170217	0.207917	0.204308
20220303_PS19_DYN	20220303	PS19	PS19_F1	TAUb	DYN	F	54.1429	0.026	4.79815	1350	22.5	0.171605		0.253545	0.154154	0.133805	0.0962553	0.165	0.118246		0.0996427	0.198544	0.181224	0.172352		0.169488	0.318394	0.0905482	0.258515	0.240622	0.158733	0.17534
20220303_PS19_DYN	20220303	PS19	PS19_F1	TAUb	DYN	F	54.1429	0.026	4.79815	1380	23	0.258204		0.173597	0.206993	0.140419	0.10304	0.203893	0.200126		0.313745	0.134076	0.30169	0.290357		0.203238	0.291997	0.0656263	0.197093	0.151928	0.178868	0.180881
20220303_PS19_DYN	20220303	PS19	PS19_F1	TAUb	DYN	F	54.1429	0.026	4.79815	1410	23.5	0.179156		0.221611	0.131028	0.259966	0.149772	0.192485	0.180222		0.262148	0.187473	0.287297	0.171889		0.180311	0.319957	0.125142	0.106331	0.172942	0.258212	0.180111
20220303_PS19_DYN	20220303	PS19	PS19_F1	TAUb	DYN	F	54.1429	0.026	4.79815	1440	24	0.361878		0.106569	0.201148	0.187781	0.269334	0.157445	0.13856		0.217983	0.147341	0.215452	0.15387		0.182149	0.345496	0.192293	0.231165	0.124603	0.072284	0.179762
20220303_PS19_DYN	20220303	PS19	PS19_F1	TAUb	DYN	F	54.1429	0.026	4.79815	1470	24.5	0.269248		0.151484	0.142825	0.0840185	0.0716939	0.14579	0.181625		0.111094	0.126435	0.155405	0.277273		0.157795	0.273028	0.0599548	0.261448	0.138498	0.108803	0.143488
20220303_PS19_DYN	20220303	PS19	PS19_F1	TAUb	DYN	F	54.1429	0.026	4.79815	1500	25	0.320854		0.23503	0.226288	0.169625	0.10281	0.220101	0.206682		0.217862	0.12152	0.324386	0.208827		0.201939	0.317773	0.163085	0.16409	0.155703	0.25509	0.196365
20220303_PS19_DYN	20220303	PS19	PS19_F1	TAUb	DYN	F	54.1429	0.026	4.79815	1530	25.5	0.18878		0.185037	0.176022	0.201318	0.208435	0.198316	0.162771		0.20651	0.148667	0.160232	0.201289		0.18833	0.296905	0.12186	0.244969	0.0991751	0.0898665	0.173254
20220303_PS19_DYN	20220303	PS19	PS19_F1	TAUb	DYN	F	54.1429	0.026	4.79815	1560	26	0.213021		0.26878	0.174488	0.146621	0.0640607	0.103075	0.185988		0.214887	0.176932	0.310491	0.145095		0.195058	0.317602	0.11743	0.241342	0.116396	0.309162	0.168675
20220303_PS19_DYN	20220303	PS19	PS19_F1	TAUb	DYN	F	54.1429	0.026	4.79815	1590	26.5	0.235165		0.287893	0.168326	0.144981	0.1196	0.240262	0.188135		0.247279	0.144918	0.220656	0.256917		0.194332	0.303467	0.182314	0.1763	0.105679	0.15611	0.182679
20220303_PS19_DYN	20220303	PS19	PS19_F1	TAUb	DYN	F	54.1429	0.026	4.79815	1620	27	0.181022		0.162054	0.140199	0.175281	0.106484	0.100922	0.11753		0.314098	0.163327	0.273722	0.144657		0.187282	0.35188	0.107355	0.135921	0.177133	0.17578	0.160019
20220303_PS19_DYN	20220303	PS19	PS19_F1	TAUb	DYN	F	54.1429	0.026	4.79815	1650	27.5	0.212329		0.247679	0.125101	0.169376	-0.0290045	0.15434	0.15421		0.123409	0.117008	0.202536	0.185269		0.171384	0.335504	0.0673663	0.152347	0.130826	0.198678	0.152428
20220303_PS19_DYN	20220303	PS19	PS19_F1	TAUb	DYN	F	54.1429	0.026	4.79815	1680	28	0.2528		0.220469	0.167003	0.224524	0.183844	0.237996	0.146182		0.228535	0.136841	0.17177	0.16777		0.188659	0.310524	0.100967	0.196007	0.140335	0.125738	0.180972
20220303_PS19_DYN	20220303	PS19	PS19_F1	TAUb	DYN	F	54.1429	0.026	4.79815	1710	28.5	0.13022		0.156074	0.147477	0.134331	0.189405	0.171631	0.205624		0.0395872	0.176476	0.251756	0.225647		0.176278	0.23456	0.137114	0.236069	0.185124	0.221469	0.163315
20220303_PS19_DYN	20220303	PS19	PS19_F1	TAUb	DYN	F	54.1429	0.026	4.79815	1740	29	0.240624		0.306817	0.121544	0.124351	0.129859	0.1989	0.0796187		0.237349	0.0968162	0.215921	0.262701		0.149343	0.262426	0.124324	0.112567	0.161108	0.21761	0.143587
20220303_PS19_DYN	20220303	PS19	PS19_F1	TAUb	DYN	F	54.1429	0.026	4.79815	1770	29.5	0.149045		0.242747	0.155805	0.173677	0.135915	0.131075	0.145988		0.197852	0.135445	0.146922	0.142475		0.151346	0.247426	0.17642	0.244479	0.132691	0.21417	0.162619
20220303_WT_DYN	20220303	WT	WT_R1	TAUb	DYN	F	71.2857	0.0268	4.54366	0	0	-0.0220414		-0.00161583	-0.00412558	-0.0145224	-0.0255339	0.0239243	0.00028831	0.000579362	-0.0226727	0.00674996	0.0134501	-0.0205882		0.0121514	0.0186498	-0.00537218	-0.00884612	-0.0130516	-0.0206265	0
20220303_WT_DYN	20220303	WT	WT_R1	TAUb	DYN	F	71.2857	0.0268	4.54366	30	0.5	0.000588287		0.00352059	0.00227103	0.00360408	0.00940864	0.019392	0.0160544	-0.0153858	0.00963099	-0.00591694	0.0295869	0.0245451		0.0126457	0.0300646	0.0238669	0.0295932	-0.00043694	0.0120171	0.0105141
20220303_WT_DYN	20220303	WT	WT_R1	TAUb	DYN	F	71.2857	0.0268	4.54366	60	1	-0.00141281		0.0297725	0.00123974	-0.0087007	0.0899601	0.0168059	-0.00529584	-0.0247729	-0.0255621	-0.0135278	-0.00778356	0.0467007		0.00783224	0.014412	-0.0167649	0.0626159	0.0235043	0.010482	0.00494771
20220303_WT_DYN	20220303	WT	WT_R1	TAUb	DYN	F	71.2857	0.0268	4.54366	90	1.5	0.00412202		0.0330353	-0.00363564	0.0407212	-0.0228155	0.00727361	0.00913398	0.00292745	0.00148313	0.0140329	0.00185319	-0.00474416		0.0255763	0.0584675	-0.000932571	-0.00825832	0.00848502	-0.000485679	0.012309
20220303_WT_DYN	20220303	WT	WT_R1	TAUb	DYN	F	71.2857	0.0268	4.54366	120	2	0.00107526		0.0321313	0.0371959	0.0301331	0.0165793	0.0309462	-0.00370232	-0.0276136	-0.01008	0.00815567	0.01173	0.0795513		0.0298561	0.0330364	-0.00212046	-0.00884817	0.00244453	-0.00806477	0.0214305
20220303_WT_DYN	20220303	WT	WT_R1	TAUb	DYN	F	71.2857	0.0268	4.54366	150	2.5	0.017279		0.0376451	0.0193738	0.00771045	0.065642	0.00227605	0.0217988	-0.00417899	-0.0232196	0.0127389	-0.0152096	0.0435426		0.0318478	0.0531191	-0.00685659	0.0426835	0.00299294	0.00423805	0.0169761
20220303_WT_DYN	20220303	WT	WT_R1	TAUb	DYN	F	71.2857	0.0268	4.54366	180	3	0.0297528		0.0362343	0.0118622	0.037039	-0.0246306	0.0304044	0.00306854	-0.01314	0.0112123	0.0322647	-0.00335455	-0.0148391		0.0395348	0.0420072	-0.00815578	0.0225388	0.011	0.00840117	0.0224115
20220303_WT_DYN	20220303	WT	WT_R1	TAUb	DYN	F	71.2857	0.0268	4.54366	210	3.5	0.048939		0.0266207	0.040626	0.0286633	0.00639996	0.0409201	0.0112137	-0.0272504	0.0716525	0.024559	0.0642278	0.0398992		0.0466544	0.0625328	0.00651172	0.00386622	0.0322866	0.0456983	0.0372206
20220303_WT_DYN	20220303	WT	WT_R1	TAUb	DYN	F	71.2857	0.0268	4.54366	240	4	0.0424189		0.0679931	0.0236233	0.037534	0.0343701	0.0584178	0.00163434	-0.0156195	-0.000408116	0.0174336	0.0947089	0.0129835		0.0356082	0.0554365	0.0397468	0.0418607	0.0369481	0.00824558	0.0354759
20220303_WT_DYN	20220303	WT	WT_R1	TAUb	DYN	F	71.2857	0.0268	4.54366	270	4.5	0.0094413		0.0865703	0.0517296	0.0578898	0.0285513	0.031712	0.0348246	0.0911329	0.0478483	0.0374661	0.0409464	0.0104823		0.0351285	0.0100708	0.00196568	0.0334034	0.0354881	0.0720963	0.033881
20220303_WT_DYN	20220303	WT	WT_R1	TAUb	DYN	F	71.2857	0.0268	4.54366	300	5	0.0546852		0.103339	0.0619352	0.0662103	0.215803	0.0439325	0.0190198	0.093719	0.0406591	0.0217141	0.0497467	0.0518387		0.0509792	0.0897944	0.0744382	0.0402138	0.0242184	0.0682113	0.0535229
20220303_WT_DYN	20220303	WT	WT_R1	TAUb	DYN	F	71.2857	0.0268	4.54366	330	5.5	0.0556775		0.0299956	0.0428987	0.0642626	0.0282487	0.0424374	0.0133593	-0.0232231	0.109714	-0.00594866	0.0435498	0.0300172		0.0567193	0.137028	0.0115303	0.0122195	0.029187	0.00801356	0.0366616
20220303_WT_DYN	20220303	WT	WT_R1	TAUb	DYN	F	71.2857	0.0268	4.54366	360	6	0.0472461		0.0586813	0.0592314	0.059152	0.24092	0.010094	0.0562573	0.0776144	0.0227959	0.042837	0.0792145	-0.0180797		0.071142	0.0708542	0.15602	0.0373818	0.0459588	0.0809444	0.0573882
20220303_WT_DYN	20220303	WT	WT_R1	TAUb	DYN	F	71.2857	0.0268	4.54366	390	6.5	0.121166		0.0884222	0.0480731	0.0810294	0.0631666	0.0927341	0.0892228	0.0576276	0.0535255	0.0647216	0.0516565	0.0379331		0.0696469	0.102784	0.0144025	0.0892162	0.00548278	0.00424855	0.0631788
20220303_WT_DYN	20220303	WT	WT_R1	TAUb	DYN	F	71.2857	0.0268	4.54366	420	7	0.0622591		0.128726	0.0589573	0.0835681	0.0548853	0.0505375	0.0323733	0.00139719	0.037905	0.048772	0.0986538	-0.0164013		0.066276	0.116631	0.0582394	0.0338403	0.0522653	0.030222	0.0662231
20220303_WT_DYN	20220303	WT	WT_R1	TAUb	DYN	F	71.2857	0.0268	4.54366	450	7.5	0.0657581		0.133611	0.0578026	0.0981609	0.00156278	0.0605129	0.0511939	0.0376861	0.00612828	0.0507101	0.0706578	0.0679463		0.0830341	0.102372	-0.0144525	0.0698997	0.0183396	0.0935171	0.0642101
20220303_WT_DYN	20220303	WT	WT_R1	TAUb	DYN	F	71.2857	0.0268	4.54366	480	8	0.105408		0.059642	0.075222	0.0354593	0.0371629	0.0823959	0.0444776	-0.00474475	-0.0205936	0.0489542	0.101514	0.0490142		0.0808042	0.107344	0.094836	0.0391836	0.0821213	0.0379757	0.0690563
20220303_WT_DYN	20220303	WT	WT_R1	TAUb	DYN	F	71.2857	0.0268	4.54366	510	8.5	0.0781327		0.0717583	0.0524806	0.105963	0.0980397	0.0644441	0.0984262	0.0929883	0.104749	0.107984	0.140466	0.182609		0.0817495	0.168431	0.0370223	0.118387	0.0622189	0.0946881	0.0855524
20220303_WT_DYN	20220303	WT	WT_R1	TAUb	DYN	F	71.2857	0.0268	4.54366	540	9	0.10249		0.0470926	0.0662888	0.0607938	0.0803887	0.0731546	0.0797305	0.0248813	0.0229	0.0503968	0.0996962	0.17418		0.0987709	0.149733	0.0334553	0.105602	0.0587177	0.119589	0.0707963
20220303_WT_DYN	20220303	WT	WT_R1	TAUb	DYN	F	71.2857	0.0268	4.54366	570	9.5	0.120375		0.111656	0.0825207	0.134436	0.0837263	0.0965607	0.11415	0.208256	0.058	0.125318	0.0686715	0.147525		0.117161	0.123857	0.0235562	0.16755	0.0681142	0.105888	0.0987766
20220303_WT_DYN	20220303	WT	WT_R1	TAUb	DYN	F	71.2857	0.0268	4.54366	600	10	0.0824197		0.169164	0.0908047	0.121859	0.0103179	0.0686614	0.105767	0.0971296	0.14	0.141526	0.160408	0.0956543		0.133007	0.188807	0.0652899	0.144005	0.0500337	0.0481441	0.106752
20220303_WT_DYN	20220303	WT	WT_R1	TAUb	DYN	F	71.2857	0.0268	4.54366	630	10.5	0.222114		0.117641	0.0794954	0.124809	0.0850457	0.0791347	0.129932	0.0336037	0.0927413	0.0758094	0.0818546	0.138697		0.149148	0.212287	0.101564	0.100756	0.0640384	0.0693116	0.106818
20220303_WT_DYN	20220303	WT	WT_R1	TAUb	DYN	F	71.2857	0.0268	4.54366	660	11	0.128829		0.180648	0.129931	0.137306	0.112097	0.0822329	0.125256	0.123038	0.391943	0.135905	0.188766	0.0881287		0.138465	0.131831	0.0635884	0.190767	0.0787126	0.064624	0.121735
20220303_WT_DYN	20220303	WT	WT_R1	TAUb	DYN	F	71.2857	0.0268	4.54366	690	11.5	0.0902802		0.102603	0.14273	0.114215	0.0458609	0.0783166	0.0986107	0.21892	0.0114343	0.0862172	0.0978728	0.147158		0.133351	0.242431	0.0919485	0.078726	0.115553	0.07597	0.121681
20220303_WT_DYN	20220303	WT	WT_R1	TAUb	DYN	F	71.2857	0.0268	4.54366	720	12	0.114167		0.222873	0.0986161	0.110665	0.0765278	0.149523	0.146146	0.0394681	0.01777	0.0779675	0.153505	0.155923		0.1489	0.203494	0.0966696	0.136433	0.076386	0.0915162	0.117452
20220303_WT_DYN	20220303	WT	WT_R1	TAUb	DYN	F	71.2857	0.0268	4.54366	750	12.5	0.120741		0.133777	0.15825	0.133724	0.0716986	0.150997	0.161716	0.0272447	0.0224079	0.0779898	0.202941	0.124627		0.163596	0.206978	0.0852908	0.0974631	0.0776257	0.100186	0.136338
20220303_WT_DYN	20220303	WT	WT_R1	TAUb	DYN	F	71.2857	0.0268	4.54366	780	13	0.127566		0.169982	0.141144	0.187757	0.0867275	0.12231	0.110274	0.0682604	0.0762147	0.129462	0.240372	0.181225		0.156299	0.168356	0.134528	0.232861	0.0942162	0.0698311	0.136576
20220303_WT_DYN	20220303	WT	WT_R1	TAUb	DYN	F	71.2857	0.0268	4.54366	810	13.5	0.206461		0.248077	0.154756	0.12953	0.210501	0.154427	0.194992	-0.00118947	0.112551	0.147704	0.214009	0.161766		0.161217	0.239267	0.125475	0.262859	0.095639	0.143366	0.149839
20220303_WT_DYN	20220303	WT	WT_R1	TAUb	DYN	F	71.2857	0.0268	4.54366	840	14	0.128036		0.281222	0.157703	0.130051	0.116064	0.154585	0.0862846	0.0812406	0.110445	0.15355	0.146409	0.234159		0.20236	0.211672	0.18573	0.105302	0.122421	0.193422	0.150876
20220303_WT_DYN	20220303	WT	WT_R1	TAUb	DYN	F	71.2857	0.0268	4.54366	870	14.5	0.198735		0.171685	0.169202	0.20227	0.0376926	0.180131	0.176806	0.227723	0.0490162	0.183555	0.157431	0.125457		0.201506	0.210974	0.140773	0.153629	0.196475	0.164301	0.187166
20220303_WT_DYN	20220303	WT	WT_R1	TAUb	DYN	F	71.2857	0.0268	4.54366	900	15	0.209921		0.261838	0.18709	0.24569	0.101694	0.144779	0.156374	0.0823424	0.185077	0.101593	0.162668	0.150598		0.209695	0.277214	0.189051	0.0840018	0.172038	0.196168	0.189564
20220303_WT_DYN	20220303	WT	WT_R1	TAUb	DYN	F	71.2857	0.0268	4.54366	930	15.5	0.229525		0.209046	0.239219	0.202583	0.168208	0.138592	0.137521	0.119429	0.105394	0.138723	0.186725	0.157121		0.228531	0.208932	0.208529	0.146071	0.202758	0.239487	0.191173
20220303_WT_DYN	20220303	WT	WT_R1	TAUb	DYN	F	71.2857	0.0268	4.54366	960	16	0.224996		0.213736	0.163044	0.179999	0.213093	0.272034	0.248532	0.0911601	0.0930054	0.160575	0.125911	0.319915		0.244059	0.290566	0.157236	0.207074	0.0972983	0.132197	0.182606
20220303_WT_DYN	20220303	WT	WT_R1	TAUb	DYN	F	71.2857	0.0268	4.54366	990	16.5	0.218871		0.183461	0.187943	0.11629	0.134884	0.225154	0.246288	0.0870759	0.0514326	0.159739	0.140771	0.152694		0.256687	0.301383	0.116079	0.164287	0.187675	0.15923	0.194896
20220303_WT_DYN	20220303	WT	WT_R1	TAUb	DYN	F	71.2857	0.0268	4.54366	1020	17	0.312484		0.223197	0.243617	0.278253	0.146778	0.272101	0.249458	0.110335	0.144315	0.139033	0.176147	0.314574		0.282431	0.328562	0.132984	0.259676	0.163088	0.253037	0.221812
20220303_WT_DYN	20220303	WT	WT_R1	TAUb	DYN	F	71.2857	0.0268	4.54366	1050	17.5	0.174133		0.294409	0.230077	0.220229	0.200225	0.235976	0.302534	0.0901144	0.212861	0.173664	0.181941	0.165344		0.268276	0.384177	0.243924	0.294035	0.189062	0.171516	0.224169
20220303_WT_DYN	20220303	WT	WT_R1	TAUb	DYN	F	71.2857	0.0268	4.54366	1080	18	0.168116		0.337387	0.254936	0.207304	0.165033	0.214563	0.25495	0.334257	0.292548	0.202892	0.291301	0.152009		0.274536	0.432086	0.252832	0.102838	0.191851	0.293188	0.248139
20220303_WT_DYN	20220303	WT	WT_R1	TAUb	DYN	F	71.2857	0.0268	4.54366	1110	18.5	0.350537		0.345898	0.284838	0.256655	0.220955	0.25038	0.153514	0.0751324	0.0782031	0.213668	0.191187	0.165643		0.291757	0.400906	0.254411	0.236444	0.228609	0.139601	0.260457
20220303_WT_DYN	20220303	WT	WT_R1	TAUb	DYN	F	71.2857	0.0268	4.54366	1140	19	0.171872		0.299256	0.240571	0.402336	0.215174	0.297401	0.282593	0.149825	0.234838	0.257455	0.237877	0.499032		0.304445	0.382907	0.249361	0.214149	0.292752	0.230629	0.28611
20220303_WT_DYN	20220303	WT	WT_R1	TAUb	DYN	F	71.2857	0.0268	4.54366	1170	19.5	0.275447		0.373643	0.263787	0.293524	0.195379	0.2586	0.242777	0.107676	0.296942	0.240408	0.341842	0.333653		0.297576	0.422402	0.237723	0.145423	0.259009	0.261735	0.270408
20220303_WT_DYN	20220303	WT	WT_R1	TAUb	DYN	F	71.2857	0.0268	4.54366	1200	20	0.239499		0.221936	0.286595	0.335795	0.246166	0.293109	0.246833	0.113035	0.248207	0.296941	0.152972	0.32602		0.337896	0.466914	0.204608	0.244851	0.207667	0.272321	0.292578
20220303_WT_DYN	20220303	WT	WT_R1	TAUb	DYN	F	71.2857	0.0268	4.54366	1230	20.5	0.3774		0.352702	0.281818	0.252852	0.168256	0.252342	0.292172	0.729135	0.154359	0.235289	0.29088	0.19548		0.288375	0.503527	0.301336	0.156334	0.331834	0.246046	0.282448
20220303_WT_DYN	20220303	WT	WT_R1	TAUb	DYN	F	71.2857	0.0268	4.54366	1260	21	0.257194		0.396873	0.329434	0.330507	0.234045	0.363925	0.312544	0.263147	0.398708	0.196572	0.296712	0.41759		0.359332	0.357017	0.372027	0.232782	0.169915	0.150045	0.292305
20220303_WT_DYN	20220303	WT	WT_R1	TAUb	DYN	F	71.2857	0.0268	4.54366	1290	21.5	0.213694		0.334318	0.260327	0.300148	0.253258	0.344139	0.354984	0.059672	0.293195	0.249771	0.230327	0.532329		0.38396	0.493212	0.267671	0.402315	0.219919	0.324697	0.297578
20220303_WT_DYN	20220303	WT	WT_R1	TAUb	DYN	F	71.2857	0.0268	4.54366	1320	22	0.362577		0.336373	0.307029	0.322091	0.485648	0.294388	0.35657	0.597266	0.220375	0.331686	0.238248	0.330973		0.350424	0.40183	0.346642	0.384515	0.282576	0.389594	0.329022
20220303_WT_DYN	20220303	WT	WT_R1	TAUb	DYN	F	71.2857	0.0268	4.54366	1350	22.5	0.306493		0.521734	0.272188	0.394752	0.344909	0.244206	0.40478	0.360509	0.206117	0.309346	0.356326	0.364898		0.380796	0.572646	0.343725	0.426883	0.240158	0.209985	0.338816
20220303_WT_DYN	20220303	WT	WT_R1	TAUb	DYN	F	71.2857	0.0268	4.54366	1380	23	0.346694		0.539821	0.29775	0.297861	0.489239	0.295929	0.198619	0.179541	0.0955911	0.234687	0.372549	0.62089		0.335166	0.480966	0.290336	0.344544	0.323865	0.35743	0.323921
20220303_WT_DYN	20220303	WT	WT_R1	TAUb	DYN	F	71.2857	0.0268	4.54366	1410	23.5	0.463176		0.296542	0.269377	0.482619	0.214058	0.338934	0.341858	0.325265	0.588067	0.306728	0.422518	0.409048		0.382304	0.481958	0.270605	0.265028	0.319064	0.251255	0.354366
20220303_WT_DYN	20220303	WT	WT_R1	TAUb	DYN	F	71.2857	0.0268	4.54366	1440	24	0.319919		0.301038	0.255402	0.348321	0.340573	0.338517	0.327874	0.162603	0.247058	0.335166	0.320152	0.527362		0.380477	0.487354	0.40566	0.319684	0.276897	0.387619	0.324852
20220303_WT_DYN	20220303	WT	WT_R1	TAUb	DYN	F	71.2857	0.0268	4.54366	1470	24.5	0.416866		0.383902	0.272655	0.382341	0.481409	0.29048	0.355142	0.0786815	0.476012	0.228734	0.331208	0.375722		0.4167	0.624413	0.214637	0.454124	0.223262	0.364935	0.338275
20220303_WT_DYN	20220303	WT	WT_R1	TAUb	DYN	F	71.2857	0.0268	4.54366	1500	25	0.379865		0.341674	0.378354	0.29619	0.314781	0.379894	0.300756	0.196557	0.439912	0.302961	0.20667	0.68952		0.383069	0.407748	0.29867	0.371103	0.222687	0.284748	0.324985
20220303_WT_DYN	20220303	WT	WT_R1	TAUb	DYN	F	71.2857	0.0268	4.54366	1530	25.5	0.25735		0.347555	0.392475	0.306711	0.360593	0.36825	0.381423	0.392569	0.240232	0.2549	0.244663	0.468474		0.384118	0.531712	0.301647	0.38582	0.232715	0.296983	0.328848
20220303_WT_DYN	20220303	WT	WT_R1	TAUb	DYN	F	71.2857	0.0268	4.54366	1560	26	0.219975		0.318286	0.363542	0.262574	0.278553	0.382338	0.325552	0.166298	0.103734	0.244766	0.292299	0.409335		0.369321	0.562169	0.372517	0.417788	0.194968	0.266585	0.332884
20220303_WT_DYN	20220303	WT	WT_R1	TAUb	DYN	F	71.2857	0.0268	4.54366	1590	26.5	0.290537		0.299476	0.302824	0.352358	0.256251	0.266891	0.362377	0.283134	0.203489	0.330835	0.266201	0.293766		0.426581	0.494603	0.354551	0.285234	0.251583	0.271319	0.325016
20220303_WT_DYN	20220303	WT	WT_R1	TAUb	DYN	F	71.2857	0.0268	4.54366	1620	27	0.363442		0.358919	0.261892	0.335279	0.329195	0.358076	0.277449	0.16337	0.132777	0.25355	0.52296	0.424846		0.399045	0.597004	0.405295	0.277789	0.272761	0.182668	0.334888
20220303_WT_DYN	20220303	WT	WT_R1	TAUb	DYN	F	71.2857	0.0268	4.54366	1650	27.5	0.381359		0.306698	0.305274	0.36357	0.192741	0.371345	0.321214	0.57216	0.0900115	0.26393	0.452053	0.440848		0.350242	0.472019	0.191239	0.235681	0.226723	0.263436	0.310295
20220303_WT_DYN	20220303	WT	WT_R1	TAUb	DYN	F	71.2857	0.0268	4.54366	1680	28	0.428354		0.306026	0.281491	0.36579	0.363886	0.359922	0.338314	0.102391	0.380926	0.252158	0.214297	0.325576		0.44084	0.485985	0.230739	0.385059	0.243019	0.333287	0.32685
20220303_WT_DYN	20220303	WT	WT_R1	TAUb	DYN	F	71.2857	0.0268	4.54366	1710	28.5	0.286847		0.377252	0.297956	0.307206	0.268235	0.468751	0.301726	0.221438	0.1627	0.311998	0.290553	0.674899		0.365962	0.556147	0.358916	0.276609	0.31342	0.36701	0.337449
20220303_WT_DYN	20220303	WT	WT_R1	TAUb	DYN	F	71.2857	0.0268	4.54366	1740	29	0.382797		0.402249	0.339493	0.318776	0.170316	0.305587	0.416316	0.18736	0.223555	0.314706	0.377388	0.510207		0.418671	0.544201	0.256714	0.337562	0.19142	0.248589	0.323053
20220303_WT_DYN	20220303	WT	WT_R1	TAUb	DYN	F	71.2857	0.0268	4.54366	1770	29.5	0.257126		0.322398	0.301712	0.294005	0.391506	0.303031	0.368485	0.395795	0.141367	0.283293	0.293379	0.75072		0.389293	0.539746	0.337946	0.423224	0.283299	0.265577	0.332326
20220304_WT_DYN	20220304	WT	WT_RR	TAUs	DYN	F	71.4286	0.0317	5.60681	0	0	0.00287426		0.00585697	0.0171426	-0.00169082	-0.046006	0.0252043	-0.0122717	0.00494852	0.0147455	-0.00537871	0.0454248	0.0113339	0.00726609	0.0117509	0.0458933	-0.00720691	-0.0111177	0.000562839	-0.0185794	0
20220304_WT_DYN	20220304	WT	WT_RR	TAUs	DYN	F	71.4286	0.0317	5.60681	30	0.5	0.0260394		0.0492008	-0.00040388	0.00473139	-0.046503	-0.00561975	0.0308108	0.0425717	-0.00192136	0.0192049	-0.000252744	-0.0278278	-0.0150818	0.0200764	0.069907	-0.000124984	-0.0135412	0.00676653	0.00952202	0.0129868
20220304_WT_DYN	20220304	WT	WT_RR	TAUs	DYN	F	71.4286	0.0317	5.60681	60	1	0.0219275		0.0162655	0.0115914	-0.00639751	0.0220382	0.0363973	-0.0018229	0.00873565	0.0456185	0.0206642	0.0933368	0.0321341	0.012158	0.0195555	0.0662055	0.0507227	0.0319663	-0.0131945	0.0409869	0.0201356
20220304_WT_DYN	20220304	WT	WT_RR	TAUs	DYN	F	71.4286	0.0317	5.60681	90	1.5	0.0818347		0.0916791	0.00609372	0.0182685	0.151309	0.0449853	0.0245993	-0.00614691	0.011006	0.0243791	0.0810465	0.0176314	0.0627913	0.0384332	0.107273	0.0644629	0.0624055	0.017609	0.0609309	0.0454139
20220304_WT_DYN	20220304	WT	WT_RR	TAUs	DYN	F	71.4286	0.0317	5.60681	120	2	0.0279963		0.0680806	0.0354791	0.0082423	0.00890278	0.031727	0.042572	-0.0343037	-0.0488671	0.00971672	0.0579872	0.0212422	-0.0283027	0.0378422	0.100153	0.0123485	0.00472448	-0.0277085	0.0511591	0.0184097
20220304_WT_DYN	20220304	WT	WT_RR	TAUs	DYN	F	71.4286	0.0317	5.60681	150	2.5	0.0525635		0.0826477	0.029967	0.0608057	0.0965009	0.0345065	0.0491042	0.0502852	-0.00422117	0.0246975	0.0334767	-0.0179557	0.070203	0.0230694	0.0911621	0.0951016	0.0569026	0.0180325	0.0541867	0.0396941
20220304_WT_DYN	20220304	WT	WT_RR	TAUs	DYN	F	71.4286	0.0317	5.60681	180	3	0.130673		0.0301676	0.0350691	0.0261881	0.0232915	0.031156	0.0731426	0.0292334	0.0545472	0.0490284	0.0520819	0.024749	-0.000901987	0.0520253	0.100067	-0.0015706	0.0675354	-3.12303e-06	0.0427795	0.0433082
20220304_WT_DYN	20220304	WT	WT_RR	TAUs	DYN	F	71.4286	0.0317	5.60681	210	3.5	0.0492934		0.0261612	0.0580182	0.00593098	0.077968	0.0414702	0.00709148	-0.0429053	-0.0244308	0.0295356	0.0269151	0.0720404	0.00188208	0.024159	0.118248	0.0338129	0.104209	0.0227696	-0.00123801	0.0332344
20220304_WT_DYN	20220304	WT	WT_RR	TAUs	DYN	F	71.4286	0.0317	5.60681	240	4	0.0812434		0.0757996	0.0446888	0.0564652	0.116713	0.0446666	0.0399821	0.0530329	0.111729	0.0319679	0.0256003	0.0571844	0.0603887	0.0593094	0.119108	0.076256	0.0354596	0.0373216	-0.00135341	0.0517353
20220304_WT_DYN	20220304	WT	WT_RR	TAUs	DYN	F	71.4286	0.0317	5.60681	270	4.5	0.0178814		0.0433115	0.0694151	0.0438599	0.012012	0.0323901	0.0641924	0.0604403	0.0735859	0.0273	0.0823144	0.0219509	0.0517607	0.0669033	0.119833	0.0374116	0.0626882	0.0466572	0.0421727	0.0536371
20220304_WT_DYN	20220304	WT	WT_RR	TAUs	DYN	F	71.4286	0.0317	5.60681	300	5	0.0316073		0.1299	0.0768899	0.08842	-0.00333382	0.0425818	0.050853	-0.0269616	0.0111498	0.0381586	0.150442	-0.0228902	-0.0194636	0.0632925	0.134835	0.0314416	0.025333	0.0332306	0.0446465	0.0610577
20220304_WT_DYN	20220304	WT	WT_RR	TAUs	DYN	F	71.4286	0.0317	5.60681	330	5.5	0.0477042		0.105377	0.0602547	0.0407999	0.125499	0.132528	0.0974841	-0.0165478	-0.00433688	0.0765339	0.0547991	0.130346	0.036671	0.078357	0.0763197	0.144815	0.0720847	0.0932665	0.0475737	0.0748707
20220304_WT_DYN	20220304	WT	WT_RR	TAUs	DYN	F	71.4286	0.0317	5.60681	360	6	0.0465131		0.10643	0.0788707	0.0307276	0.200435	0.095965	0.0567669	0.0795943	-0.0343844	0.0528214	0.0219465	0.204673	0.0256224	0.0748974	0.159251	0.100039	0.229631	0.109982	0.0420879	0.0826844
20220304_WT_DYN	20220304	WT	WT_RR	TAUs	DYN	F	71.4286	0.0317	5.60681	390	6.5	0.0332793		0.176103	0.0535809	0.0828259	0.0861546	0.0739279	0.0420808	-0.0202717	0.0716877	0.0486707	0.124511	0.118422	0.0913214	0.0886624	0.167726	0.113187	0.0570391	0.0608038	0.0758711	0.0701805
20220304_WT_DYN	20220304	WT	WT_RR	TAUs	DYN	F	71.4286	0.0317	5.60681	420	7	0.0596092		0.0830097	0.102854	0.0636891	0.0558949	0.120142	0.109867	0.107967	0.120331	0.103221	0.110051	0.113963	0.0717661	0.0899818	0.129926	0.0779703	0.0701393	0.0846751	0.0560626	0.0897771
20220304_WT_DYN	20220304	WT	WT_RR	TAUs	DYN	F	71.4286	0.0317	5.60681	450	7.5	0.0360951		0.0983258	0.100814	0.0510461	0.00478278	0.110072	0.0615356	0.0238462	0.0817626	0.111007	0.139768	0.095675	0.0283568	0.100801	0.152373	0.104725	0.115185	0.0835209	0.0778932	0.0918522
20220304_WT_DYN	20220304	WT	WT_RR	TAUs	DYN	F	71.4286	0.0317	5.60681	480	8	0.0595214		0.155225	0.0880982	0.126352	0.086847	0.106014	0.10309	0.112995	0.115921	0.12146	0.0427278	0.210367	0.0541761	0.121193	0.23685	0.0632137	0.286917	0.104344	0.0789265	0.114551
20220304_WT_DYN	20220304	WT	WT_RR	TAUs	DYN	F	71.4286	0.0317	5.60681	510	8.5	0.136653		0.0900138	0.082877	0.0521437	0.0674126	0.0656494	0.0641941	0.00591136	0.0570846	0.099102	0.114267	0.0471268	0.0869951	0.111653	0.193205	0.0783851	0.107563	0.0588083	0.0825231	0.0891861
20220304_WT_DYN	20220304	WT	WT_RR	TAUs	DYN	F	71.4286	0.0317	5.60681	540	9	0.0857294		0.204506	0.0832965	0.108294	0.0904523	0.145014	0.0964321	0.00710615	0.0080871	0.0626379	0.237042	0.329064	0.195418	0.118402	0.17801	0.0850073	0.127304	0.0861605	0.151915	0.113196
20220304_WT_DYN	20220304	WT	WT_RR	TAUs	DYN	F	71.4286	0.0317	5.60681	570	9.5	0.127814		0.102839	0.106074	0.0905506	0.0197116	0.113573	0.0683621	0.0437638	0.0813079	0.107545	0.147822	0.138559	0.0437107	0.133722	0.180967	0.0734622	0.0980044	0.0771984	0.0688436	0.112938
20220304_WT_DYN	20220304	WT	WT_RR	TAUs	DYN	F	71.4286	0.0317	5.60681	600	10	0.0352823		0.116703	0.13199	0.0751217	0.194296	0.134483	0.124559	0.0671487	-0.00598659	0.104809	0.158414	0.13918	0.0545222	0.159071	0.267009	0.0975644	0.199167	0.0666169	0.19795	0.121873
20220304_WT_DYN	20220304	WT	WT_RR	TAUs	DYN	F	71.4286	0.0317	5.60681	630	10.5	0.160818		0.148459	0.177074	0.132122	0.123534	0.120525	0.085676	0.0479822	0.0799315	0.109297	0.133537	0.161575	0.133657	0.148529	0.248414	0.183776	0.208331	0.124701	0.0927683	0.144493
20220304_WT_DYN	20220304	WT	WT_RR	TAUs	DYN	F	71.4286	0.0317	5.60681	660	11	0.0885894		0.145131	0.127766	0.124484	0.185965	0.169456	0.157619	0.215228	0.0449338	0.0658667	0.118281	0.292017	0.129099	0.148267	0.21687	0.0806155	0.184749	0.105821	0.0808328	0.129509
20220304_WT_DYN	20220304	WT	WT_RR	TAUs	DYN	F	71.4286	0.0317	5.60681	690	11.5	0.0912258		0.12209	0.134214	0.078843	0.0595869	0.145034	0.110205	0.0586651	0.0919295	0.146233	0.161916	0.175326	0.133337	0.148792	0.317132	0.0599981	0.150608	0.0922262	0.0661057	0.119406
20220304_WT_DYN	20220304	WT	WT_RR	TAUs	DYN	F	71.4286	0.0317	5.60681	720	12	0.173096		0.292866	0.136226	0.154387	0.108017	0.145592	0.130965	0.138719	0.100476	0.161958	0.176213	0.168874	0.105011	0.17771	0.216236	0.10938	0.303117	0.186135	0.204811	0.169699
20220304_WT_DYN	20220304	WT	WT_RR	TAUs	DYN	F	71.4286	0.0317	5.60681	750	12.5	0.142734		0.210701	0.172539	0.0982738	0.163547	0.162958	0.161317	0.0397032	0.0721737	0.161614	0.186775	0.238362	0.10405	0.135262	0.254877	0.166104	0.145515	0.102352	0.206054	0.151681
20220304_WT_DYN	20220304	WT	WT_RR	TAUs	DYN	F	71.4286	0.0317	5.60681	780	13	0.166888		0.230647	0.170138	0.147603	0.0893535	0.133158	0.14251	0.117058	0.0603149	0.114559	0.0545313	0.123907	0.0499865	0.180684	0.246115	0.081078	0.133955	0.132661	0.127958	0.138689
20220304_WT_DYN	20220304	WT	WT_RR	TAUs	DYN	F	71.4286	0.0317	5.60681	810	13.5	0.107832		0.156408	0.163722	0.153358	0.0868537	0.168558	0.100544	0.156916	0.0736303	0.106803	0.0852368	0.124524	0.0983606	0.165599	0.261301	0.176094	0.113803	0.0996956	0.0524473	0.137124
20220304_WT_DYN	20220304	WT	WT_RR	TAUs	DYN	F	71.4286	0.0317	5.60681	840	14	0.0979669		0.247681	0.199459	0.137922	0.118083	0.203461	0.173749	0.184054	0.0191884	0.126718	0.227989	0.170739	0.108225	0.173136	0.333304	0.224211	0.187442	0.150374	0.191822	0.183501
20220304_WT_DYN	20220304	WT	WT_RR	TAUs	DYN	F	71.4286	0.0317	5.60681	870	14.5	0.153532		0.208583	0.196243	0.166865	0.104909	0.236401	0.178572	0.172203	0.0940044	0.145899	0.157605	0.180649	0.126208	0.188892	0.341914	0.153947	0.117304	0.0995036	0.20777	0.172756
20220304_WT_DYN	20220304	WT	WT_RR	TAUs	DYN	F	71.4286	0.0317	5.60681	900	15	0.170266		0.194967	0.221714	0.126917	0.202684	0.145205	0.152781	0.107745	0.0920788	0.160903	0.194954	0.161952	0.150009	0.170343	0.328225	0.189101	0.184942	0.0965914	0.169285	0.170213
20220304_WT_DYN	20220304	WT	WT_RR	TAUs	DYN	F	71.4286	0.0317	5.60681	930	15.5	0.189193		0.208385	0.219291	0.160601	0.270359	0.223436	0.142312	0.114133	0.0661586	0.156888	0.243814	0.135991	0.0978252	0.198311	0.335845	0.204929	0.25879	0.109067	0.167684	0.189369
20220304_WT_DYN	20220304	WT	WT_RR	TAUs	DYN	F	71.4286	0.0317	5.60681	960	16	0.201684		0.204602	0.200716	0.13996	0.207872	0.140544	0.145184	0.0713813	0.101592	0.162414	0.292076	0.223455	0.0979073	0.20046	0.363503	0.174904	0.243306	0.189367	0.192899	0.183052
20220304_WT_DYN	20220304	WT	WT_RR	TAUs	DYN	F	71.4286	0.0317	5.60681	990	16.5	0.126199		0.161309	0.170801	0.160738	0.101731	0.217564	0.236265	0.123007	0.0833005	0.176662	0.144997	0.295578	0.0544661	0.221142	0.327822	0.188899	0.16709	0.172752	0.126317	0.189637
20220304_WT_DYN	20220304	WT	WT_RR	TAUs	DYN	F	71.4286	0.0317	5.60681	1020	17	0.184428		0.258265	0.204637	0.106289	0.211484	0.231014	0.156859	0.192963	0.0786692	0.178829	0.245585	0.327654	0.091756	0.213009	0.467659	0.224029	0.307431	0.228826	0.189862	0.211617
20220304_WT_DYN	20220304	WT	WT_RR	TAUs	DYN	F	71.4286	0.0317	5.60681	1050	17.5	0.159946		0.191354	0.198414	0.158642	0.200865	0.177075	0.164621	0.186408	0.179895	0.140896	0.191133	0.242435	0.141172	0.206492	0.403132	0.147849	0.233253	0.111542	0.0923215	0.178933
20220304_WT_DYN	20220304	WT	WT_RR	TAUs	DYN	F	71.4286	0.0317	5.60681	1080	18	0.188736		0.275185	0.196978	0.139732	0.212165	0.20993	0.199976	0.251426	0.191362	0.214678	0.182972	0.299778	0.14033	0.235435	0.422551	0.085275	0.148293	0.138761	0.160007	0.202115
20220304_WT_DYN	20220304	WT	WT_RR	TAUs	DYN	F	71.4286	0.0317	5.60681	1110	18.5	0.151786		0.223127	0.187967	0.164041	0.129558	0.195996	0.16838	0.17187	0.143205	0.170775	0.30356	0.347701	0.0707315	0.227769	0.409614	0.199499	0.29919	0.196531	0.222666	0.204403
20220304_WT_DYN	20220304	WT	WT_RR	TAUs	DYN	F	71.4286	0.0317	5.60681	1140	19	0.249133		0.24954	0.225679	0.18717	0.23601	0.234428	0.181339	0.215341	0.17832	0.266256	0.188481	0.231658	0.154729	0.207893	0.431174	0.207152	0.255791	0.16432	0.233797	0.221141
20220304_WT_DYN	20220304	WT	WT_RR	TAUs	DYN	F	71.4286	0.0317	5.60681	1170	19.5	0.243542		0.181919	0.241584	0.117472	0.147603	0.180396	0.158332	0.170576	0.0840197	0.177526	0.1202	0.234584	0.12668	0.248616	0.354255	0.168428	0.30299	0.220128	0.160017	0.197501
20220304_WT_DYN	20220304	WT	WT_RR	TAUs	DYN	F	71.4286	0.0317	5.60681	1200	20	0.259706		0.232699	0.213416	0.190366	0.309005	0.298879	0.169073	0.133963	0.260037	0.190561	0.210242	0.23826	0.314678	0.216778	0.287444	0.188623	0.334406	0.178264	0.246819	0.216351
20220304_WT_DYN	20220304	WT	WT_RR	TAUs	DYN	F	71.4286	0.0317	5.60681	1230	20.5	0.118251		0.292399	0.189273	0.148983	0.275115	0.140929	0.134336	0.116616	0.0747551	0.18022	0.204641	0.262104	0.0244244	0.233418	0.451717	0.165677	0.279851	0.180961	0.179431	0.192151
20220304_WT_DYN	20220304	WT	WT_RR	TAUs	DYN	F	71.4286	0.0317	5.60681	1260	21	0.3197		0.202334	0.21258	0.220576	0.214412	0.231023	0.216686	0.158962	0.281797	0.162736	0.202739	0.143107	0.227435	0.235365	0.384395	0.180976	0.216317	0.1141	0.256042	0.202233
20220304_WT_DYN	20220304	WT	WT_RR	TAUs	DYN	F	71.4286	0.0317	5.60681	1290	21.5	0.220973		0.245005	0.20643	0.214157	0.130995	0.268537	0.207506	0.115581	0.247058	0.173565	0.179248	0.225628	0.249213	0.244906	0.474913	0.15528	0.178497	0.146438	0.148839	0.218963
20220304_WT_DYN	20220304	WT	WT_RR	TAUs	DYN	F	71.4286	0.0317	5.60681	1320	22	0.171826		0.252421	0.209312	0.174203	0.158139	0.233109	0.141965	0.0658384	0.14688	0.172644	0.263279	0.301418	0.0730877	0.215078	0.401725	0.192486	0.32603	0.118723	0.16469	0.197582
20220304_WT_DYN	20220304	WT	WT_RR	TAUs	DYN	F	71.4286	0.0317	5.60681	1350	22.5	0.185155		0.281002	0.209682	0.216524	0.243409	0.207586	0.235592	0.164988	0.157841	0.223201	0.20667	0.217141	0.116595	0.247876	0.425511	0.24308	0.235274	0.12089	0.167687	0.213764
20220304_WT_DYN	20220304	WT	WT_RR	TAUs	DYN	F	71.4286	0.0317	5.60681	1380	23	0.211077		0.17534	0.223633	0.196625	0.173327	0.149511	0.196409	0.168389	0.164055	0.146663	0.174226	0.207112	0.337001	0.217865	0.473209	0.194555	0.33463	0.147526	0.138014	0.202598
20220304_WT_DYN	20220304	WT	WT_RR	TAUs	DYN	F	71.4286	0.0317	5.60681	1410	23.5	0.268346		0.243073	0.209185	0.2207	0.148851	0.207841	0.190391	0.0470927	0.373941	0.216905	0.15219	0.261716	0.165995	0.2626	0.411114	0.20991	0.230362	0.16058	0.157585	0.220623
20220304_WT_DYN	20220304	WT	WT_RR	TAUs	DYN	F	71.4286	0.0317	5.60681	1440	24	0.224103		0.329915	0.166328	0.206696	0.0794332	0.203705	0.140909	0.11522	0.128604	0.159042	0.255245	0.210376	0.0739584	0.25564	0.311446	0.18706	0.208568	0.126275	0.135097	0.188627
20220304_WT_DYN	20220304	WT	WT_RR	TAUs	DYN	F	71.4286	0.0317	5.60681	1470	24.5	0.127533		0.133543	0.188614	0.110059	0.148981	0.161805	0.204766	0.147299	0.165582	0.196236	0.342788	0.145358	0.0679472	0.238918	0.477464	0.204857	0.270907	0.176122	0.169907	0.190667
20220304_WT_DYN	20220304	WT	WT_RR	TAUs	DYN	F	71.4286	0.0317	5.60681	1500	25	0.218597		0.32099	0.219262	0.249087	0.209768	0.293747	0.205357	0.181491	0.081543	0.224289	0.221807	0.429434	0.143674	0.249389	0.355861	0.308353	0.192553	0.19239	0.145093	0.229792
20220304_WT_DYN	20220304	WT	WT_RR	TAUs	DYN	F	71.4286	0.0317	5.60681	1530	25.5	0.31476		0.270014	0.218308	0.259101	0.213146	0.206157	0.208036	0.134482	0.256986	0.182625	0.243409	0.0897831	0.13346	0.243027	0.401716	0.134025	0.172474	0.0987261	0.196479	0.211321
20220304_WT_DYN	20220304	WT	WT_RR	TAUs	DYN	F	71.4286	0.0317	5.60681	1560	26	0.212505		0.251548	0.215926	0.229032	0.0571255	0.161354	0.175847	0.169782	0.235611	0.271055	0.287183	0.107364	0.219789	0.242854	0.486324	0.13322	0.242598	0.203084	0.202739	0.217446
20220304_WT_DYN	20220304	WT	WT_RR	TAUs	DYN	F	71.4286	0.0317	5.60681	1590	26.5	0.193985		0.252845	0.228149	0.186507	0.204069	0.213168	0.205091	0.234141	0.231496	0.159658	0.194129	0.171058	0.115405	0.227963	0.498567	0.185583	0.120889	0.156612	0.204754	0.199339
20220304_WT_DYN	20220304	WT	WT_RR	TAUs	DYN	F	71.4286	0.0317	5.60681	1620	27	0.253559		0.168699	0.203471	0.164707	0.198917	0.169171	0.183755	0.1357	0.161924	0.162353	0.197404	0.204211	0.189047	0.254337	0.383797	0.18004	0.3087	0.168054	0.165597	0.196469
20220304_WT_DYN	20220304	WT	WT_RR	TAUs	DYN	F	71.4286	0.0317	5.60681	1650	27.5	0.182773		0.199118	0.218725	0.249417	0.0666179	0.156459	0.14614	0.140221	0.119041	0.193681	0.153253	0.136689	0.167597	0.234798	0.550968	0.142745	0.177021	0.149392	0.132828	0.202204
20220304_WT_DYN	20220304	WT	WT_RR	TAUs	DYN	F	71.4286	0.0317	5.60681	1680	28	0.182638		0.229598	0.228224	0.119803	0.221862	0.201244	0.172982	0.131147	0.0983567	0.210561	0.174726	0.290169	0.102293	0.202706	0.417454	0.216439	0.289276	0.226978	0.165794	0.203654
20220304_WT_DYN	20220304	WT	WT_RR	TAUs	DYN	F	71.4286	0.0317	5.60681	1710	28.5	0.1854		0.252258	0.214423	0.132837	0.205359	0.170022	0.240978	0.110551	0.0560905	0.224521	0.168454	0.179787	0.156581	0.23869	0.440949	0.14434	0.174808	0.16392	0.176145	0.194982
20220304_WT_DYN	20220304	WT	WT_RR	TAUs	DYN	F	71.4286	0.0317	5.60681	1740	29	0.278686		0.260426	0.202837	0.229033	0.209696	0.197273	0.117505	0.166527	0.205157	0.151707	0.0705185	0.203123	0.0763812	0.223379	0.39605	0.202777	0.170279	0.133879	0.0749899	0.18826
20220304_WT_DYN	20220304	WT	WT_RR	TAUs	DYN	F	71.4286	0.0317	5.60681	1770	29.5	0.241948		0.208358	0.209241	0.173168	0.220282	0.196691	0.200363	0.156558	0.0820764	0.21513	0.189745	0.18992	0.232266	0.260403	0.402219	0.189713	0.231255	0.0990427	0.146523	0.204425
20220316_WT_DYN	20220316	WT	WT_R1	TAUs	DYN	F	73.1429	0.0252	6.15111	0	0	-0.0325333	-0.0760385	-0.0291234	0.00744226	-0.00416587	-0.0107199	0.0104425	0.0206056		-0.0629272	0.0694014	-0.0054902	0.0154735	0.000997897	0.0170309	0.0159437	-0.00244746	-0.0146945	0.00921397	-0.0174537	0
20220316_WT_DYN	20220316	WT	WT_R1	TAUs	DYN	F	73.1429	0.0252	6.15111	30	0.5	0.0857256	0.0496343	0.00366016	0.0102167	-0.0276551	0.00570544	0.0314521	0.0403287		-0.0149955	-0.00337413	0.0738556	0.0409063	-0.076945	0.016589	0.00759877	0.0462123	0.000553651	0.0121018	-0.00726786	0.0108566
20220316_WT_DYN	20220316	WT	WT_R1	TAUs	DYN	F	73.1429	0.0252	6.15111	60	1	0.0611666	0.0227042	0.0245561	0.0203312	0.00933536	-0.00257254	0.0950485	0.0725883		-0.0285985	0.00416917	0.083211	0.0579904	0.0112117	0.0267448	0.0470573	0.0411902	0.0207442	0.01052	-0.00981655	0.0272329
20220316_WT_DYN	20220316	WT	WT_R1	TAUs	DYN	F	73.1429	0.0252	6.15111	90	1.5	0.0666882	0.0312593	0.149117	0.0145701	0.0246376	-0.0433316	-0.0119626	0.0236788		-0.0606046	-0.0104406	0.123103	0.0339521	0.0485637	0.0499046	0.105771	-0.00476651	0.000227262	0.0321529	0.0679451	0.0292906
20220316_WT_DYN	20220316	WT	WT_R1	TAUs	DYN	F	73.1429	0.0252	6.15111	120	2	0.115838	-0.0346673	0.0496868	0.0444034	-0.0332866	-0.0102406	0.0454596	0.0337737		-0.062074	0.0341118	0.0902371	0.0577369	0.0174105	0.0385536	0.108139	-0.0069927	0.0307496	-0.00744798	-0.0166834	0.0269007
20220316_WT_DYN	20220316	WT	WT_R1	TAUs	DYN	F	73.1429	0.0252	6.15111	150	2.5	0.039338	-0.0210971	0.0267896	0.0434771	0.000855476	-0.0497224	0.049725	0.0270024		-0.0466449	0.0564475	0.15469	0.00415333	-0.00423107	0.0632534	0.0935778	0.0588227	0.0522634	0.0625536	0.0267077	0.0489691
20220316_WT_DYN	20220316	WT	WT_R1	TAUs	DYN	F	73.1429	0.0252	6.15111	180	3	0.0764733	-0.0343012	0.0655775	0.0237818	0.0269791	0.126915	0.0230346	0.0321188		0.122296	0.0360451	0.116858	0.0327549	0.0833661	0.0493773	0.117681	0.0265735	0.0507877	-0.00104337	0.0189408	0.0300657
20220316_WT_DYN	20220316	WT	WT_R1	TAUs	DYN	F	73.1429	0.0252	6.15111	210	3.5	0.137023	0.01514	0.0345367	0.0506242	0.0630812	0.088059	0.0976119	0.0611375		0.13001	0.0418985	0.14179	0.072897	-0.0326685	0.0632895	0.10994	0.0504829	0.0930019	0.0481252	0.00814647	0.0624642
20220316_WT_DYN	20220316	WT	WT_R1	TAUs	DYN	F	73.1429	0.0252	6.15111	240	4	0.0924592	-0.025687	0.084265	0.0558504	0.0415342	0.178741	0.0683149	-0.0034171		0.0821685	0.0678077	0.178663	0.0961403	0.179832	0.0486842	0.146827	0.0304628	0.208456	0.0669149	0.0218213	0.0672785
20220316_WT_DYN	20220316	WT	WT_R1	TAUs	DYN	F	73.1429	0.0252	6.15111	270	4.5	0.0829663	0.150653	0.125898	0.0573025	0.0544938	0.0320445	0.0761195	0.0907662		0.0909348	0.0735177	0.127268	0.117774	0.0129906	0.0752087	0.147972	0.0610846	0.102561	0.0540793	0.0393224	0.0683806
20220316_WT_DYN	20220316	WT	WT_R1	TAUs	DYN	F	73.1429	0.0252	6.15111	300	5	0.0883312	0.116892	0.0103769	0.0745166	0.00439885	-0.00696159	0.0444708	0.0365122		0.0181288	0.0902234	0.146053	0.0361956	0.0155326	0.0663566	0.0900871	0.0338192	0.0590165	0.0198039	-0.029541	0.0574302
20220316_WT_DYN	20220316	WT	WT_R1	TAUs	DYN	F	73.1429	0.0252	6.15111	330	5.5	0.047654	0.232025	0.0498508	0.0762528	0.0502942	0.211837	0.11097	0.0673821		-0.0207639	0.0722182	0.134768	0.125424	-0.048555	0.0633324	0.133916	0.0578119	0.103082	0.0500498	0.0480972	0.0659138
20220316_WT_DYN	20220316	WT	WT_R1	TAUs	DYN	F	73.1429	0.0252	6.15111	360	6	0.0457605	-0.0386899	0.0548298	0.0412058	-0.00747746	0.0182737	0.0685138	0.0845057		-0.0519244	0.0565552	0.196952	0.0291499	0.069245	0.0824912	0.0715058	0.0198591	0.0555434	0.0510637	0.114983	0.0537366
20220316_WT_DYN	20220316	WT	WT_R1	TAUs	DYN	F	73.1429	0.0252	6.15111	390	6.5	0.0748365	0.0840267	0.0918973	0.0919979	0.0338321	0.0753075	0.109282	-0.0102412		0.13206	0.0440661	0.136675	0.112175	-0.0189794	0.0793597	0.104716	0.0114692	0.074291	0.0342612	0.0120704	0.0653763
20220316_WT_DYN	20220316	WT	WT_R1	TAUs	DYN	F	73.1429	0.0252	6.15111	420	7	0.0886171	0.0512037	0.0490531	0.0449506	0.0230865	0.0254499	0.100274	0.057884		0.161423	0.0684258	0.14792	0.227811	0.0217829	0.0571946	0.0940053	0.0994393	0.0965949	0.0553631	0.0329871	0.0587677
20220316_WT_DYN	20220316	WT	WT_R1	TAUs	DYN	F	73.1429	0.0252	6.15111	450	7.5	0.0688952	0.0533866	0.0917048	0.0496746	0.0497249	0.0311528	0.0771698	-0.00920353		0.0971557	0.0615277	0.14053	0.0615721	0.0397505	0.0637005	0.12232	0.0741171	0.0497367	0.055016	-0.0112425	0.0573484
20220316_WT_DYN	20220316	WT	WT_R1	TAUs	DYN	F	73.1429	0.0252	6.15111	480	8	0.128966	0.0501927	0.0512595	0.0486312	0.0405052	-0.0124677	0.115782	0.076794		0.000149921	0.0407464	0.137046	0.0478654	0.0709003	0.0799137	0.087936	0.0956154	0.0506159	0.0163679	-0.0262586	0.0654751
20220316_WT_DYN	20220316	WT	WT_R1	TAUs	DYN	F	73.1429	0.0252	6.15111	510	8.5	0.0491794	-0.0546351	0.102655	0.0466466	0.00988786	-0.00835246	0.0450215	0.0316562		-0.0190001	0.125735	0.244999	0.0373506	0.00952738	0.0771245	0.218083	0.0362804	0.0620026	0.0212598	-9.07143e-05	0.0683873
20220316_WT_DYN	20220316	WT	WT_R1	TAUs	DYN	F	73.1429	0.0252	6.15111	540	9	0.108134	-0.0375068	0.0215304	0.049784	0.043599	0.177513	0.0732881	0.0514264		0.0844111	0.0210361	0.0238462	0.132043	-0.0414225	0.063203	0.14919	0.0300519	0.125217	0.0175028	0.0337976	0.0528919
20220316_WT_DYN	20220316	WT	WT_R1	TAUs	DYN	F	73.1429	0.0252	6.15111	570	9.5	0.0424421	-0.00125183	0.0960889	0.0302655	-0.0144697	0.190524	0.0828841	0.0584007		0.0465324	0.0480802	0.132023	0.103074	0.00848817	0.0609225	0.109026	0.0428511	0.0416815	0.0561957	0.0474368	0.0502312
20220316_WT_DYN	20220316	WT	WT_R1	TAUs	DYN	F	73.1429	0.0252	6.15111	600	10	0.106399	-0.0436227	0.07115	0.0477121	0.0750696	0.0998802	0.0728319	0.0295265		0.0158298	0.0236116	0.12566	0.0668953	0.180072	0.0670503	0.0598033	0.0718041	0.0567356	0.0597253	0.00811389	0.0567034
20220316_WT_DYN	20220316	WT	WT_R1	TAUs	DYN	F	73.1429	0.0252	6.15111	630	10.5	0.0818257	0.0561537	0.0506133	0.0489614	0.0228838	0.0185841	0.140549	0.0420153		-0.00640567	0.0604411	0.0162412	0.128939	-0.0377554	0.0614085	0.0884053	0.0763543	0.0586465	-0.0153991	0.0242662	0.0525544
20220316_WT_DYN	20220316	WT	WT_R1	TAUs	DYN	F	73.1429	0.0252	6.15111	660	11	0.142106	-0.0148129	0.0328363	0.0197436	0.00278147	0.0749425	0.0418305	0.053328		0.144995	0.100361	0.0506381	0.0558235	0.0232106	0.0580753	0.151447	0.0341371	0.170747	0.0201892	0.0484463	0.0602759
20220316_WT_DYN	20220316	WT	WT_R1	TAUs	DYN	F	73.1429	0.0252	6.15111	690	11.5	0.065487	0.132761	0.0118712	0.0489825	-0.033684	0.0617321	0.0753613	-0.0236588		0.0815196	0.0381987	0.0662973	0.121684	0.0336942	0.0770473	0.0964667	0.062247	0.147465	0.00991484	-0.0391764	0.0359162
20220316_WT_DYN	20220316	WT	WT_R1	TAUs	DYN	F	73.1429	0.0252	6.15111	720	12	0.0362334	-0.0308552	0.0122692	0.028588	0.0195659	-0.0027204	0.0806745	0.000732738		0.0954554	0.0976674	0.0858628	0.0517336	0.105804	0.0657387	0.124656	0.0596101	0.0469748	0.0211144	-0.0118023	0.0503662
20220316_WT_DYN	20220316	WT	WT_R1	TAUs	DYN	F	73.1429	0.0252	6.15111	750	12.5	0.0160788	-0.0510537	0.00638242	0.0103316	0.00823909	0.0614416	0.0412827	0.0787281		0.0145288	0.0239167	0.203906	0.00820905	0.130337	0.0670389	0.176321	0.0241903	0.0936811	0.00828877	-0.00415321	0.0418746
20220316_WT_DYN	20220316	WT	WT_R1	TAUs	DYN	F	73.1429	0.0252	6.15111	780	13	-0.00457532	-0.0296348	0.02973	0.0458322	0.0110751	0.0125052	0.0875033	0.0346714		-0.0278997	0.0310047	0.0991817	0.0951819	0.0251829	0.0854966	0.0825163	-0.0325209	0.0167808	-0.000895873	-0.00991008	0.0416993
20220316_WT_DYN	20220316	WT	WT_R1	TAUs	DYN	F	73.1429	0.0252	6.15111	810	13.5	-0.0231954	-0.0802486	0.0247467	0.037585	-0.00948353	0.0318034	0.0485874	-0.00533429		-0.0332539	0.0416816	0.165715	0.0697961	0.0972883	0.037751	0.0974878	-0.0349152	0.0629933	0.0255002	0.0254071	0.031242
20220316_WT_DYN	20220316	WT	WT_R1	TAUs	DYN	F	73.1429	0.0252	6.15111	840	14	0.0561087	0.00917222	0.0326882	0.0221969	0.0215284	-0.0696135	0.0395044	0.0347095		0.0221568	0.0339218	0.120295	0.00646365	-0.0119517	0.0431434	0.126581	0.0551023	0.0662481	0.0162256	0.0184362	0.0345862
20220316_WT_DYN	20220316	WT	WT_R1	TAUs	DYN	F	73.1429	0.0252	6.15111	870	14.5	0.0597453	-0.0192849	0.0886906	0.0341539	0.0107743	0.0262927	0.0121004	-0.0237398		0.0363776	-0.0155786	0.122354	0.127199	0.0713557	0.0338568	0.0897969	-0.0388596	0.0339723	0.00664698	-0.0248124	0.0216985
20220316_WT_DYN	20220316	WT	WT_R1	TAUs	DYN	F	73.1429	0.0252	6.15111	900	15	0.0224233	-0.0495673	0.0499795	0.0244513	-0.0266548	-0.0261623	0.0612974	0.0307187		0.0368383	0.0494182	0.117009	0.0748518	-0.0708942	0.0336169	0.0504094	0.02715	0.0438093	0.00193321	0.0949921	0.0230636
20220316_WT_DYN	20220316	WT	WT_R1	TAUs	DYN	F	73.1429	0.0252	6.15111	930	15.5	0.101518	-0.0783248	0.0139971	0.0372224	0.0139072	-0.080585	0.0419465	0.0344631		0.0373479	0.0586344	0.126888	0.0324254	-0.0895061	0.0668718	0.0865768	0.0305604	-0.00164837	-0.000362817	-0.0248618	0.0332912
20220316_WT_DYN	20220316	WT	WT_R1	TAUs	DYN	F	73.1429	0.0252	6.15111	960	16	0.101076	-0.0463789	0.0753029	0.040403	0.0455193	0.040837	0.0426454	-0.00931869		0.144298	-0.0107903	0.0838485	0.0245203	-0.029075	0.0379863	0.168506	-0.00751869	0.07918	0.00164361	0.0195079	0.0295399
20220316_WT_DYN	20220316	WT	WT_R1	TAUs	DYN	F	73.1429	0.0252	6.15111	990	16.5	0.0529201	-0.0656448	-0.00689619	0.0371804	-0.00644845	-0.00864921	0.0526614	0.0770986		0.0185903	0.0627008	0.0223325	0.0542475	-0.0351347	0.0490423	0.135908	-0.0157617	0.0676718	-0.00505448	-0.0394756	0.0246297
20220316_WT_DYN	20220316	WT	WT_R1	TAUs	DYN	F	73.1429	0.0252	6.15111	1020	17	0.0625318	-0.0282978	0.104657	0.0242919	0.00770067	-0.0200389	0.0665877	0.0139348		0.0225398	0.0702542	0.0882915	0.159275	-0.0556633	0.0756329	0.0849807	-0.00227476	0.0202931	-0.0347208	-0.0526117	0.028064
20220316_WT_DYN	20220316	WT	WT_R1	TAUs	DYN	F	73.1429	0.0252	6.15111	1050	17.5	0.0370539	0.0460285	0.0696669	0.012098	-0.0162667	-0.0205058	0.0154667	0.0467246		-0.029992	0.0883048	0.172087	0.0315345	-0.0259062	0.035324	0.116229	-0.00212214	0.0280273	0.00861917	0.130672	0.0316172
20220316_WT_DYN	20220316	WT	WT_R1	TAUs	DYN	F	73.1429	0.0252	6.15111	1080	18	0.0763703	-0.089251	0.0462256	-0.00839659	0.0129605	-0.0167995	0.0371237	0.0335148		-0.0602833	0.0680197	0.148171	0.066652	0.0158338	0.0397743	0.115602	0.01602	0.0508277	-0.0209166	0.101959	0.0257025
20220316_WT_DYN	20220316	WT	WT_R1	TAUs	DYN	F	73.1429	0.0252	6.15111	1110	18.5	0.0674181	-0.0382995	0.0182175	0.0634708	0.0337764	0.035202	0.0212311	0.0215313		0.0596802	0.053255	0.103686	0.0192516	0.134684	0.0370186	0.0987851	0.0284218	0.054549	0.0714808	-0.0518257	0.04414
20220316_WT_DYN	20220316	WT	WT_R1	TAUs	DYN	F	73.1429	0.0252	6.15111	1140	19	0.101006	-0.0582988	-0.0142156	0.0419685	0.0314607	-0.0131112	0.0424131	0.0214832		0.0817141	0.0572787	0.00598472	0.152687	-0.0457158	0.0574205	0.126831	0.0297325	0.0343371	0.0269341	-0.0199358	0.0310204
20220316_WT_DYN	20220316	WT	WT_R1	TAUs	DYN	F	73.1429	0.0252	6.15111	1170	19.5	0.130004	-0.062819	0.0311372	0.0127263	-0.0135581	-0.048374	0.072704	0.0275196		0.0607813	0.041471	0.0608324	0.0140835	-0.062202	0.0567323	0.134002	0.00999921	-0.0107806	-0.0341563	-0.0187398	0.0198652
20220316_WT_DYN	20220316	WT	WT_R1	TAUs	DYN	F	73.1429	0.0252	6.15111	1200	20	0.00249504	-0.0600513	-0.00554429	0.0178308	-0.0312605	-0.0601181	0.0712875	0.0210997		0.109514	-0.0140053	0.105461	0.022781	-0.0379374	0.0255657	0.0703695	-0.041964	-0.00135948	0.0148185	0.00484595	0.00655583
20220316_WT_DYN	20220316	WT	WT_R1	TAUs	DYN	F	73.1429	0.0252	6.15111	1230	20.5	-0.0410179	-0.0214922	-0.0202881	0.0176073	0.0140568	0.00814123	0.0292841	0.0372895		-0.0634613	-0.0113725	0.0243142	-0.0166834	-0.0297934	0.0384631	0.116721	0.048483	-0.0414413	0.000721984	0.0124831	0.0126121
20220316_WT_DYN	20220316	WT	WT_R1	TAUs	DYN	F	73.1429	0.0252	6.15111	1260	21	0.0498919	-0.0511364	0.025433	0.0527343	-0.0100321	-0.0276497	0.0031327	0.0166241		-0.0166117	0.0634725	-0.00646528	0.193438	0.00845647	0.0323491	0.109558	-0.000742341	0.0737777	0.0556435	0.00622377	0.0268625
20220316_WT_DYN	20220316	WT	WT_R1	TAUs	DYN	F	73.1429	0.0252	6.15111	1290	21.5	0.0462657	0.0577776	0.00541536	0.0279733	-0.0262532	0.0842673	0.0228388	0.0484852		0.04371	0.0316862	0.150323	0.124298	-0.0531368	0.0572188	0.10351	0.00662401	0.0888976	-0.0379355	-0.029144	0.0331863
20220316_WT_DYN	20220316	WT	WT_R1	TAUs	DYN	F	73.1429	0.0252	6.15111	1320	22	0.0610033	-0.0022371	0.0690395	0.0141639	0.0143433	0.0333636	0.0588644	0.0805415		0.0746698	0.0226516	0.102867	-0.000278968	-0.0259052	0.0540969	0.0709537	0.0178208	0.0390977	0.0213857	0.0700559	0.0314943
20220316_WT_DYN	20220316	WT	WT_R1	TAUs	DYN	F	73.1429	0.0252	6.15111	1350	22.5	-0.0082169	-0.0248341	0.0163305	0.0319179	0.00267528	-0.0148688	0.0444517	0.0232973		-0.00137421	0.0634619	0.0715617	0.0213636	0.0327218	0.037497	0.11858	0.024211	0.0200069	0.0534387	0.0976558	0.0407461
20220316_WT_DYN	20220316	WT	WT_R1	TAUs	DYN	F	73.1429	0.0252	6.15111	1380	23	0.0166057	-0.0344901	0.078112	0.0463652	-0.0290836	0.0806269	0.0374745	-0.0274907		-0.00792675	0.020304	0.135109	0.00051123	-0.0761708	0.0298266	0.101694	0.0284637	0.0997847	0.0154349	-0.0522739	0.0258173
20220316_WT_DYN	20220316	WT	WT_R1	TAUs	DYN	F	73.1429	0.0252	6.15111	1410	23.5	0.0522369	-0.0493208	0.0472971	0.0528479	-0.00303528	0.0192387	0.0177485	0.0148355		-0.0240057	0.0170102	0.0890405	-0.0359134	-0.0289742	0.0360156	0.10707	0.00401036	0.0244708	-0.00392187	-0.0321546	0.0255632
20220316_WT_DYN	20220316	WT	WT_R1	TAUs	DYN	F	73.1429	0.0252	6.15111	1440	24	0.0130857	-0.00498968	-0.00731008	-0.0118304	0.0402433	0.00844099	0.0347366	0.0624978		-0.0134256	0.0266316	0.0799761	0.0711807	0.00191948	0.0544592	0.153221	-0.00523667	0.0207	0.0120213	0.0497717	0.0337798
20220316_WT_DYN	20220316	WT	WT_R1	TAUs	DYN	F	73.1429	0.0252	6.15111	1470	24.5	0.105215	-0.0606955	0.0443947	0.0092306	-0.00815548	-0.0139479	-0.00921548	-0.0110081		0.022171	0.00844123	0.117461	0.0280512	-0.063072	0.0288733	0.0680251	-0.0153511	-0.0111628	-0.0129288	-0.0135931	0.00367718
20220316_WT_DYN	20220316	WT	WT_R1	TAUs	DYN	F	73.1429	0.0252	6.15111	1500	25	0.04091	-0.0489049	-0.0180313	0.0166642	-0.011977	-0.0180394	0.0688707	0.0376627		0.0100262	0.0439346	-0.00363099	0.0363359	-0.0587829	0.0418618	0.0341715	-0.0507451	0.0555011	-0.0580637	0.061451	0.0144093
20220316_WT_DYN	20220316	WT	WT_R1	TAUs	DYN	F	73.1429	0.0252	6.15111	1530	25.5	0.0396047	0.0391843	0.0205509	0.0106265	-0.0203692	-0.0245949	0.010773	0.0109824		-0.0242853	0.0294415	0.030005	0.0257862	-0.0345257	0.0393329	0.103957	-0.00300187	0.0271102	0.020847	-0.0166461	0.0152733
20220316_WT_DYN	20220316	WT	WT_R1	TAUs	DYN	F	73.1429	0.0252	6.15111	1560	26	0.0245144	-0.0144809	0.0664356	0.0286348	-0.0232531	-0.0739153	0.0175311	-0.00394071		-0.0330187	0.0186893	0.026837	0.0333094	-0.0107527	0.00825349	0.0673777	-0.0025646	-0.0279808	-0.0251234	-0.0374795	0.00547909
20220316_WT_DYN	20220316	WT	WT_R1	TAUs	DYN	F	73.1429	0.0252	6.15111	1590	26.5	0.000842619	0.0754494	-0.0142073	0.0182378	-0.00472679	-0.047575	0.0131374	0.00360254		-0.0726772	0.0314457	-0.0031673	-0.0197332	0.00557806	0.0372913	0.0896307	-0.00364425	-0.018761	-0.0293919	-0.00106853	0.00496119
20220316_WT_DYN	20220316	WT	WT_R1	TAUs	DYN	F	73.1429	0.0252	6.15111	1620	27	0.0899908	-0.0308806	-0.0263948	-0.0207224	-0.0569278	-0.0401389	-0.00292484	0.0604334		-0.0172385	0.010054	0.132517	0.000328889	-0.0648476	0.0265578	0.0681718	-0.0443077	0.0472044	-0.0315496	-0.0399512	-0.00320198
20220316_WT_DYN	20220316	WT	WT_R1	TAUs	DYN	F	73.1429	0.0252	6.15111	1650	27.5	0.113483	-0.0641487	-0.0255042	-0.00562798	-0.0102955	0.216001	0.0432429	-0.010647		0.0124074	-0.0301537	-0.00259028	0.0753608	-0.046279	0.0256612	0.0509092	-0.00497984	0.0559314	-0.0204563	-0.0049729	0.00095877
20220316_WT_DYN	20220316	WT	WT_R1	TAUs	DYN	F	73.1429	0.0252	6.15111	1680	28	0.0539646	0.0202753	0.0376633	0.0376784	-0.0228738	0.0839723	0.0309106	-0.00425694		-0.0647258	0.00117456	0.0994663	0.0840879	-0.0608427	0.0435646	0.0546102	-0.0014004	0.0766537	-0.0224156	-0.0405112	0.021874
20220316_WT_DYN	20220316	WT	WT_R1	TAUs	DYN	F	73.1429	0.0252	6.15111	1710	28.5	0.0237966	-0.0874558	-0.0228465	-0.0166123	-0.0502911	0.0485435	0.0393604	0.0175993		-0.0257822	0.0468237	0.141844	0.117291	-0.0532671	0.0394591	0.0947071	-0.0169246	0.0616167	-0.027227	-0.0174781	0.0063752
20220316_WT_DYN	20220316	WT	WT_R1	TAUs	DYN	F	73.1429	0.0252	6.15111	1740	29	0.0512635	-0.0526937	0.0279608	0.00411563	-0.0383107	0.112069	0.0137604	-0.0209193		-0.0744882	-0.0195274	0.0769316	-0.0362048	-0.0771878	0.00458131	0.128829	0.0208778	0.0173853	-0.0468955	-0.0577622	2.42063e-05
20220316_WT_DYN	20220316	WT	WT_R1	TAUs	DYN	F	73.1429	0.0252	6.15111	1770	29.5	-0.00994099	0.22065	-0.025957	0.00537155	-0.0337306	-0.0311362	-0.00811254	-0.0138599		0.00916587	0.00395837	0.143608	-0.00525607	-0.0469859	0.0352512	0.123912	-0.052274	-0.029324	-0.0122562	-0.0907192	-0.00192806
20220321_PS19_DYN	20220321	PS19	PS19_F1	ABs	DYN	F	56.7143	0.0265	5.90178	0	0	0.00293992		0.00551521	-0.0128905	-0.0113558	0.00662442	-0.0126367	-0.00492233	-0.0144087	-0.0264285	-0.00061766	0.0116026	0.0441586	-0.0407234	-0.00203317	0.0335669	-0.00273528	-0.00816502	-0.0134849	-0.0146666	0
20220321_PS19_DYN	20220321	PS19	PS19_F1	ABs	DYN	F	56.7143	0.0265	5.90178	30	0.5	-0.0226608		0.0365695	-0.00365022	-0.0141551	0.00631513	-0.00846324	0.000392226	-0.0408322	-0.0364	-0.00991611	0.0142823	-0.000754679	-0.0408752	0.00470166	0.0132638	0.0109597	0.0262864	-0.0258534	-0.0189329	0.00141577
20220321_PS19_DYN	20220321	PS19	PS19_F1	ABs	DYN	F	56.7143	0.0265	5.90178	60	1	0.00357049		-0.0222626	0.0364188	-0.0110143	-0.0213993	-0.0138557	-0.0157171	-0.0323839	-0.0228342	0.0230386	-0.0277155	-0.0270411	-0.0408752	-0.0026026	0.0407708	0.00291581	-0.011679	-0.0173612	-0.00320752	0.00788917
20220321_PS19_DYN	20220321	PS19	PS19_F1	ABs	DYN	F	56.7143	0.0265	5.90178	90	1.5	0.00378574		0.0230803	-0.00759025	-0.0135476	-0.0201709	0.0710449	-0.0287566	-0.0312184	0.272819	0.00129494	0.0460949	-0.0333333	-0.0407234	-0.0160323	0.0514582	0.0540851	-0.00490272	0.0772295	-0.0106765	0.0137953
20220321_PS19_DYN	20220321	PS19	PS19_F1	ABs	DYN	F	56.7143	0.0265	5.90178	120	2	-0.0233175		0.053607	0.00667913	-0.00800631	-0.00404744	-0.00612164	-0.0183295	0.0343795	-0.0119637	0.00965853	0.00346034	-0.0282263	-0.0407993	0.0069474	0.0357746	-0.00729574	0.0348258	-0.0122793	0.00469098	0.00695091
20220321_PS19_DYN	20220321	PS19	PS19_F1	ABs	DYN	F	56.7143	0.0265	5.90178	150	2.5	-0.0135626		0.0112683	-0.00451131	0.0247667	-0.011719	0.00692921	-0.0232796	-0.0216283	0.225916	0.00154358	0.0289699	-0.0189728	0.00540694	-0.00855157	0.0573674	0.0408218	-0.0169777	0.0333165	0.0444572	0.00761887
20220321_PS19_DYN	20220321	PS19	PS19_F1	ABs	DYN	F	56.7143	0.0265	5.90178	180	3	0.0936018		-0.0279956	0.0441169	-0.026264	0.0201873	0.023374	0.00849302	-0.029872	-0.0116023	-0.0229835	-0.00187317	0.0287995	0.00686509	-0.00405447	0.0396898	-0.00187506	0.018995	-0.0268558	-0.0220332	0.00922857
20220321_PS19_DYN	20220321	PS19	PS19_F1	ABs	DYN	F	56.7143	0.0265	5.90178	210	3.5	0.000940415		0.0256556	0.0475256	0.0143573	-0.018191	-0.0126244	0.01104	-0.00448855	0.00477457	-0.00110826	0.059854	-0.0143675	-0.0398044	0.00318143	0.116801	0.0142578	0.0375524	0.00963913	-0.00290921	0.0274586
20220321_PS19_DYN	20220321	PS19	PS19_F1	ABs	DYN	F	56.7143	0.0265	5.90178	240	4	0.012404		0.0210993	0.0518821	0.00654208	0.00888223	0.0137878	0.0176581	0.0252088	0.100894	-0.0128517	0.0305176	0.030536	-0.0329537	0.0177386	0.00526226	0.00487151	0.0275712	0.0187599	0.0199004	0.0210296
20220321_PS19_DYN	20220321	PS19	PS19_F1	ABs	DYN	F	56.7143	0.0265	5.90178	270	4.5	0.0262684		0.0101176	0.0136867	0.00219	-0.0142651	-0.00052366	0.0106121	0.0625129	-0.0403745	-0.00792512	0.0380279	0.0129013	0.123155	0.0109828	0.0836686	0.012847	0.0468668	0.0530246	0.0307408	0.0227755
20220321_PS19_DYN	20220321	PS19	PS19_F1	ABs	DYN	F	56.7143	0.0265	5.90178	300	5	-0.00360218		0.0723146	-0.00587477	0.023102	0.110684	-0.00991232	0.0709434	0.139753	0.0143854	0.0377307	-0.0195171	-0.00478188	-0.0138881	0.0440158	0.112386	0.0680885	0.00424042	0.0487003	0.0645152	0.0375697
20220321_PS19_DYN	20220321	PS19	PS19_F1	ABs	DYN	F	56.7143	0.0265	5.90178	330	5.5	0.0595104		0.0570274	0.038524	0.0421443	0.00137011	0.0228518	0.0371955	0.0218578	0.0585556	-0.00173683	0.0933477	-0.00148675	0.0179703	0.0365633	0.206336	0.0315714	-0.025087	-0.00169257	0.0695811	0.0522176
20220321_PS19_DYN	20220321	PS19	PS19_F1	ABs	DYN	F	56.7143	0.0265	5.90178	360	6	0.069204		0.0234348	0.00504819	-0.00740668	-0.0355663	0.0169427	0.00330657	-0.0100257	-0.0326633	0.0184877	-0.00408301	0.0144349	0.0486148	0.0536069	0.107381	-0.00478183	-0.0312779	0.0449924	-0.00965663	0.0277302
20220321_PS19_DYN	20220321	PS19	PS19_F1	ABs	DYN	F	56.7143	0.0265	5.90178	390	6.5	0.0281561		0.0111778	0.00839238	0.0142633	-0.000448189	0.00952075	0.00169415	0.0303077	-0.000676491	0.0174247	0.0507434	0.214487	0.13922	0.0352063	0.0863286	0.00910151	0.056048	0.0295052	-0.00119196	0.0249819
20220321_PS19_DYN	20220321	PS19	PS19_F1	ABs	DYN	F	56.7143	0.0265	5.90178	420	7	0.0672947		0.111188	0.01298	0.0211994	0.0755083	0.016593	0.0340279	0.0909038	0.0239145	0.0685703	0.101155	0.000953623	0.022787	0.0385386	0.0691668	0.0740814	0.124047	0.061567	0.0717505	0.0527671
20220321_PS19_DYN	20220321	PS19	PS19_F1	ABs	DYN	F	56.7143	0.0265	5.90178	450	7.5	0.0233614		0.0619515	0.0422208	0.0291314	-0.0379574	0.0759226	0.0667752	0.0503518	0.112491	0.0412312	0.148158	0.0117166	-0.0372862	0.0486898	0.123004	-0.00811865	0.0311453	0.0112961	0.0546921	0.056813
20220321_PS19_DYN	20220321	PS19	PS19_F1	ABs	DYN	F	56.7143	0.0265	5.90178	480	8	0.0544677		0.0284956	0.115694	0.00746321	0.0845481	0.0903234	0.023212	-0.021232	-0.0218009	0.100011	0.0349948	0.0217783	-0.0406145	0.06462	0.0643474	0.075589	0.0609077	-0.00688786	0.00743657	0.0665793
20220321_PS19_DYN	20220321	PS19	PS19_F1	ABs	DYN	F	56.7143	0.0265	5.90178	510	8.5	0.090262		0.111652	0.0571201	0.066519	0.0525642	0.0643966	0.097444	0.0423869	0.000985094	0.0256013	0.0864224	0.16217	0.00957883	0.0564754	0.118207	0.034478	0.0411339	0.0198034	0.177286	0.0642592
20220321_PS19_DYN	20220321	PS19	PS19_F1	ABs	DYN	F	56.7143	0.0265	5.90178	540	9	0.0381182		0.0170389	0.0276609	0.0410801	0.036579	0.0283784	0.0179622	0.0130106	0.0103536	0.0319932	0.0357666	0.184689	0.0636666	0.0704617	0.153209	0.0459432	0.128844	0.0592155	0.0277306	0.0520686
20220321_PS19_DYN	20220321	PS19	PS19_F1	ABs	DYN	F	56.7143	0.0265	5.90178	570	9.5	0.0712899		0.113158	0.0621651	0.0660297	0.0789867	0.0716946	0.0640696	0.0710092	0.0276042	0.0572951	0.0928377	0.132672	0.0190324	0.0675676	0.153774	0.0520823	0.04002	0.0311477	0.0653148	0.0737979
20220321_PS19_DYN	20220321	PS19	PS19_F1	ABs	DYN	F	56.7143	0.0265	5.90178	600	10	0.156893		0.124798	0.0842118	0.0966555	0.0621753	0.0854735	0.0393875	0.057044	0.100574	0.0645909	0.106267	0.144876	0.0993892	0.072053	0.185018	0.0411718	0.11217	0.0306648	0.113486	0.0917031
20220321_PS19_DYN	20220321	PS19	PS19_F1	ABs	DYN	F	56.7143	0.0265	5.90178	630	10.5	0.101691		0.11004	0.115527	0.0663643	0.0747408	0.100438	0.0660126	0.037034	0.123965	0.0688691	0.0617935	-0.00415442	0.13576	0.11089	0.198626	0.0448503	0.128987	0.133509	0.0415349	0.100044
20220321_PS19_DYN	20220321	PS19	PS19_F1	ABs	DYN	F	56.7143	0.0265	5.90178	660	11	0.104942		0.0454125	0.147673	0.0622298	0.0642938	0.070849	0.0678795	0.0826664	0.0970858	0.0913158	0.146475	0.0927723	0.0806171	0.0883521	0.232178	0.0786275	0.0570181	0.1256	0.0764614	0.104815
20220321_PS19_DYN	20220321	PS19	PS19_F1	ABs	DYN	F	56.7143	0.0265	5.90178	690	11.5	0.0324638		0.173383	0.0984874	0.0734078	0.13899	0.0878402	0.0674237	0.0118084	0.0399398	0.0797249	0.0893463	0.144854	0.0395817	0.0936826	0.212872	0.0932085	0.0675832	0.0724974	0.0536312	0.0969829
20220321_PS19_DYN	20220321	PS19	PS19_F1	ABs	DYN	F	56.7143	0.0265	5.90178	720	12	0.227529		0.113868	0.0994796	0.137165	0.0400042	0.186378	0.105611	0.12037	0.207625	0.0798955	0.147203	0.283915	0.0674036	0.13319	0.221344	0.0561627	0.105409	0.0822797	0.118663	0.130879
20220321_PS19_DYN	20220321	PS19	PS19_F1	ABs	DYN	F	56.7143	0.0265	5.90178	750	12.5	0.0836594		0.0885677	0.120094	0.072446	0.250191	0.0640848	0.0912577	0.0764311	0.0197772	0.0615672	0.125868	0.324106	0.0979168	0.133746	0.21061	0.151943	0.110622	0.115397	0.0768959	0.116347
20220321_PS19_DYN	20220321	PS19	PS19_F1	ABs	DYN	F	56.7143	0.0265	5.90178	780	13	0.133144		0.184529	0.115066	0.0696168	0.0605168	0.147921	0.079176	0.0539082	0.199807	0.115342	0.145356	0.227997	0.0394712	0.109205	0.348489	0.108757	0.0744599	0.0723949	0.067835	0.128771
20220321_PS19_DYN	20220321	PS19	PS19_F1	ABs	DYN	F	56.7143	0.0265	5.90178	810	13.5	0.145661		0.188883	0.148421	0.12703	0.06626	0.114506	0.119649	0.245834	0.0354481	0.161402	0.153838	0.179285	0.216083	0.123905	0.261756	0.065908	0.0873698	0.100357	0.135158	0.140568
20220321_PS19_DYN	20220321	PS19	PS19_F1	ABs	DYN	F	56.7143	0.0265	5.90178	840	14	0.0509792		0.115811	0.119899	0.121387	0.0532334	0.10307	0.106572	0.0478209	0.104996	0.0855252	0.0887756	0.121754	-0.00241596	0.138116	0.294888	0.0490386	0.0801634	0.0402241	0.0741106	0.1211
20220321_PS19_DYN	20220321	PS19	PS19_F1	ABs	DYN	F	56.7143	0.0265	5.90178	870	14.5	0.118991		0.204279	0.110941	0.180493	0.246237	0.121144	0.120237	0.091065	0.386491	0.115257	0.213121	0.30899	0.0711489	0.148252	0.36854	0.152843	0.140644	0.180087	0.125483	0.165422
20220321_PS19_DYN	20220321	PS19	PS19_F1	ABs	DYN	F	56.7143	0.0265	5.90178	900	15	0.295389		0.123145	0.139633	0.107982	0.193621	0.136698	0.107338	0.115264	0.150175	0.0644126	0.199894	0.400788	0.00903011	0.1616	0.279053	0.180379	0.121713	0.133027	0.159072	0.159709
20220321_PS19_DYN	20220321	PS19	PS19_F1	ABs	DYN	F	56.7143	0.0265	5.90178	930	15.5	0.268191		0.12333	0.186759	0.156922	0.123783	0.126451	0.130917	0.147015	0.140176	0.147002	0.208856	0.190768	0.318126	0.174473	0.416395	0.120334	0.133925	0.142859	0.138549	0.172862
20220321_PS19_DYN	20220321	PS19	PS19_F1	ABs	DYN	F	56.7143	0.0265	5.90178	960	16	0.161879		0.183157	0.162393	0.154143	0.154555	0.183264	0.0845574	0.14833	0.279976	0.112369	0.189674	0.196815	0.158594	0.153525	0.286607	0.10439	0.212515	0.134112	0.118969	0.165132
20220321_PS19_DYN	20220321	PS19	PS19_F1	ABs	DYN	F	56.7143	0.0265	5.90178	990	16.5	0.147152		0.173231	0.19213	0.141254	0.187563	0.181424	0.0657792	0.0653579	0.132033	0.162122	0.130609	0.197412	0.112424	0.166332	0.215346	0.183878	0.207799	0.112051	0.104766	0.172094
20220321_PS19_DYN	20220321	PS19	PS19_F1	ABs	DYN	F	56.7143	0.0265	5.90178	1020	17	0.211689		0.271334	0.172759	0.179464	0.105548	0.129159	0.149034	0.254739	0.147596	0.205322	0.0948309	0.155825	0.188984	0.18879	0.449116	0.177102	0.252155	0.107661	0.201679	0.205599
20220321_PS19_DYN	20220321	PS19	PS19_F1	ABs	DYN	F	56.7143	0.0265	5.90178	1050	17.5	0.182908		0.149583	0.19442	0.140632	0.0570581	0.189916	0.149655	0.141093	0.0741975	0.186186	0.183342	0.201942	0.0579669	0.19649	0.332591	0.0906978	0.0878027	0.102929	0.148299	0.183161
20220321_PS19_DYN	20220321	PS19	PS19_F1	ABs	DYN	F	56.7143	0.0265	5.90178	1080	18	0.200321		0.241202	0.14208	0.152236	0.0631965	0.137127	0.168256	0.189999	0.293505	0.132415	0.291819	0.264589	0.0375179	0.203443	0.395472	0.13772	0.204827	0.165069	0.256083	0.195509
20220321_PS19_DYN	20220321	PS19	PS19_F1	ABs	DYN	F	56.7143	0.0265	5.90178	1110	18.5	0.111687		0.195011	0.179148	0.182415	0.264977	0.178147	0.158852	0.0787786	0.109375	0.110792	0.193464	0.106266	0.0516511	0.215902	0.403759	0.228203	0.167212	0.205296	0.135046	0.201462
20220321_PS19_DYN	20220321	PS19	PS19_F1	ABs	DYN	F	56.7143	0.0265	5.90178	1140	19	0.247511		0.151259	0.161786	0.159342	0.311657	0.12587	0.195849	0.190669	0.139308	0.102197	0.159433	0.375043	0.15314	0.218781	0.344601	0.199871	0.21757	0.0961046	0.211573	0.191056
20220321_PS19_DYN	20220321	PS19	PS19_F1	ABs	DYN	F	56.7143	0.0265	5.90178	1170	19.5	0.222336		0.194267	0.189134	0.180945	0.316672	0.22124	0.143393	0.223403	0.311886	0.16363	0.231183	0.271703	0.24591	0.202021	0.368963	0.253694	0.374543	0.157102	0.225856	0.208016
20220321_PS19_DYN	20220321	PS19	PS19_F1	ABs	DYN	F	56.7143	0.0265	5.90178	1200	20	0.273094		0.339921	0.199253	0.212768	0.0811991	0.141701	0.256457	0.187167	0.0376575	0.158297	0.217308	0.162082	0.129134	0.25252	0.294443	0.161151	0.121696	0.207749	0.201054	0.219063
20220321_PS19_DYN	20220321	PS19	PS19_F1	ABs	DYN	F	56.7143	0.0265	5.90178	1230	20.5	0.231849		0.282565	0.221731	0.217054	0.178291	0.267218	0.161507	0.125206	0.174051	0.167717	0.198259	0.263696	0.0688259	0.233209	0.346177	0.147387	0.385025	0.178996	0.107711	0.229915
20220321_PS19_DYN	20220321	PS19	PS19_F1	ABs	DYN	F	56.7143	0.0265	5.90178	1260	21	0.136339		0.223409	0.153458	0.179014	0.243988	0.303884	0.146386	0.152022	0.316797	0.175141	0.215574	0.550049	0.232142	0.24856	0.38391	0.156004	0.255008	0.204539	0.128507	0.221689
20220321_PS19_DYN	20220321	PS19	PS19_F1	ABs	DYN	F	56.7143	0.0265	5.90178	1290	21.5	0.221569		0.299389	0.223945	0.322939	0.313909	0.244866	0.192359	0.16623	0.4479	0.161973	0.213034	0.145555	0.171435	0.267244	0.474498	0.173367	0.369514	0.213115	0.143812	0.249647
20220321_PS19_DYN	20220321	PS19	PS19_F1	ABs	DYN	F	56.7143	0.0265	5.90178	1320	22	0.121391		0.304031	0.214953	0.235734	0.180971	0.210782	0.185646	0.206066	0.112367	0.20527	0.220836	0.311426	0.186339	0.264778	0.369541	0.206928	0.311815	0.301621	0.250404	0.248577
20220321_PS19_DYN	20220321	PS19	PS19_F1	ABs	DYN	F	56.7143	0.0265	5.90178	1350	22.5	0.199823		0.161747	0.269347	0.222767	0.237742	0.195177	0.20953	0.154996	0.181245	0.270088	0.175252	0.472896	0.099496	0.244765	0.410247	0.20705	0.265434	0.142863	0.159532	0.235262
20220321_PS19_DYN	20220321	PS19	PS19_F1	ABs	DYN	F	56.7143	0.0265	5.90178	1380	23	0.301951		0.230435	0.294709	0.173365	0.0889375	0.208514	0.175989	0.0872627	0.199453	0.105288	0.172003	0.175281	0.0141119	0.291267	0.396209	0.135781	0.206441	0.12918	0.154156	0.225722
20220321_PS19_DYN	20220321	PS19	PS19_F1	ABs	DYN	F	56.7143	0.0265	5.90178	1410	23.5	0.360216		0.184868	0.243028	0.163713	0.204961	0.126153	0.133783	0.171586	0.131665	0.184724	0.282756	0.122297	0.312829	0.244137	0.589756	0.287488	0.252025	0.191505	0.247219	0.241204
20220321_PS19_DYN	20220321	PS19	PS19_F1	ABs	DYN	F	56.7143	0.0265	5.90178	1440	24	0.254052		0.307086	0.241724	0.187193	0.0980609	0.194945	0.228422	0.22172	0.0677682	0.16452	0.218178	0.238176	0.0222786	0.28257	0.475787	0.158169	0.220638	0.0801867	0.211608	0.241771
20220321_PS19_DYN	20220321	PS19	PS19_F1	ABs	DYN	F	56.7143	0.0265	5.90178	1470	24.5	0.206036		0.335404	0.238953	0.246817	0.220611	0.242759	0.25377	0.295822	0.154436	0.136206	0.244416	0.258632	0.192579	0.283195	0.432445	0.115122	0.243037	0.223396	0.270227	0.255123
20220321_PS19_DYN	20220321	PS19	PS19_F1	ABs	DYN	F	56.7143	0.0265	5.90178	1500	25	0.346969		0.239393	0.178521	0.190853	0.195056	0.206844	0.32456	0.179211	0.125821	0.165635	0.267748	0.221102	0.099135	0.303394	0.393307	0.158707	0.305512	0.131727	0.303073	0.248326
20220321_PS19_DYN	20220321	PS19	PS19_F1	ABs	DYN	F	56.7143	0.0265	5.90178	1530	25.5	0.277946		0.198621	0.215854	0.224666	0.148742	0.312411	0.20699	0.136557	0.0987851	0.242603	0.288324	0.661292	0.426274	0.267152	0.381124	0.272913	0.301499	0.258907	0.190038	0.267216
20220321_PS19_DYN	20220321	PS19	PS19_F1	ABs	DYN	F	56.7143	0.0265	5.90178	1560	26	0.300213		0.314657	0.334247	0.258977	0.0454854	0.299328	0.320853	0.242183	0.276418	0.268147	0.276942	0.4503	0.0787588	0.294264	0.495748	0.212049	0.165389	0.246309	0.203025	0.286115
20220321_PS19_DYN	20220321	PS19	PS19_F1	ABs	DYN	F	56.7143	0.0265	5.90178	1590	26.5	0.172878		0.169878	0.249535	0.216257	0.188063	0.228757	0.252479	0.175473	0.289292	0.148383	0.191948	0.338334	0.259694	0.254616	0.391041	0.154604	0.335907	0.148012	0.145346	0.226641
20220321_PS19_DYN	20220321	PS19	PS19_F1	ABs	DYN	F	56.7143	0.0265	5.90178	1620	27	0.284116		0.210059	0.322131	0.24262	0.21142	0.16464	0.231421	0.288601	0.4915	0.243598	0.202855	0.339202	0.332478	0.287433	0.542949	0.232024	0.192342	0.19825	0.31112	0.275733
20220321_PS19_DYN	20220321	PS19	PS19_F1	ABs	DYN	F	56.7143	0.0265	5.90178	1650	27.5	0.389784		0.261858	0.282955	0.183434	0.306217	0.231908	0.178793	0.12022	0.112058	0.240877	0.271951	0.293914	0.184753	0.268198	0.582422	0.216454	0.125608	0.189951	0.208382	0.265122
20220321_PS19_DYN	20220321	PS19	PS19_F1	ABs	DYN	F	56.7143	0.0265	5.90178	1680	28	0.237414		0.195748	0.307877	0.217503	0.16077	0.231933	0.285578	0.152768	0.125375	0.187149	0.17784	0.225219	0.15168	0.302579	0.421082	0.211583	0.162166	0.113282	0.153978	0.247566
20220321_PS19_DYN	20220321	PS19	PS19_F1	ABs	DYN	F	56.7143	0.0265	5.90178	1710	28.5	0.351409		0.311488	0.370719	0.167631	0.104092	0.331272	0.278518	0.191935	0.0984804	0.247297	0.401601	0.349755	0.129858	0.336235	0.659943	0.199216	0.165025	0.18875	0.231446	0.309404
20220321_PS19_DYN	20220321	PS19	PS19_F1	ABs	DYN	F	56.7143	0.0265	5.90178	1740	29	0.188547		0.394598	0.274194	0.34021	0.271032	0.221404	0.199339	0.206764	0.38609	0.241116	0.186382	0.333809	0.194972	0.292641	0.543121	0.261472	0.202295	0.12812	0.185688	0.269085
20220321_PS19_DYN	20220321	PS19	PS19_F1	ABs	DYN	F	56.7143	0.0265	5.90178	1770	29.5	0.186129		0.217081	0.235831	0.182929	0.0785384	0.365716	0.186358	0.167259	0.403496	0.278422	0.186531	0.363418	0.0620527	0.258762	0.547339	0.203478	0.125299	0.140439	0.16779	0.250977
20220323_PS19_DYN	20220323	PS19	PS19_F3	ABs	DYN	F	57	0.0228	5.1472	0	0	-0.0131974		0.0867133	0.018712	-0.0200696	-0.0306475	0.056423	-0.0798434			-0.0420174	0.0602541	0.0701495		0.00866754	0.142729	-0.0555399	-0.0954784	-0.00158408	-0.0797481	0
20220323_PS19_DYN	20220323	PS19	PS19_F3	ABs	DYN	F	57	0.0228	5.1472	30	0.5	0.00909776		0.0867432	0.00683509	0.00854969	-0.0882248	-0.0117938	-0.12053			-0.0821636	-0.0385053	0.041367		0.0123355	0.104698	-0.062598	-0.0521511	-0.0256961	-0.101535	-0.0180269
20220323_PS19_DYN	20220323	PS19	PS19_F3	ABs	DYN	F	57	0.0228	5.1472	60	1	-0.0297779		0.0740284	0.066959	0.0462966	-0.0305939	0.0170826	-0.0746984			-0.00773434	0.0229487	0.0340443		0.0251261	0.182988	0.016101	-0.0281247	-0.0326205	-0.0478203	0.0118794
20220323_PS19_DYN	20220323	PS19	PS19_F3	ABs	DYN	F	57	0.0228	5.1472	90	1.5	0.103036		-0.0122767	0.0206432	0.0184623	-0.0814235	-0.0320912	0.0172475			-0.00127465	-0.0119517	0.00569075		0.0617779	0.129955	-0.0751033	-0.0150358	-0.0791274	-0.0486647	0.00784566
20220323_PS19_DYN	20220323	PS19	PS19_F3	ABs	DYN	F	57	0.0228	5.1472	120	2	-0.0314213		0.066926	0.0704442	0.0520599	0.0182629	0.0207154	-0.0686657			0.0234585	-0.00593649	-0.122709		0.0528969	0.145187	0.0650364	-0.0597126	-0.0480341	0.0175289	0.0222259
20220323_PS19_DYN	20220323	PS19	PS19_F3	ABs	DYN	F	57	0.0228	5.1472	150	2.5	-0.0465569		0.102137	0.0403933	0.0423105	-0.1029	0.02016	-0.0819975			0.0191629	-0.0148468	-0.0579721		0.0526109	0.0937436	-0.0907466	-0.0866814	-0.070723	-0.0684639	-0.00274956
20220323_PS19_DYN	20220323	PS19	PS19_F3	ABs	DYN	F	57	0.0228	5.1472	180	3	0.067973		0.149516	0.0913985	0.0337056	-0.00763496	0.00132899	-0.0708501			0.00844382	0.0651592	-0.00976171		0.0415605	0.10118	-0.0109172	-0.0418346	0.0504469	0.0246482	0.0317279
20220323_PS19_DYN	20220323	PS19	PS19_F3	ABs	DYN	F	57	0.0228	5.1472	210	3.5	0.0301907		0.113918	0.0438334	0.0704516	-0.0265038	-0.0421345	-0.086426			-0.0291324	0.082871	-0.0499116		0.0326344	0.363949	0.0987224	-0.0379781	-0.00150377	0.0414664	0.0234628
20220323_PS19_DYN	20220323	PS19	PS19_F3	ABs	DYN	F	57	0.0228	5.1472	240	4	0.0804789		0.04036	0.0386043	0.00532162	-0.0751838	-0.0311611	-0.046282			-0.0332867	-0.0639003	0.0750272		0.0596801	0.0800404	-0.0789767	0.00450658	-0.0092161	-0.0513303	0.00319412
20220323_PS19_DYN	20220323	PS19	PS19_F3	ABs	DYN	F	57	0.0228	5.1472	270	4.5	0.0849301		0.0684715	0.0264064	-0.00791149	0.0154749	0.0307474	0.00460399			-0.0230204	0.00324	0.0720731		0.0823349	0.0913205	0.0370053	0.129065	0.00259702	0.110963	0.0265353
20220323_PS19_DYN	20220323	PS19	PS19_F3	ABs	DYN	F	57	0.0228	5.1472	300	5	-0.0586696		0.0905435	0.0714877	-0.0617952	-0.0380427	0.00260539	-0.113627			0.00911566	0.0476642	0.0132012		0.0564619	0.193901	0.0137329	-0.0375802	-0.0408364	-0.0508153	-0.000979035
20220323_PS19_DYN	20220323	PS19	PS19_F3	ABs	DYN	F	57	0.0228	5.1472	330	5.5	0.00521044		0.0951986	0.0316439	0.0499093	-0.0106615	0.0392838	0.0238468			-0.0466077	0.0434056	0.0320188		0.11784	0.15658	0.00806254	-0.0618007	-0.0488883	-0.0441102	0.029669
20220323_PS19_DYN	20220323	PS19	PS19_F3	ABs	DYN	F	57	0.0228	5.1472	360	6	-0.0216565		0.100438	0.0437932	0.0407983	-0.0235683	0.116154	-0.0431125			0.016077	0.0684084	-0.00300825		0.0975298	0.235615	0.0137647	0.083433	-0.0364136	-0.0494261	0.0390925
20220323_PS19_DYN	20220323	PS19	PS19_F3	ABs	DYN	F	57	0.0228	5.1472	390	6.5	0.0868281		0.066469	0.100324	0.0691088	0.21372	0.0385104	-0.00613386			-0.0172876	0.0334757	0.0443786		0.0845593	0.225963	0.0293284	-0.0166908	-0.0371263	-0.0910461	0.0370613
20220323_PS19_DYN	20220323	PS19	PS19_F3	ABs	DYN	F	57	0.0228	5.1472	420	7	0.0280861		0.112456	0.10507	0.0975014	0.0766629	0.0465288	-0.0459176			0.0296704	-0.0320338	-0.00841298		0.0913591	0.226268	-0.0490922	-0.0578293	-0.0742557	-0.0757939	0.0361709
20220323_PS19_DYN	20220323	PS19	PS19_F3	ABs	DYN	F	57	0.0228	5.1472	450	7.5	0.0819312		0.0694438	0.0309151	0.00324026	0.0308446	-0.0132491	0.00706925			0.00195754	0.112118	0.00301987		0.11032	0.292781	-0.0163741	0.077487	0.0626585	0.042077	0.0444936
20220323_PS19_DYN	20220323	PS19	PS19_F3	ABs	DYN	F	57	0.0228	5.1472	480	8	0.131121		0.0743408	0.122499	0.137407	-0.101972	0.108931	0.0463125			0.046642	0.0732125	0.0160611		0.100396	0.176021	0.0205679	-0.0453176	-0.0115107	0.0240004	0.0565266
20220323_PS19_DYN	20220323	PS19	PS19_F3	ABs	DYN	F	57	0.0228	5.1472	510	8.5	0.0146369		0.0164112	0.0841996	0.0206217	-0.0315734	0.00177728	-0.0608621			-0.0492171	0.00138772	-0.0309145		0.0813894	0.18704	0.18485	-0.0398987	-0.0471186	-0.0577909	0.0265045
20220323_PS19_DYN	20220323	PS19	PS19_F3	ABs	DYN	F	57	0.0228	5.1472	540	9	0.0554371		0.0769758	0.121151	0.0313963	-0.030451	0.0449199	0.0485919			0.0958438	0.131694	0.172685		0.113422	0.165695	-0.0245296	-0.0329689	-0.0226324	0.0505009	0.0578359
20220323_PS19_DYN	20220323	PS19	PS19_F3	ABs	DYN	F	57	0.0228	5.1472	570	9.5	0.0802185		0.194424	0.129272	0.143241	0.0614091	0.0382181	0.138821			0.0143234	0.0636025	0.0572465		0.130605	0.34975	-0.0262687	-0.00412456	-0.0685083	-0.0209265	0.0515891
20220323_PS19_DYN	20220323	PS19	PS19_F3	ABs	DYN	F	57	0.0228	5.1472	600	10	-0.0219964		0.0990256	0.151935	0.0804237	-0.0344453	-0.0099164	0.0163121			0.021215	-0.0148353	0.0224859		0.100897	0.305421	0.0366793	-0.0504121	-0.0144832	0.0670636	0.0522514
20220323_PS19_DYN	20220323	PS19	PS19_F3	ABs	DYN	F	57	0.0228	5.1472	630	10.5	0.113733		0.268448	0.127903	0.041134	-0.00796101	0.0182586	-0.030186			0.150387	0.142296	0.0460522		0.0858125	0.216794	0.0664784	-0.00315965	0.0362365	0.0438622	0.0669437
20220323_PS19_DYN	20220323	PS19	PS19_F3	ABs	DYN	F	57	0.0228	5.1472	660	11	0.0471134		0.146067	0.108545	0.0514214	0.0778332	0.0390221	0.00294443			0.0414339	0.0653721	0.0681362		0.0960848	0.332169	0.0929592	0.0542345	0.0333595	0.119525	0.059246
20220323_PS19_DYN	20220323	PS19	PS19_F3	ABs	DYN	F	57	0.0228	5.1472	690	11.5	-0.00813241		0.158594	0.0599914	0.153016	0.0382501	0.0880339	0.0539851			0.0213782	0.102768	0.0642806		0.112217	0.290908	-0.00715864	0.131527	0.0294413	0.0414015	0.0585524
20220323_PS19_DYN	20220323	PS19	PS19_F3	ABs	DYN	F	57	0.0228	5.1472	720	12	0.0948845		0.195016	0.0740593	0.109907	-0.00947623	0.0265126	0.0271876			0.0180864	0.138647	-0.00259355		0.0815476	0.324912	-0.000763289	-0.0270925	0.0184409	-0.0488637	0.0548979
20220323_PS19_DYN	20220323	PS19	PS19_F3	ABs	DYN	F	57	0.0228	5.1472	750	12.5	0.166592		0.171302	0.111264	0.102215	0.00865557	0.111839	0.0141893			-0.0339803	0.0526872	0.0689802		0.125706	0.327463	-0.0410361	-0.0587686	0.0472079	0.00126649	0.0667486
20220323_PS19_DYN	20220323	PS19	PS19_F3	ABs	DYN	F	57	0.0228	5.1472	780	13	0.12794		-0.0187803	0.0845961	0.0138286	-0.0318561	0.0104196	0.0509134			0.0450075	0.13162	0.00696329		0.117926	0.325307	0.0200401	0.0360172	-0.00410592	-0.0194319	0.0354381
20220323_PS19_DYN	20220323	PS19	PS19_F3	ABs	DYN	F	57	0.0228	5.1472	810	13.5	0.184355		0.0313928	0.1053	0.0536386	0.117542	0.0899493	0.126068			0.0819335	0.0447012	0.00843123		0.136541	0.397395	0.0320024	-0.0432446	0.0196007	0.0379953	0.0770862
20220323_PS19_DYN	20220323	PS19	PS19_F3	ABs	DYN	F	57	0.0228	5.1472	840	14	0.0169669		0.200219	0.0762207	0.00963167	-0.126912	-0.0240181	-0.0284268			0.05446	0.0884802	-0.0426648		0.10816	0.305469	0.00395811	0.0374531	0.00883026	0.0176179	0.0373221
20220323_PS19_DYN	20220323	PS19	PS19_F3	ABs	DYN	F	57	0.0228	5.1472	870	14.5	0.0640482		0.162277	0.133094	0.0789388	-0.0510596	0.0457161	-0.00345781			0.0773875	0.141981	0.0936155		0.121746	0.316905	-0.00975864	0.0703588	0.0423585	0.114192	0.0728559
20220323_PS19_DYN	20220323	PS19	PS19_F3	ABs	DYN	F	57	0.0228	5.1472	900	15	0.141519		0.177505	0.049427	0.156438	0.227845	0.0454717	0.0633029			-0.0316408	-0.0172138	0.141027		0.163979	0.321724	-0.0367252	0.134427	0.0421218	0.0698716	0.0751575
20220323_PS19_DYN	20220323	PS19	PS19_F3	ABs	DYN	F	57	0.0228	5.1472	930	15.5	0.105376		0.219276	0.140769	0.046593	-0.00660776	0.0920756	-0.0359655			0.141751	0.10889	0.12672		0.176463	0.211791	0.046145	0.0377653	0.0370418	0.247014	0.0946506
20220323_PS19_DYN	20220323	PS19	PS19_F3	ABs	DYN	F	57	0.0228	5.1472	960	16	0.0346282		0.272994	0.156802	0.105753	0.0330967	0.136968	-0.0693525			0.00449412	0.0140252	0.0678323		0.160746	0.300102	0.0146355	0.026592	-0.0129803	0.0169213	0.080845
20220323_PS19_DYN	20220323	PS19	PS19_F3	ABs	DYN	F	57	0.0228	5.1472	990	16.5	0.0356794		0.0992132	0.121104	0.0503217	0.00731715	0.134283	-0.000672237			0.0747049	0.109723	0.0184625		0.153464	0.257525	0.0313592	0.0145843	0.00840943	0.0259167	0.0808399
20220323_PS19_DYN	20220323	PS19	PS19_F3	ABs	DYN	F	57	0.0228	5.1472	1020	17	0.108164		0.280958	0.12869	0.145026	-0.00728246	0.141435	-0.00184373			0.0524765	0.105822	0.155495		0.172519	0.18999	0.0298277	0.171854	-0.0512576	-0.0300568	0.0936478
20220323_PS19_DYN	20220323	PS19	PS19_F3	ABs	DYN	F	57	0.0228	5.1472	1050	17.5	0.219646		0.16833	0.125488	0.127929	-0.0692764	0.0506666	0.0370406			0.0197928	0.0532286	0.0138271		0.164618	0.31458	-0.0380584	-0.000170789	0.103391	0.15377	0.0864019
20220323_PS19_DYN	20220323	PS19	PS19_F3	ABs	DYN	F	57	0.0228	5.1472	1080	18	0.023249		0.206235	0.12436	0.0829444	-0.0449164	0.205408	-0.0652249			0.027831	0.041742	0.0693656		0.0986895	0.278589	-0.0468409	-0.0623558	-0.00626316	-0.003105	0.0740817
20220323_PS19_DYN	20220323	PS19	PS19_F3	ABs	DYN	F	57	0.0228	5.1472	1110	18.5	-0.0111352		0.164733	0.165674	0.160229	-0.0273439	0.080992	0.102724			0.103743	0.0568362	0.175447		0.170893	0.343063	0.0502286	0.148017	0.0681405	0.0413491	0.123567
20220323_PS19_DYN	20220323	PS19	PS19_F3	ABs	DYN	F	57	0.0228	5.1472	1140	19	0.130036		0.276922	0.139126	0.219861	0.0532713	0.0163285	0.176116			0.0835103	0.143568	0.00170825		0.212519	0.240525	-0.0362989	0.0491162	0.0687163	0.0338197	0.108207
20220323_PS19_DYN	20220323	PS19	PS19_F3	ABs	DYN	F	57	0.0228	5.1472	1170	19.5	0.0660942		0.154268	0.098747	0.0977662	-0.0757943	0.116412	-0.015557			0.0735501	0.14744	-0.00479553		0.17287	0.22801	0.0338928	0.0845816	0.0671262	-0.0322266	0.0790284
20220323_PS19_DYN	20220323	PS19	PS19_F3	ABs	DYN	F	57	0.0228	5.1472	1200	20	0.0905425		0.15174	0.194806	0.101328	-0.0429814	0.0816218	-0.0312537			0.0448899	0.0301846	0.0701341		0.166323	0.340139	0.0496307	-0.0123454	0.0320814	0.0618105	0.0918539
20220323_PS19_DYN	20220323	PS19	PS19_F3	ABs	DYN	F	57	0.0228	5.1472	1230	20.5	0.0502177		0.258628	0.176388	0.100913	0.0322918	0.0821509	-0.00445904			0.0502762	0.127433	0.0303841		0.181354	0.318947	-0.0461485	0.0991618	0.0417997	0.00641531	0.105918
20220323_PS19_DYN	20220323	PS19	PS19_F3	ABs	DYN	F	57	0.0228	5.1472	1260	21	0.071252		0.0959164	0.122298	0.0451986	-0.0919942	0.0370975	0.117967			0.0243049	0.134511	0.0385667		0.123259	0.435014	0.178908	0.0386294	0.0310203	-0.00478807	0.0818451
20220323_PS19_DYN	20220323	PS19	PS19_F3	ABs	DYN	F	57	0.0228	5.1472	1290	21.5	0.127181		0.0729981	0.153101	0.0533267	-0.0469421	0.115966	0.00616684			0.102702	0.0673906	-0.0416129		0.168586	0.232429	-0.0229026	-0.00685193	0.0254974	0.197923	0.0793546
20220323_PS19_DYN	20220323	PS19	PS19_F3	ABs	DYN	F	57	0.0228	5.1472	1320	22	0.105455		0.221432	0.154351	0.105394	-0.13496	0.14615	-0.0275007			0.0862236	0.213051	0.0792137		0.156875	0.344155	0.00178816	-0.0840863	0.104363	-0.0489957	0.0994994
20220323_PS19_DYN	20220323	PS19	PS19_F3	ABs	DYN	F	57	0.0228	5.1472	1350	22.5	0.0678592		0.144784	0.12762	0.0467294	0.131134	0.115508	0.0432628			0.0233525	0.173568	0.149445		0.173747	0.221022	0.0980484	0.0533904	0.00680487	-0.00790921	0.0897286
20220323_PS19_DYN	20220323	PS19	PS19_F3	ABs	DYN	F	57	0.0228	5.1472	1380	23	0.281055		0.171748	0.145656	0.0767383	0.00193469	0.0333811	-0.0689167			0.0505161	0.143857	-0.00254083		0.161632	0.335511	0.0583351	0.0793138	0.072385	0.0182571	0.10031
20220323_PS19_DYN	20220323	PS19	PS19_F3	ABs	DYN	F	57	0.0228	5.1472	1410	23.5	0.164392		0.330834	0.166383	0.181392	-0.0464509	-0.0225717	0.0209056			0.10848	0.097867	0.0616499		0.194563	0.306813	0.122087	0.0983824	0.0578202	0.0608186	0.107435
20220323_PS19_DYN	20220323	PS19	PS19_F3	ABs	DYN	F	57	0.0228	5.1472	1440	24	0.0879796		0.336878	0.130447	0.124219	-0.0809591	0.0816664	0.203999			0.101031	0.0384713	0.0881746		0.188979	0.400799	0.151274	0.0401085	0.0402521	0.226438	0.132201
20220323_PS19_DYN	20220323	PS19	PS19_F3	ABs	DYN	F	57	0.0228	5.1472	1470	24.5	0.181881		0.392444	0.116429	0.110382	0.0103406	0.0427976	0.0158869			0.0592752	0.0115661	0.0649849		0.13375	0.341007	0.0203719	0.0918454	0.0308609	0.236055	0.0827617
20220323_PS19_DYN	20220323	PS19	PS19_F3	ABs	DYN	F	57	0.0228	5.1472	1500	25	0.0937029		0.192031	0.200002	0.030205	0.138714	0.0703864	0.0252832			0.0279702	0.0585511	0.175916		0.136889	0.426173	0.0279659	0.118131	-0.0118629	-0.0292446	0.0914804
20220323_PS19_DYN	20220323	PS19	PS19_F3	ABs	DYN	F	57	0.0228	5.1472	1530	25.5	0.18942		0.124576	0.185331	0.0928217	0.0160862	0.122585	0.0738954			0.0277118	0.0704932	0.199566		0.176286	0.467924	-0.0065407	0.105916	0.0865199	-0.0364761	0.128237
20220323_PS19_DYN	20220323	PS19	PS19_F3	ABs	DYN	F	57	0.0228	5.1472	1560	26	0.0912726		0.40931	0.11502	0.213428	0.16651	0.178769	0.140091			-0.00338618	0.0208893	0.229955		0.191907	0.287746	0.0260595	0.0116829	-0.0583508	0.0657825	0.113192
20220323_PS19_DYN	20220323	PS19	PS19_F3	ABs	DYN	F	57	0.0228	5.1472	1590	26.5	0.202412		0.257387	0.187492	0.073774	0.0802804	0.00444781	0.049576			0.0581474	0.132164	0.0829645		0.171661	0.447201	0.0978275	0.00864868	-0.0202279	0.176021	0.102932
20220323_PS19_DYN	20220323	PS19	PS19_F3	ABs	DYN	F	57	0.0228	5.1472	1620	27	0.156843		0.133706	0.119283	0.0466456	-0.142173	0.0663204	0.026039			0.0391193	0.30209	0.195956		0.167085	0.54959	0.0958983	-0.0328621	0.0822664	0.117232	0.0949994
20220323_PS19_DYN	20220323	PS19	PS19_F3	ABs	DYN	F	57	0.0228	5.1472	1650	27.5	0.050981		0.190236	0.153471	0.121726	0.04398	0.0201535	0.0410332			0.115786	0.133363	0.0646393		0.198378	0.405558	0.00680825	0.0898711	-0.0357597	0.0245757	0.102751
20220323_PS19_DYN	20220323	PS19	PS19_F3	ABs	DYN	F	57	0.0228	5.1472	1680	28	0.10402		0.199997	0.203802	0.0964513	-0.0802712	0.0127983	0.0460959			0.142004	0.0290653	-0.0522032		0.19538	0.455704	0.0435638	0.000380877	0.00594184	0.0291135	0.115263
20220323_PS19_DYN	20220323	PS19	PS19_F3	ABs	DYN	F	57	0.0228	5.1472	1710	28.5	0.0576389		0.207274	0.113797	0.107294	0.341912	0.0227128	0.0339715			0.0648652	0.09833	0.00202895		0.176522	0.402808	0.0557473	0.0786506	-0.0408719	-0.0459545	0.10038
20220323_PS19_DYN	20220323	PS19	PS19_F3	ABs	DYN	F	57	0.0228	5.1472	1740	29	0.0669833		0.253525	0.234053	0.134932	-0.059894	0.0444952	0.0177048			0.0514573	0.194112	0.0351242		0.158975	0.353698	0.139328	-0.0122074	0.034935	0.0266716	0.108677
20220323_PS19_DYN	20220323	PS19	PS19_F3	ABs	DYN	F	57	0.0228	5.1472	1770	29.5	0.149019		0.170976	0.197498	0.128508	-0.0345403	0.0752603	0.112494			0.0625071	0.0548355	0.0905782		0.220336	0.313606	-0.0302921	-0.0346317	0.121705	0.0234436	0.12021
20220323_WT_DYN	20220323	WT	WT_RR	ABs	DYN	F	74.1429	0.0308	4.74299	0	0	-0.0134179		0.00323239	0.0188548	-0.013399	-0.0112874	-0.00600238	0.0392324	-0.0176669	-0.0176669	0.00175074	-0.0137375	-0.0176669	-0.0176669	0.00454678	0.0300892	0.000928058	0.0104028	-0.00424362	-0.01095	0
20220323_WT_DYN	20220323	WT	WT_RR	ABs	DYN	F	74.1429	0.0308	4.74299	30	0.5	0.0282441		0.0213002	0.0228981	0.00873607	-0.00888176	0.0340454	-0.000891169	-0.0172002	-0.0157924	0.00528731	0.1146	0.0744756	0.0157584	0.0209643	0.0248327	0.0300003	0.0274103	0.0242104	0.034342	0.0229198
20220323_WT_DYN	20220323	WT	WT_RR	ABs	DYN	F	74.1429	0.0308	4.74299	60	1	0.00631134		0.0216103	0.0245431	0.0253335	-0.000970117	-0.00474638	0.0163358	-0.0171481	-0.000594844	-0.00318278	0.094482	0.00785197	-0.00995408	0.0246491	0.0488389	0.000901195	0.0202634	0.052751	0.0372965	0.0194973
20220323_WT_DYN	20220323	WT	WT_RR	ABs	DYN	F	74.1429	0.0308	4.74299	90	1.5	0.010132		0.0602425	0.0350963	0.0100499	0.0237488	0.00225406	0.020465	-0.0159868	-0.0175123	0.0313443	0.150881	0.00880647	0.0808569	0.0227498	0.00576061	0.0275781	0.00805074	0.0345836	0.0105689	0.024741
20220323_WT_DYN	20220323	WT	WT_RR	ABs	DYN	F	74.1429	0.0308	4.74299	120	2	0.0157369		0.101056	0.0123866	0.013184	0.0127576	-0.0133599	0.0239739	-0.0172406	-0.0155405	0.0190436	0.147914	0.0268109	0.0250918	0.0157853	0.0440294	0.052132	0.0621112	0.0215622	0.0934333	0.0233493
20220323_WT_DYN	20220323	WT	WT_RR	ABs	DYN	F	74.1429	0.0308	4.74299	150	2.5	0.0426057		0.0554047	0.0508632	0.017007	0.105525	0.0266567	0.0587943	-0.0113769	-0.0138748	0.0234545	0.0300314	0.0443966	0.0579179	0.0420965	0.0871561	0.0723361	0.161127	0.00708088	0.075943	0.0410048
20220323_WT_DYN	20220323	WT	WT_RR	ABs	DYN	F	74.1429	0.0308	4.74299	180	3	0.028412		0.0741434	0.0178776	0.0343817	0.0132041	0.0416631	0.00804789	0.316352	0.0392558	0.0531417	0.0441223	0.0357387	0.0622978	0.0441698	0.05593	0.0247663	0.022142	0.0479686	0.0394497	0.0351805
20220323_WT_DYN	20220323	WT	WT_RR	ABs	DYN	F	74.1429	0.0308	4.74299	210	3.5	0.0149251		0.0380815	0.0417898	0.0440302	0.0163323	0.0292826	0.0456406	-0.0154738	0.0633769	0.0404331	0.148777	0.0178927	-0.00517156	0.0368444	0.0822762	0.0473529	0.00883286	0.0279144	0.0855182	0.0416449
20220323_WT_DYN	20220323	WT	WT_RR	ABs	DYN	F	74.1429	0.0308	4.74299	240	4	0.046268		0.0971659	0.0264183	0.0424418	0.0251894	0.0266066	0.0988099	0.0447325	0.0134906	0.0702091	0.0778523	0.0243012	0.0390943	0.0417386	0.0332069	0.021143	0.111616	0.023374	0.0831053	0.0390264
20220323_WT_DYN	20220323	WT	WT_RR	ABs	DYN	F	74.1429	0.0308	4.74299	270	4.5	0.0666657		0.106295	0.037219	0.0221575	-0.00473195	0.0550746	0.0706771	0.0153916	0.00322345	0.0919809	0.0623189	-0.00740035	0.177953	0.0537699	0.120698	0.0683021	0.0375919	0.130005	0.165703	0.0635604
20220323_WT_DYN	20220323	WT	WT_RR	ABs	DYN	F	74.1429	0.0308	4.74299	300	5	0.119341		0.0686861	0.0497937	0.110927	0.0162554	0.0585022	0.0484838	0.0206784	0.476292	0.0808829	0.0766425	0.0312184	0.0750198	0.0615334	0.188171	0.0508776	0.0334832	0.0711541	0.127205	0.0684389
20220323_WT_DYN	20220323	WT	WT_RR	ABs	DYN	F	74.1429	0.0308	4.74299	330	5.5	0.0661796		0.118463	0.0414329	0.047077	0.00309901	0.0559404	0.0485185	0.0147214	0.0416457	0.0690829	0.0937787	0.0568167	0.0754738	0.0643005	0.0852838	0.116341	0.0394536	0.0743441	0.0774504	0.0569174
20220323_WT_DYN	20220323	WT	WT_RR	ABs	DYN	F	74.1429	0.0308	4.74299	360	6	0.0698784		0.111794	0.0760564	0.0557003	0.006007	0.0535245	0.0614527	-0.00628473	0.0854322	0.0564701	0.0751719	0.0376126	0.0799962	0.07715	0.0742134	0.0516992	0.0312647	0.0334477	0.0588909	0.0586015
20220323_WT_DYN	20220323	WT	WT_RR	ABs	DYN	F	74.1429	0.0308	4.74299	390	6.5	0.117144		0.130054	0.0841344	0.0609034	0.145791	0.0772339	0.0349765	0.0166853	0.143836	0.0398628	0.088158	0.10474	0.0180585	0.0726471	0.134254	0.114036	0.114219	0.0802918	0.103273	0.0766116
20220323_WT_DYN	20220323	WT	WT_RR	ABs	DYN	F	74.1429	0.0308	4.74299	420	7	0.245164		0.0713708	0.07499	0.0677206	0.0285302	0.0777328	0.123916	0.038585	0.17604	0.133316	0.140176	0.119625	0.155342	0.114029	0.197196	0.0708428	0.0493741	0.0794216	0.133435	0.0963066
20220323_WT_DYN	20220323	WT	WT_RR	ABs	DYN	F	74.1429	0.0308	4.74299	450	7.5	0.0968382		0.187073	0.0745441	0.0462876	0.0875412	0.0543785	0.11084	0.0186484	0.0293643	0.0872676	0.184709	0.0772476	0.136259	0.117609	0.206331	0.0699247	0.0278726	0.0633995	0.0845508	0.0887495
20220323_WT_DYN	20220323	WT	WT_RR	ABs	DYN	F	74.1429	0.0308	4.74299	480	8	0.122244		0.104876	0.139715	0.0878354	0.056206	0.0235616	0.0887576	0.071495	-0.0141153	0.0720254	0.104666	0.0554397	0.105403	0.10447	0.164508	0.184166	0.0647503	0.0993929	0.114495	0.100054
20220323_WT_DYN	20220323	WT	WT_RR	ABs	DYN	F	74.1429	0.0308	4.74299	510	8.5	0.103016		0.134435	0.110821	0.0732778	0.216897	0.0948297	0.100202	0.00102269	0.0210122	0.101318	0.245472	0.167439	0.142233	0.110436	0.226701	0.10955	0.134142	0.0835196	0.096034	0.103257
20220323_WT_DYN	20220323	WT	WT_RR	ABs	DYN	F	74.1429	0.0308	4.74299	540	9	0.117238		0.0917797	0.147356	0.127034	0.0709696	0.104294	0.0959937	0.00453989	0.217259	0.09986	0.164106	0.155373	0.0150466	0.13051	0.226146	0.123454	0.103338	0.0810092	0.128924	0.115732
20220323_WT_DYN	20220323	WT	WT_RR	ABs	DYN	F	74.1429	0.0308	4.74299	570	9.5	0.204049		0.153361	0.108096	0.135581	0.06626	0.162029	0.139021	0.418971	0.0874992	0.109832	0.225609	0.11194	0.090497	0.146792	0.260706	0.100911	0.139225	0.17261	0.0592576	0.128384
20220323_WT_DYN	20220323	WT	WT_RR	ABs	DYN	F	74.1429	0.0308	4.74299	600	10	0.177995		0.207924	0.156144	0.145288	0.0785192	0.101765	0.108795	0.166237	0.258604	0.160511	0.225922	0.0701014	0.154401	0.171022	0.187778	0.0899816	0.0473105	0.129905	0.153672	0.130653
20220323_WT_DYN	20220323	WT	WT_RR	ABs	DYN	F	74.1429	0.0308	4.74299	630	10.5	0.240278		0.103669	0.188462	0.13436	0.167144	0.153596	0.207612	0.110513	0.127788	0.152548	0.12547	0.155581	0.279732	0.164437	0.23084	0.112649	0.126421	0.141871	0.123554	0.154165
20220323_WT_DYN	20220323	WT	WT_RR	ABs	DYN	F	74.1429	0.0308	4.74299	660	11	0.293219		0.268876	0.157643	0.184314	0.280557	0.16088	0.118893	0.163864	0.2284	0.134415	0.268535	0.209862	0.27932	0.178701	0.32245	0.228972	0.149506	0.189584	0.164285	0.168026
20220323_WT_DYN	20220323	WT	WT_RR	ABs	DYN	F	74.1429	0.0308	4.74299	690	11.5	0.326024		0.193579	0.123182	0.211325	0.0861394	0.134746	0.103886	0.441471	0.328011	0.151121	0.280581	0.119804	0.187604	0.191571	0.297275	0.139934	0.0883493	0.191208	0.127016	0.157055
20220323_WT_DYN	20220323	WT	WT_RR	ABs	DYN	F	74.1429	0.0308	4.74299	720	12	0.305986		0.210357	0.179403	0.195956	0.180385	0.173203	0.147393	0.0676339	0.0308729	0.194462	0.242047	0.221613	0.327004	0.190716	0.249856	0.166899	0.167153	0.130743	0.155366	0.169236
20220323_WT_DYN	20220323	WT	WT_RR	ABs	DYN	F	74.1429	0.0308	4.74299	750	12.5	0.211971		0.156107	0.156273	0.1416	0.288317	0.173785	0.264312	0.130706	0.098573	0.181254	0.334176	0.195983	0.137151	0.233456	0.312241	0.204005	0.257174	0.193485	0.136021	0.180332
20220323_WT_DYN	20220323	WT	WT_RR	ABs	DYN	F	74.1429	0.0308	4.74299	780	13	0.17675		0.267446	0.235044	0.149802	0.144416	0.174158	0.141611	0.124574	0.0723919	0.224591	0.258183	0.277227	0.0765835	0.250444	0.326243	0.191883	0.260481	0.141735	0.131601	0.191515
20220323_WT_DYN	20220323	WT	WT_RR	ABs	DYN	F	74.1429	0.0308	4.74299	810	13.5	0.213205		0.174614	0.197835	0.117901	0.342767	0.210307	0.194526	0.0837281	0.0760274	0.205209	0.152905	0.317417	0.0387289	0.200251	0.42088	0.143005	0.272248	0.176977	0.154499	0.19119
20220323_WT_DYN	20220323	WT	WT_RR	ABs	DYN	F	74.1429	0.0308	4.74299	840	14	0.375201		0.234977	0.190547	0.208787	0.174101	0.22726	0.181145	0.160056	0.460283	0.225484	0.282141	0.21435	0.246697	0.245426	0.413831	0.205634	0.278153	0.163824	0.370832	0.226504
20220323_WT_DYN	20220323	WT	WT_RR	ABs	DYN	F	74.1429	0.0308	4.74299	870	14.5	0.264562		0.345236	0.182408	0.184723	0.169726	0.171525	0.145716	0.105715	0.161954	0.216874	0.272187	0.236671	0.127853	0.254094	0.340696	0.183123	0.256393	0.140266	0.120401	0.184286
20220323_WT_DYN	20220323	WT	WT_RR	ABs	DYN	F	74.1429	0.0308	4.74299	900	15	0.355636		0.293941	0.214081	0.259338	0.167311	0.245913	0.229543	0.0397361	0.288949	0.20807	0.299306	0.363082	0.430638	0.256013	0.348305	0.23654	0.305905	0.179073	0.250855	0.235458
20220323_WT_DYN	20220323	WT	WT_RR	ABs	DYN	F	74.1429	0.0308	4.74299	930	15.5	0.315939		0.241965	0.296613	0.164456	0.225906	0.237841	0.183214	0.115735	0.160723	0.210514	0.349247	0.514709	0.125943	0.260455	0.416036	0.195158	0.151379	0.160391	0.145216	0.225149
20220323_WT_DYN	20220323	WT	WT_RR	ABs	DYN	F	74.1429	0.0308	4.74299	960	16	0.222708		0.246346	0.258524	0.159109	0.290672	0.197559	0.256488	0.104746	0.262956	0.194044	0.259899	0.278487	0.260102	0.283375	0.350004	0.232481	0.269593	0.149573	0.233437	0.208033
20220323_WT_DYN	20220323	WT	WT_RR	ABs	DYN	F	74.1429	0.0308	4.74299	990	16.5	0.320084		0.219296	0.262203	0.227239	0.440111	0.271538	0.162532	0.156146	0.208322	0.19811	0.228543	0.294996	0.382188	0.288094	0.418045	0.193938	0.300461	0.140978	0.271176	0.228173
20220323_WT_DYN	20220323	WT	WT_RR	ABs	DYN	F	74.1429	0.0308	4.74299	1020	17	0.221075		0.336593	0.230181	0.23081	0.218357	0.244382	0.248521	0.123878	0.179058	0.18835	0.311644	0.259791	0.0554051	0.277353	0.378525	0.27186	0.32795	0.190533	0.29892	0.2301
20220323_WT_DYN	20220323	WT	WT_RR	ABs	DYN	F	74.1429	0.0308	4.74299	1050	17.5	0.296509		0.223682	0.220113	0.161543	0.140695	0.264363	0.288183	0.251773	0.112271	0.247326	0.30801	0.321416	0.325971	0.254734	0.400153	0.144775	0.334963	0.199336	0.240722	0.221032
20220323_WT_DYN	20220323	WT	WT_RR	ABs	DYN	F	74.1429	0.0308	4.74299	1080	18	0.177258		0.247641	0.220576	0.244734	0.182837	0.21339	0.223608	0.122083	0.331208	0.25201	0.362149	0.383225	0.101354	0.275362	0.437589	0.187323	0.237614	0.148078	0.194824	0.212627
20220323_WT_DYN	20220323	WT	WT_RR	ABs	DYN	F	74.1429	0.0308	4.74299	1110	18.5	0.366091		0.298455	0.277668	0.264355	0.154501	0.236561	0.202266	0.176588	0.0701298	0.203989	0.482784	0.336774	0.212794	0.285035	0.304984	0.268485	0.136085	0.161916	0.202212	0.233176
20220323_WT_DYN	20220323	WT	WT_RR	ABs	DYN	F	74.1429	0.0308	4.74299	1140	19	0.370115		0.270034	0.257521	0.155623	0.195811	0.247516	0.207951	0.0985699	0.154799	0.182627	0.419067	0.276524	0.246494	0.25644	0.410539	0.295795	0.21884	0.183348	0.244645	0.219606
20220323_WT_DYN	20220323	WT	WT_RR	ABs	DYN	F	74.1429	0.0308	4.74299	1170	19.5	0.279043		0.205926	0.274212	0.199602	0.141295	0.210811	0.192824	0.229552	0.0612178	0.158137	0.468268	0.303734	0.469567	0.277827	0.512518	0.228569	0.232671	0.232262	0.185731	0.221008
20220323_WT_DYN	20220323	WT	WT_RR	ABs	DYN	F	74.1429	0.0308	4.74299	1200	20	0.328789		0.235031	0.213494	0.188422	0.224497	0.272383	0.242459	0.12327	0.235956	0.266448	0.32606	0.246221	0.131441	0.26587	0.327668	0.383844	0.337694	0.26763	0.246909	0.237169
20220323_WT_DYN	20220323	WT	WT_RR	ABs	DYN	F	74.1429	0.0308	4.74299	1230	20.5	0.247054		0.283015	0.249367	0.174925	0.288227	0.247997	0.21624	0.0844692	0.155639	0.225899	0.360723	0.423524	0.117214	0.299113	0.404119	0.167019	0.366904	0.206139	0.287682	0.235063
20220323_WT_DYN	20220323	WT	WT_RR	ABs	DYN	F	74.1429	0.0308	4.74299	1260	21	0.316513		0.366956	0.222628	0.175229	0.197703	0.351959	0.197217	0.0991449	0.253782	0.218826	0.326737	0.320771	0.214835	0.304111	0.531056	0.227317	0.191862	0.172998	0.215166	0.241384
20220323_WT_DYN	20220323	WT	WT_RR	ABs	DYN	F	74.1429	0.0308	4.74299	1290	21.5	0.283656		0.384818	0.323775	0.203474	0.324001	0.320995	0.223334	0.109241	0.0863365	0.201759	0.346861	0.279624	0.160429	0.28755	0.517078	0.342329	0.157934	0.200299	0.291664	0.254325
20220323_WT_DYN	20220323	WT	WT_RR	ABs	DYN	F	74.1429	0.0308	4.74299	1320	22	0.234009		0.392435	0.294188	0.187635	0.158717	0.241659	0.224281	0.129074	0.0397582	0.233953	0.333183	0.194873	0.281793	0.250864	0.34758	0.161377	0.203617	0.206276	0.248682	0.220613
20220323_WT_DYN	20220323	WT	WT_RR	ABs	DYN	F	74.1429	0.0308	4.74299	1350	22.5	0.390308		0.351198	0.27108	0.190055	0.242503	0.2734	0.249149	0.18734	0.0946291	0.282383	0.37652	0.395114	0.2654	0.295455	0.369335	0.132944	0.227371	0.177112	0.202657	0.224015
20220323_WT_DYN	20220323	WT	WT_RR	ABs	DYN	F	74.1429	0.0308	4.74299	1380	23	0.198809		0.225682	0.275052	0.188895	0.22589	0.27012	0.204651	0.177179	0.205483	0.210324	0.501296	0.274689	0.242199	0.304668	0.41691	0.210128	0.223018	0.21668	0.207827	0.237097
20220323_WT_DYN	20220323	WT	WT_RR	ABs	DYN	F	74.1429	0.0308	4.74299	1410	23.5	0.33048		0.229821	0.287324	0.204757	0.0941245	0.281739	0.320457	0.150242	0.276889	0.228812	0.202032	0.198462	0.176371	0.292987	0.38738	0.172939	0.181163	0.162228	0.260844	0.212852
20220323_WT_DYN	20220323	WT	WT_RR	ABs	DYN	F	74.1429	0.0308	4.74299	1440	24	0.332005		0.327007	0.296209	0.205821	0.227124	0.334423	0.240717	0.183654	0.231181	0.281078	0.279874	0.332299	0.237828	0.300636	0.369019	0.229882	0.155289	0.1831	0.274033	0.248325
20220323_WT_DYN	20220323	WT	WT_RR	ABs	DYN	F	74.1429	0.0308	4.74299	1470	24.5	0.333979		0.215732	0.386429	0.270026	0.259214	0.214624	0.317412	0.259516	0.279822	0.28088	0.258667	0.229562	0.27535	0.338346	0.426037	0.257006	0.292016	0.22655	0.172252	0.281147
20220323_WT_DYN	20220323	WT	WT_RR	ABs	DYN	F	74.1429	0.0308	4.74299	1500	25	0.305179		0.192499	0.225554	0.294057	0.144984	0.28333	0.247085	0.0943619	0.220147	0.200345	0.290201	0.192926	0.080926	0.292585	0.288239	0.263467	0.257926	0.1903	0.151929	0.225581
20220323_WT_DYN	20220323	WT	WT_RR	ABs	DYN	F	74.1429	0.0308	4.74299	1530	25.5	0.294983		0.24104	0.266404	0.226082	0.192456	0.238878	0.307516	0.45062	0.224059	0.215946	0.503118	0.224342	0.119612	0.305564	0.367401	0.173841	0.23633	0.216591	0.3333	0.233337
20220323_WT_DYN	20220323	WT	WT_RR	ABs	DYN	F	74.1429	0.0308	4.74299	1560	26	0.286418		0.289606	0.265882	0.176651	0.399847	0.320524	0.258009	0.095393	0.248928	0.222043	0.266667	0.351335	0.224636	0.290308	0.315897	0.30353	0.261857	0.240135	0.337141	0.253264
20220323_WT_DYN	20220323	WT	WT_RR	ABs	DYN	F	74.1429	0.0308	4.74299	1590	26.5	0.373891		0.214025	0.284963	0.197671	0.167731	0.179422	0.269523	0.077886	0.242263	0.217248	0.339441	0.38604	0.16466	0.304844	0.330015	0.175338	0.248448	0.154121	0.173117	0.200353
20220323_WT_DYN	20220323	WT	WT_RR	ABs	DYN	F	74.1429	0.0308	4.74299	1620	27	0.2162		0.31678	0.262387	0.156978	0.184555	0.293098	0.281944	0.233992	0.117294	0.185754	0.333195	0.312488	0.128603	0.295002	0.409429	0.171627	0.348949	0.146935	0.185525	0.221291
20220323_WT_DYN	20220323	WT	WT_RR	ABs	DYN	F	74.1429	0.0308	4.74299	1650	27.5	0.33394		0.276741	0.255898	0.25875	0.203938	0.270439	0.296709	0.198597	0.333332	0.201412	0.42116	0.336595	0.0374038	0.310941	0.269452	0.124284	0.289732	0.104362	0.256458	0.223074
20220323_WT_DYN	20220323	WT	WT_RR	ABs	DYN	F	74.1429	0.0308	4.74299	1680	28	0.288547		0.269578	0.254058	0.187174	0.208523	0.207015	0.24002	0.0513623	0.0331473	0.155563	0.467792	0.328609	0.0445766	0.271073	0.328715	0.136379	0.298409	0.0759406	0.267003	0.193502
20220323_WT_DYN	20220323	WT	WT_RR	ABs	DYN	F	74.1429	0.0308	4.74299	1710	28.5	0.273724		0.238184	0.256248	0.292935	0.082596	0.174641	0.328068	0.230319	0.0657982	0.215573	0.346945	0.24376	0.186835	0.292066	0.560602	0.133303	0.196412	0.139776	0.351787	0.221546
20220323_WT_DYN	20220323	WT	WT_RR	ABs	DYN	F	74.1429	0.0308	4.74299	1740	29	0.205893		0.284746	0.221462	0.17346	0.134882	0.244203	0.314539	0.0191985	0.285208	0.14287	0.346378	0.317349	0.123581	0.278866	0.311125	0.173649	0.252473	0.141478	0.301997	0.19219
20220323_WT_DYN	20220323	WT	WT_RR	ABs	DYN	F	74.1429	0.0308	4.74299	1770	29.5	0.228416		0.381775	0.244483	0.226834	0.269408	0.235885	0.27197	0.0602813	0.185305	0.165288	0.401325	0.547765	0.0796933	0.3041	0.398824	0.211336	0.296235	0.164328	0.315131	0.227142

## Sheet: Static_pIDcc
Scan_ID	Date	Radiotracer	Strain	Mouse	Sex	Age (weeks)	Weight (kg)	Dose (MBq)	Scan	Amygdala	Anterior Commissure	Basal forebrain and septum	Brainstem	Caudate putamen	Central gray	Cerebellum	External capsule	Fimbria	Globus pallidus	Hippocampus	Hypothalamus	Inferior colliculi	Internal Capsule	Neocortex	Olfactory bulb	Rest of the midbrain	Superior colliculi	Thalamus	Ventricles	Whole Brain
20220216_PS19_8hr	20220216	TAUb	PS19	PS19_M1	M	58.4286	0.0222	2.99941	8hr	0.0717981	0.0494087	0.0808289	0.0659324	0.0414628	0.0318817	0.0524227	0.0409451	0.0241606	0.0317967	0.0403679	0.0712876	0.0574962	0.0280384	0.0766505	0.104844	0.0478988	0.0582968	0.0340006	0.0295941	0.0564844
20220216_WT_8hr	20220216	TAUb	WT	WT_L	M	58.4286	0.0459	3.2866	8hr	0.0647814	0.0636981	0.0767409	0.0475129	0.0408192	0.0266648	0.0462846	0.0336249	0.0291963	0.025971	0.0371725	0.0749734	0.0698098	0.0192162	0.0542417	0.0623451	0.0457901	0.0477614	0.0382295	0.0364919	0.0444563
20220216_PS19_12hr	20220216	TAUb	PS19	PS19_M1	M	58.4286	0.0222	0.710847	12hr	0.0579845	0.0791646	0.105688	0.0779816	0.0504284	0.0455405	0.0706162	0.0540338	0.0322318	0.0394879	0.0479952	0.107097	0.0895687	0.028	0.0793906	0.106119	0.044658	0.102067	0.04444	0.0334455	0.0602099
20220216_WT_12hr	20220216	TAUb	WT	WT_L	M	58.4286	0.0459	0.778909	12hr	0.0713372	0.0230769	0.0352967	0.0502957	0.0376501	0.0385409	0.0520808	0.0473818	0.0289715	0.0379783	0.0584412	0.0488563	0.0979941	0.0450753	0.0452127	0.0811261	0.0519826	0.0490508	0.0313049	0.0385256	0.0477976
20220217_PS19_8hr	20220217	TAUs	PS19	PS19_F1	F	52.1429	0.0262	5.17821	8hr	0.0681249	0.0302235	0.072067	0.0552268	0.0456301	0.0259641	0.0568758	0.0403252	0.0278982	0.0288142	0.0394457	0.0954137	0.0651811	0.0376384	0.0705362	0.0945594	0.033553	0.0482871	0.0286835	0.0389294	0.0484782
20220217_PS19_12hr	20220217	TAUs	PS19	PS19_F1	F	52.1429	0.0262	1.61006	12hr	0.071396	0.0605696	0.0664632	0.0637113	0.0460866	0.0474917	0.0686893	0.0613257	0.0312078	0.0262612	0.0555846	0.0697584	0.108992	0.0364528	0.0895512	0.0977545	0.0418059	0.0706783	0.0313255	0.0470999	0.0560167
20220217_WT_8hr	20220217	TAUs	WT	WT_R2	F	52.1429	0.0275	4.80066	8hr	0.0441783	0.0258399	0.0478596	0.0475043	0.0328041	0.0345275	0.0549988	0.0475891	0.0278157	0.0295547	0.0369851	0.0557276	0.0707323	0.0433569	0.0712766	0.0943782	0.0321579	0.0681219	0.0253377	0.0309403	0.0431482
20220217_WT_12hr	20220217	TAUs	WT	WT_R2	F	52.1429	0.0275	1.49267	12hr	0.0432825	0.0166977	0.0323605	0.0498044	0.0394546	0.0150874	0.0601634	0.053234	0.0156189	0.0317408	0.0445618	0.072793	0.0352828	0.0285574	0.0717455	0.0899894	0.0300964	0.0544968	0.024488	0.0283483	0.0470165
20220225_PS19_8hr	20220225	TAUs	PS19	PS19_F2	F	63.8571	0.0233	3.70268	8hr	0.0461558	0.0625606	0.0696145	0.0468037	0.0430336	0.0266525	0.052165	0.0482294	0.038105	0.0370949	0.0370972	0.0440686	0.0850003	0.0332288	0.0698233	0.087689	0.0301273	0.0470388	0.0231008	0.0365409	0.0506438
20220225_WT_8hr	20220225	TAUs	WT	WT_R2	F	53.2857	0.0263	3.21923	8hr	0.0886518	0.0377473	0.0808252	0.0848994	0.0468052	0.0288955	0.0549606	0.0418304	0.0230943	0.0559571	0.048179	0.122569	0.0562841	0.0348358	0.0712572	0.0864013	0.041865	0.036044	0.0307042	0.0464078	0.0555133
20220225_PS19_12hr	20220225	TAUs	PS19	PS19_F2	F	63.8571	0.0233	1.01468	12hr	0.0755141	0.11913	0.0660533	0.0645308	0.0469723	0.0383102	0.0569669	0.0388005	0.0271985	0.0316629	0.0532536	0.0454592	0.0462772	0.0422241	0.0637821	0.102	0.0350332	0.0573991	0.0360534	0.0409371	0.0527897
20220225_WT_12hr	20220225	TAUs	WT	WT_R2	F	53.2857	0.0263	0.882208	12hr	0.0770453	0.157386	0.0963278	0.0845908	0.0656753	0.0193912	0.0538549	0.0489785	0.0319471	0.0381651	0.0628803	0.0835624	0.0527954	0.0621927	0.0854475	0.0887561	0.0565072	0.0428275	0.0400788	0.0628099	0.0638783
20220302_PS19_8hr	20220302	TAUs	PS19	PS19_M1	M	60.4286	0.0207	2.79036	8hr	0.13127	0.131315	0.116012	0.116056	0.0697409	0.079339	0.0768016	0.0806482	0.0551187	0.0772208	0.0675973	0.125579	0.125921	0.069275	0.115624	0.152231	0.0631945	0.10701	0.0509836	0.0560807	0.0876987
20220302_WT_8hr	20220302	TAUs	WT	WT_LR	M	60.4286	0.0483	3.41069	8hr	0.0481733	0.0265317	0.0498767	0.0446423	0.0335326	0.0550945	0.0552616	0.0566858	0.0327324	0.0199525	0.0424206	0.0494493	0.111024	0.0363758	0.0644649	0.0739058	0.030001	0.072667	0.0321219	0.0362403	0.0470063
20220302_PS19_12hr	20220302	TAUs	PS19	PS19_M1	M	60.4286	0.0207	0.759858	12hr	0.0960657	0.0597062	0.0624794	0.107445	0.05172	0.0706864	0.086367	0.0831731	0.0633082	0.0870485	0.0796124	0.104162	0.0957126	0.0527409	0.12257	0.137015	0.0578744	0.101274	0.0632181	0.0665702	0.0853486
20220302_WT_12hr	20220302	TAUs	WT	WT_LR	M	60.4286	0.0483	0.928781	12hr	0.0665475	0.0104643	0.0796042	0.0527471	0.0473329	0.033509	0.0442557	0.057147	0.0333971	0.0400446	0.0486222	0.0529304	0.0652241	0.0189985	0.0744582	0.08583	0.0296723	0.0325905	0.0338644	0.054109	0.051667
20220303_PS19_12hr	20220303	TAUb	PS19	PS19_F1	F	54.1429	0.026	0.852705	12hr	0.0688416	0.00915985	0.0424964	0.0574558	0.0460381	0.0767797	0.116682	0.0884332	0.0278397	0.0458019	0.082937	0.0806118	0.176024	0.0262452	0.115165	0.128516	0.048102	0.133225	0.0352677	0.0399521	0.0793241
20220303_PS19_8hr	20220303	TAUb	PS19	PS19_F1	F	54.1429	0.026	3.11161	8hr	0.0796614	0.0613823	0.0951198	0.0728311	0.0440208	0.0407838	0.0749643	0.0524828	0.0245533	0.0349905	0.0551176	0.123391	0.0817847	0.0450632	0.101403	0.111001	0.0460705	0.0684559	0.0330116	0.0459727	0.0657692
20220303_WT_8hr	20220303	TAUb	WT	WT_R1	F	71.2857	0.0268	3.22856	8hr	0.0979613	0.10131	0.114571	0.0766003	0.071537	0.0876598	0.0901944	0.0920197	0.048047	0.0448512	0.0739662	0.113383	0.162229	0.0384536	0.127236	0.122729	0.0489169	0.113828	0.0486871	0.0640582	0.0854478
20220303_WT_12hr	20220303	TAUb	WT	WT_R1	F	71.2857	0.0268	0.884755	12hr	0.0956467	0.12491	0.116868	0.0648524	0.0854219	0.0568619	0.108469	0.0891329	0.0814756	0.0819163	0.0691684	0.0687661	0.187498	0.0319783	0.134171	0.138253	0.0719223	0.0969406	0.0457753	0.0653421	0.0932836
20220304_WT_8hr	20220304	TAUs	WT	WT_RR	F	71.4286	0.0317	2.2679	8hr	0.0433881	0.0278249	0.0349445	0.0390231	0.0339286	0.02594	0.0471085	0.0476688	0.0315572	0.0274089	0.0434368	0.0456668	0.0759712	0.022378	0.0725463	0.0952327	0.0395594	0.0426098	0.0321545	0.0343157	0.0514305
20220304_WT_12hr	20220304	TAUs	WT	WT_RR	F	71.4286	0.0317	0.727776	12hr	0.040141	0.0430436	0.0430093	0.040653	0.0362021	0.0544113	0.0577614	0.0670411	0.0310129	0.026742	0.0483407	0.0513962	0.0782133	0.0375952	0.0811888	0.102562	0.0348679	0.0827366	0.0277791	0.0332595	0.0525438
20220310_PS19_12hr	20220310	TAUs	PS19	PS19_F3	F	55.1429	0.0227	1.33203	12hr	0.0308581	0.0458127	0.0499167	0.0330246	0.0328081	0.0280464	0.0314638	0.0276345	0.0110822	0.0207936	0.0239409	0.0524382	0.0387691	0.0210338	0.0409797	0.0519884	0.0204262	0.0256384	0.0234728	0.0270831	0.0300284
20220310_PS19_8hr	20220310	TAUs	PS19	PS19_F3	F	55.1429	0.0227	4.56326	8hr	0.0416423	0.0286189	0.0450581	0.0290177	0.0229291	0.012001	0.0244804	0.0202642	0.0157163	0.0139642	0.0180904	0.0413578	0.0257284	0.019411	0.0371749	0.0496391	0.0175738	0.0266029	0.0180607	0.0231495	0.0258812
20220316_WT_8hr	20220316	TAUs	WT	WT_R1	F	73.1429	0.0252	3.19369	8hr	0.0250437	0.00560727	0.0306099	0.0213424	0.0218213	0.0211264	0.0257422	0.0223674	0.0140691	0.0234796	0.0195114	0.0305741	0.0598743	0.0230521	0.0453878	0.0495107	0.0141905	0.0445821	0.014795	0.0155697	0.0250671
20220316_WT_12hr	20220316	TAUs	WT	WT_R1	F	73.1429	0.0252	0.950073	12hr	0.0295195	0.0631583	0.0391292	0.0320132	0.0232632	0.0383791	0.0255157	0.0275409	0.00653119	0.020618	0.0284383	0.035042	0.0252585	0.0242298	0.0396228	0.0504558	0.0168573	0.0497726	0.00997371	0.029467	0.0284238
20220321_PS19_12hr	20220321	ABs	PS19	PS19_F1	F	56.7143	0.0265	0.713008	12hr	0.147789	0.221203	0.161709	0.117024	0.0887288	0.0795689	0.073246	0.0732138	0.0593549	0.0720543	0.0483275	0.146784	0.115982	0.0643216	0.14499	0.163628	0.0750658	0.0966731	0.0643289	0.0979597	0.120932
20220321_PS19_8hr	20220321	ABs	PS19	PS19_F1	F	56.7143	0.0265	2.48934	8hr	0.102749	0.0829115	0.104411	0.0906927	0.062909	0.0269047	0.102422	0.0671358	0.0380112	0.0560338	0.0726225	0.12556	0.0978336	0.0588748	0.115935	0.148375	0.0554163	0.0633086	0.0429557	0.0525691	0.0818622
20220321_WT_12hr	20220321	ABs	WT	WT_R2	F	56.7143	0.0262	0.649022	12hr	0.110983	0.143699	0.0966614	0.0647426	0.0783448	0.0707868	0.0600815	0.0550243	0.0724124	0.0668653	0.0398985	0.0897148	0.0775994	0.0461643	0.086014	0.138228	0.0542181	0.068173	0.0387115	0.0570923	0.066187
20220321_WT_8hr	20220321	ABs	WT	WT_R2	F	56.7143	0.0262	2.26594	8hr	0.0792516	0.0441815	0.0693408	0.0699816	0.0479581	0.0412663	0.0623372	0.0547595	0.0428419	0.0271816	0.0485531	0.0925959	0.0434739	0.0312011	0.078487	0.104097	0.0468066	0.0546112	0.0419598	0.0470286	0.0569426
20220323_PS19_12hr	20220323	ABs	PS19	PS19_F3	F	57	0.0228	0.567892	12hr	0.0997743	0.154462	0.0950489	0.0891973	0.0594207	0.0343266	0.110921	0.0829623	0.0395636	0.04991	0.0851751	0.103868	0.0616064	0.048463	0.128612	0.166587	0.0419531	0.0698264	0.0422214	0.0593421	0.083091
20220323_PS19_8hr	20220323	ABs	PS19	PS19_F3	F	57	0.0228	2.55241	8hr	0.0769375	0.105537	0.111715	0.0737857	0.0620492	0.0742545	0.101302	0.0946025	0.0378904	0.0365171	0.0620764	0.0890587	0.230227	0.0372845	0.161723	0.158001	0.0356646	0.117175	0.0388487	0.0599493	0.0804479
20220323_WT_12hr	20220323	ABs	WT	WT_RR	F	74.1429	0.0308	0.609433	12hr	0.0296143	0.0691945	0.0469855	0.0519088	0.0542097	0.0321238	0.0661658	0.0579208	0.0468118	0.0120996	0.0450667	0.0517989	0.127291	0.0435264	0.0857621	0.0863379	0.0336274	0.131303	0.0392662	0.0439246	0.0548944
20220323_WT_8hr	20220323	ABs	WT	WT_RR	F	74.1429	0.0308	2.73912	8hr	0.0483106	0.0303219	0.0533318	0.0454397	0.0346067	0.027326	0.0563118	0.0457096	0.0501538	0.0411469	0.0373966	0.0526962	0.0808239	0.0235719	0.0789599	0.0953871	0.0237894	0.0479746	0.0294908	0.0343384	0.049919

## Sheet: organ_biodistribution
Mean organ biodistribution at 2hr (%ID/g, n=3)						Mean organ biodistribution at 72hr (%ID/g, n=XX)
	[125I]6B2G12	[125I]TAUb	[125I]TAUs				[125I]6B2G12	[125I]6B2G12-Scfv8D3	[125I]scFv235-scfv8D3
Blood	0.27084	0.0572446	0.0568613			Blood	0.102017	0.00288605	0.00111829
Pellet	0.134558	0.0424065	0.0545381			Pellet	0.0298363	0.00387837	0.000599473
Plasma	0.490842	0.0734989	0.0605554			Lung	0.0192038	0.00113426	0.000642982
Urine	0.0242565	0.152138	0.361157			Liver	0.00296028	0.00186713	0.00163593
RH	0.000219785	0.0155938	0.00676182			Kidney	0.00785818	0.00150567	0.00566355
Brain	0.00018278	0.0157276	0.00675237			Spleen	0.0136763	0.0047044	0.00398621
Cer	0.000284223	0.0160756	0.00791636			Heart	0.0108802	0.00116139	0.000544174
Lung	0.0193834	0.0525609	0.021042			Muscle	0.00611298	0.000387797	0.000230502
Liver	0.00694773	0.195926	0.021338			Bone	0.00535741	0.00143289	0.00103208
Kidney	0.013263	0.0244958	0.0498047			Pancreas	0.0081082	0.000322979	0.000269172
Spleen	0.0223034	0.270302	0.139573			Skull	0.00696861	0.00116355	0.00120738
Heart	0.0202182	0.0102471	0.0109948			Thyroid	1.8272	1.76186	3.03557
Muscle	0.00611263	0.00291069	0.00697334			Plasma	0.161889	0.0015404	0.00302518
Bone	0.00638602	0.0467861	0.0370632			Urine	0.0290628	0.0042868	0.00458153
Pancreas	0.00420881	0.00574017	0.00969777			Brain	0.00113611	0.00127634	0.000209565
Skull	0.00598801	0.0153039	0.0149196
Mand. Gl.	0.0117471	0.0519128	0.102711
Thyroid	0.0554626	0.0960548	0.445018

## Sheet: fig3_pharmacokinetics_WT
Whole Brain (%ID/cc)	Column Labels
	ABs				TAUb				TAUs
	20220321		20220323		20220216		20220303		20220217		20220225		20220302		20220304	20220316	20220310
Time (min)	PS19_F1	WT_R2	PS19_F3	WT_RR	PS19_M1	WT_L	PS19_F1	WT_R1	PS19_F1	WT_R2	PS19_F2	WT_R2	PS19_M1	WT_LR	WT_RR	WT_R1	PS19_F3
0	0		0	0	0	0	0	0	0	0	0	0	0	0	0	0
0.5	0.00141577		-0.0180269	0.0229198	0.00350203	0.00390309	0.00451969	0.0105141	0.0130144	-0.0156238	0.0124975	-0.00429612	0.00553923	0.010692	0.0129868	0.0108566
1	0.00788917		0.0118794	0.0194973	-0.00107025	0.00400209	0.0120851	0.00494771	-0.000969553	0.0116209	0.0293295	-0.00544049	0.00121802	0.00729337	0.0201356	0.0272329
1.5	0.0137953		0.00784566	0.024741	0.014159	0.0129363	0.0178956	0.012309	-0.00770905	-0.00917833	0.0168703	0.00641798	-0.00183541	0.0115991	0.0454139	0.0292906
2	0.00695091		0.0222259	0.0233493	0.0254531	0.0158214	0.0340118	0.0214305	-0.00228024	-0.0186476	0.0217635	0.00889418	0.00684633	0.0169858	0.0184097	0.0269007
2.5	0.00761887		-0.00274956	0.0410048	0.0482151	0.02911	0.0339035	0.0169761	0.00758768	0.000887911	0.0263711	-2.43346e-06	0.00939222	0.0153585	0.0396941	0.0489691
3	0.00922857		0.0317279	0.0351805	0.0419175	0.0285906	0.0364224	0.0224115	0.011995	0.0103721	0.0266566	0.018568	0.0132702	0.0140123	0.0433082	0.0300657
3.5	0.0274586		0.0234628	0.0416449	0.0414893	0.0234166	0.0271392	0.0372206	-0.018028	0.000164378	0.0271025	0.0181708	0.0358914	0.0295343	0.0332344	0.0624642
4	0.0210296		0.00319412	0.0390264	0.0419335	0.0290813	0.0498251	0.0354759	0.0207361	0.00176307	0.0222585	0.0286785	0.0319352	0.0133318	0.0517353	0.0672785
4.5	0.0227755		0.0265353	0.0635604	0.0457881	0.0341982	0.0610585	0.033881	-0.00965462	0.0112859	0.0447276	0.0303452	0.0274275	0.024249	0.0536371	0.0683806
5	0.0375697		-0.000979035	0.0684389	0.0408835	0.0394011	0.0607905	0.0535229	0.00907849	0.0129108	0.0417858	0.027363	0.0383887	0.026369	0.0610577	0.0574302
5.5	0.0522176		0.029669	0.0569174	0.0384241	0.0399344	0.0785323	0.0366616	0.00246432	0.00291828	0.0544003	0.0421846	0.0552271	0.0363749	0.0748707	0.0659138
6	0.0277302		0.0390925	0.0586015	0.0697779	0.0417692	0.0793491	0.0573882	-0.00355972	0.0150917	0.0690113	0.040083	0.0683804	0.0438502	0.0826844	0.0537366
6.5	0.0249819		0.0370613	0.0766116	0.0614428	0.044689	0.0811063	0.0631788	0.0220457	0.00183355	0.067463	0.022007	0.07716	0.0298829	0.0701805	0.0653763
7	0.0527671		0.0361709	0.0963066	0.0681765	0.0489642	0.0964914	0.0662231	0.0160098	0.0115303	0.0788192	0.0400446	0.0778986	0.0441278	0.0897771	0.0587677
7.5	0.056813		0.0444936	0.0887495	0.0787294	0.0622852	0.111764	0.0642101	0.00838328	0.00471504	0.0799524	0.0520385	0.0738365	0.0436014	0.0918522	0.0573484
8	0.0665793		0.0565266	0.100054	0.0862061	0.0621633	0.109266	0.0690563	0.0135916	0.0133757	0.116102	0.0610064	0.100902	0.0393328	0.114551	0.0654751
8.5	0.0642592		0.0265045	0.103257	0.0968062	0.0622273	0.109948	0.0855524	0.00506618	-0.0115872	0.101737	0.0561335	0.0853724	0.0399518	0.0891861	0.0683873
9	0.0520686		0.0578359	0.115732	0.0911963	0.0680307	0.120204	0.0707963	-0.00489347	0.0303664	0.116034	0.064214	0.110915	0.049578	0.113196	0.0528919
9.5	0.0737979		0.0515891	0.128384	0.0959987	0.0714049	0.115111	0.0987766	0.0231618	0.00796477	0.11596	0.0469708	0.110965	0.0563591	0.112938	0.0502312
10	0.0917031		0.0522514	0.130653	0.0905237	0.0723737	0.137428	0.106752	0.00408744	0.00817776	0.115194	0.0470068	0.172461	0.0687925	0.121873	0.0567034
10.5	0.100044		0.0669437	0.154165	0.127215	0.10173	0.129741	0.106818	0.00908423	-0.00539763	0.123793	0.0660237	0.11808	0.0616471	0.144493	0.0525544
11	0.104815		0.059246	0.168026	0.131516	0.0850403	0.128617	0.121735	0.0115428	-0.00202633	0.120512	0.0663723	0.152452	0.055259	0.129509	0.0602759
11.5	0.0969829		0.0585524	0.157055	0.135515	0.0844045	0.14944	0.121681	0.00437796	0.0157043	0.12557	0.0843305	0.158525	0.0639525	0.119406	0.0359162
12	0.130879		0.0548979	0.169236	0.167367	0.0945904	0.151825	0.117452	-0.0102925	0.0242714	0.12735	0.0685158	0.183432	0.0560221	0.169699	0.0503662
12.5	0.116347		0.0667486	0.180332	0.113581	0.0944551	0.172088	0.136338	0.0174674	-0.000763021	0.153083	0.0799103	0.209927	0.0673988	0.151681	0.0418746
13	0.128771		0.0354381	0.191515	0.150095	0.09671	0.163159	0.136576	0.0310939	0.0296031	0.134114	0.0625108	0.227102	0.0659898	0.138689	0.0416993
13.5	0.140568		0.0770862	0.19119	0.120078	0.0907309	0.171048	0.149839	-0.00536067	0.00436048	0.163761	0.0652285	0.205189	0.071163	0.137124	0.031242
14	0.1211		0.0373221	0.226504	0.154405	0.107969	0.171568	0.150876	0.0184479	0.0275675	0.164692	0.0750314	0.240359	0.0647295	0.183501	0.0345862
14.5	0.165422		0.0728559	0.184286	0.143417	0.0955091	0.173477	0.187166	0.0275782	0.0315659	0.144039	0.0808067	0.238599	0.0789064	0.172756	0.0216985
15	0.159709		0.0751575	0.235458	0.146505	0.0797184	0.180217	0.189564	0.0278455	0.0427966	0.168893	0.0713269	0.25582	0.0657935	0.170213	0.0230636
15.5	0.172862		0.0946506	0.225149	0.139676	0.0837138	0.151086	0.191173	0.0129343	0.0275645	0.163821	0.0659949	0.257978	0.0865304	0.189369	0.0332912
16	0.165132		0.080845	0.208033	0.136076	0.087827	0.170892	0.182606	0.0206831	0.00969489	0.164288	0.0813771	0.25444	0.0752387	0.183052	0.0295399
16.5	0.172094		0.0808399	0.228173	0.143871	0.0920084	0.185141	0.194896	0.0320008	0.0099995	0.174749	0.090031	0.306168	0.0826228	0.189637	0.0246297
17	0.205599		0.0936478	0.2301	0.109306	0.0794614	0.185798	0.221812	0.0500181	0.0172047	0.157435	0.0772108	0.305762	0.0688712	0.211617	0.028064
17.5	0.183161		0.0864019	0.221032	0.129129	0.0744789	0.190044	0.224169	0.0146396	0.0283611	0.154473	0.070845	0.338955	0.0731459	0.178933	0.0316172
18	0.195509		0.0740817	0.212627	0.115273	0.0803113	0.203749	0.248139	0.028514	0.0276264	0.149988	0.0776753	0.304678	0.0689601	0.202115	0.0257025
18.5	0.201462		0.123567	0.233176	0.116267	0.0854041	0.189665	0.260457	0.0312808	0.0190216	0.145942	0.0962021	0.317412	0.0723788	0.204403	0.04414
19	0.191056		0.108207	0.219606	0.103936	0.0729571	0.193794	0.28611	0.0230691	0.0355716	0.184572	0.0843004	0.341671	0.0733495	0.221141	0.0310204
19.5	0.208016		0.0790284	0.221008	0.112315	0.0786998	0.197348	0.270408	0.0269284	0.00294025	0.15112	0.0892647	0.333373	0.0739751	0.197501	0.0198652
20	0.219063		0.0918539	0.237169	0.129717	0.0889967	0.174941	0.292578	0.0162888	0.00420284	0.153314	0.0841422	0.34867	0.0642565	0.216351	0.00655583
20.5	0.229915		0.105918	0.235063	0.112388	0.0822298	0.189259	0.282448	0.0296729	0.0326825	0.162409	0.080405	0.360939	0.0764319	0.192151	0.0126121
21	0.221689		0.0818451	0.241384	0.115293	0.0776329	0.171263	0.292305	0.01754	0.019511	0.119149	0.0696459	0.32453	0.0531506	0.202233	0.0268625
21.5	0.249647		0.0793546	0.254325	0.126544	0.0835573	0.171188	0.297578	0.0191806	0.0291469	0.145342	0.0691033	0.340192	0.07177	0.218963	0.0331863
22	0.248577		0.0994994	0.220613	0.113101	0.0725911	0.204308	0.329022	0.0198727	0.0569157	0.130835	0.0575253	0.354815	0.0622031	0.197582	0.0314943
22.5	0.235262		0.0897286	0.224015	0.129852	0.0685983	0.17534	0.338816	0.0151441	0.0346768	0.136424	0.0701276	0.353974	0.0746485	0.213764	0.0407461
23	0.225722		0.10031	0.237097	0.126223	0.0787118	0.180881	0.323921	0.024771	0.0138007	0.129763	0.0795451	0.344453	0.0709746	0.202598	0.0258173
23.5	0.241204		0.107435	0.212852	0.12239	0.0713504	0.180111	0.354366	0.0109945	0.0312326	0.120362	0.0869477	0.330506	0.060006	0.220623	0.0255632
24	0.241771		0.132201	0.248325	0.125526	0.0676109	0.179762	0.324852	0.0264313	0.0290096	0.117755	0.069186	0.359931	0.0717509	0.188627	0.0337798
24.5	0.255123		0.0827617	0.281147	0.117055	0.0723257	0.143488	0.338275	0.0346999	0.0255571	0.119702	0.0782651	0.344753	0.0642898	0.190667	0.00367718
25	0.248326		0.0914804	0.225581	0.115776	0.0716593	0.196365	0.324985	0.0509139	0.0259572	0.104866	0.0751068	0.365617	0.0625029	0.229792	0.0144093
25.5	0.267216		0.128237	0.233337	0.117567	0.0654523	0.173254	0.328848	0.0169521	0.0320515	0.13917	0.0808702	0.373052	0.0726307	0.211321	0.0152733
26	0.286115		0.113192	0.253264	0.119285	0.0770081	0.168675	0.332884	0.0370357	0.0250554	0.105946	0.0979812	0.367427	0.0590669	0.217446	0.00547909
26.5	0.226641		0.102932	0.200353	0.120987	0.085374	0.182679	0.325016	0.02623	0.0201622	0.125498	0.0833359	0.341991	0.0615997	0.199339	0.00496119
27	0.275733		0.0949994	0.221291	0.115379	0.0721923	0.160019	0.334888	0.0447679	0.0242943	0.11477	0.0711828	0.384559	0.0619633	0.196469	-0.00320198
27.5	0.265122		0.102751	0.223074	0.113557	0.0752959	0.152428	0.310295	0.0291649	0.0528968	0.102429	0.0615832	0.333681	0.0690089	0.202204	0.00095877
28	0.247566		0.115263	0.193502	0.112961	0.0741938	0.180972	0.32685	0.0431056	0.0532357	0.114356	0.0871701	0.330295	0.0652727	0.203654	0.021874
28.5	0.309404		0.10038	0.221546	0.106026	0.0562283	0.163315	0.337449	0.0240074	0.0393387	0.126567	0.0458424	0.353134	0.07105	0.194982	0.0063752
29	0.269085		0.108677	0.19219	0.101394	0.0680762	0.143587	0.323053	0.0266613	0.0232518	0.109088	0.0626845	0.332446	0.0593545	0.18826	2.42063e-05
29.5	0.250977		0.12021	0.227142	0.132522	0.0618763	0.162619	0.332326	0.0322561	0.0489824	0.0908785	0.0617096	0.366675	0.0578445	0.204425	-0.00192806
Plateau (last 5 min)	0.264619		0.107812	0.219128	0.115545	0.0707356	0.168391	0.327659	0.0331095	0.0345226	0.113357	0.0727467	0.354888	0.0640294	0.204789	0.0064225
8hr	0.0818622	0.0569426	0.0804479	0.049919	0.0564844	0.0444563	0.0657692	0.0854478	0.0484782	0.0431482	0.0506438	0.0555133	0.0876987	0.0470063	0.0514305	0.0250671	0.0258812
12hr	0.120932	0.066187	0.083091	0.0548944	0.0602099	0.0477976	0.0793241	0.0932836	0.0560167	0.0470165	0.0527897	0.0638783	0.0853486	0.051667	0.0525438	0.0284238	0.0300284
Accumulation (%/hr)	0.119317	0.0405864	0.00821361	0.0249175	0.0164892	0.0187903	0.0515242	0.0229258	0.0388759	0.0224131	0.0105932	0.0376712	-0.00669935	0.0247877	0.00541142	0.033477	0.0400602
Subject	Strain	Radiotracer	Plateau (last 5 min, %ID/cc)	8hr (%ID/cc)	12hr (%ID/cc)	Accumulation (%/hr)
WT_R2	WT	ABs	-0.123047	0.0569426	0.066187	0.0405864
WT_RR	WT	ABs	0.219128	0.049919	0.0548944	0.0249175
PS19_F1	PS19	ABs	0.264619	0.0818622	0.120932	0.119317
PS19_F3	PS19	ABs	0.107812	0.0804479	0.083091	0.00821361
WT_L	WT	TAUb	0.0707356	0.0444563	0.0477976	0.0187903
WT_R1	WT	TAUb	0.327659	0.0854478	0.0932836	0.0229258
PS19_M1	PS19	TAUb	0.115545	0.0564844	0.0602099	0.0164892
PS19_F1	PS19	TAUb	0.168391	0.0657692	0.0793241	0.0515242
WT_R2	WT	TAUs	0.0345226	0.0431482	0.0470165	0.0224131
WT_R2	WT	TAUs	0.0727467	0.0555133	0.0638783	0.0376712
WT_LR	WT	TAUs	0.0640294	0.0470063	0.051667	0.0247877
WT_RR	WT	TAUs	0.204789	0.0514305	0.0525438	0.00541142
WT_R1	WT	TAUs	0.0064225	0.0250671	0.0284238	0.033477
PS19_F1	PS19	TAUs	0.0331095	0.0484782	0.0560167	0.0388759
PS19_F2	PS19	TAUs	0.113357	0.0506438	0.0527897	0.0105932
PS19_M1	PS19	TAUs	0.354888	0.0876987	0.0853486	-0.00669935
PS19_F3	PS19	TAUs		0.0258812	0.0300284	0.0400602

## Sheet: tau_rich_SNR
SNR = (mean ROI - mean whole brain) / SD whole brain
Scan_ID	Subject	Radiotracer	Amygdala	Hippocampus	Neocortex
20220217_PS19_12hr	PS19_F1	TAUs	0.137439	-0.211583	0.990474
20220225_PS19_12hr	PS19_F2	TAUs	0.44366	0.00655237	0.21329
20220302_PS19_12hr	PS19_M1	TAUs	0.149621	-0.0800838	0.51965
20220310_PS19_12hr	PS19_F3	TAUs	0.0248849	-0.182588	0.328466

## Sheet: fig4_TAUs_WT_vs_PS19
Mouse	Amygdala	Neocortex	Hippocampus	Whole Brain
WT_RR	0.040141	0.0811888	0.0483407	0.0525438
WT_R2	0.0432825	0.0717455	0.0445618	0.0470165
WT_R2	0.0770453	0.0854475	0.0628803	0.0638783
WT_R1	0.0295195	0.0396228	0.0284383	0.0284238
WT_LR	0.0665475	0.0744582	0.0486222	0.051667
PS19_M1	0.0960657	0.12257	0.0796124	0.0853486
PS19_F3	0.0308581	0.0409797	0.0239409	0.0300284
PS19_F2	0.0755141	0.0637821	0.0532536	0.0527897
PS19_F1	0.071396	0.0895512	0.0555846	0.0560167
Units in %ID/cc
Amygdala
WT	PS19
0.040141	0.0960657
0.0432825	0.0308581
0.0770453	0.0755141
0.0295195	0.071396
0.0665475
Descriptive Statistics				Multiplier	2.2			Shapiro-Wilk Test
	WT	PS19			WT	PS19			WT	PS19
Mean	0.0513072	0.0684584		Min	0.0295195	0.0308581		W-stat	0.924707	0.926604
Standard Error	0.00882752	0.0136454		Q1-Min	0.0106216	0.0304034		p-value	0.560747	0.574588
Median	0.0432825	0.073455		Med-Q1	0.00314146	0.0121935		alpha	0.05	0.05
Mode	#N/A	#N/A		Q3-Med	0.023265	0.00719696		normal	yes	yes
Standard Deviation	0.0197389	0.0272907		Max-Q3	0.0104978	0.0154137
Sample Variance	0.000389626	0.000744785		Mean	0.0513072	0.0684584		d'Agostino-Pearson
Kurtosis	-1.92467	2.01714
Skewness	0.451756	-1.04108		Min	0.0295195	0.0308581		DA-stat	#N/A	#N/A
Range	0.0475259	0.0652075		Q1	0.040141	0.0612615		p-value	#N/A	#N/A
Maximum	0.0770453	0.0960657		Median	0.0432825	0.073455		alpha	0.05	0.05
Minimum	0.0295195	0.0308581		Q3	0.0665475	0.080652		normal	#N/A	#N/A
Sum	0.256536	0.273834		Max	0.0770453	0.0960657
Count	5	4		Mean	0.0513072	0.0684584
Geometric Mean	0.0483034	0.063228
Harmonic Mean	0.0454966	0.0570899		Grand Min	0
AAD	0.0163914	0.0188002
MAD	0.013763	0.0123349		Outliers	None	None
IQR	0.0264065	0.0193905
T Test: Two Independent Samples
SUMMARY			Hyp Mean Diff	0
Groups	Count	Mean	Variance	Cohen d
WT	5	0.0513072	0.000389626
PS19	4	0.0684584	0.000744785
Pooled			0.000541837	0.736821
T TEST: Equal Variances				Alpha	0.05
	std err	t-stat	df	p-value	t-crit	lower	upper	sig	effect r
One Tail	0.0156149	1.09839	7	0.154186	1.89458			no	0.383423
Two Tail	0.0156149	1.09839	7	0.308373	2.36462	-0.0540748	0.0197722	no	0.383423
T TEST: Unequal Variances				Alpha	0.05
	std err	t-stat	df	p-value	t-crit	lower	upper	sig	effect r
One Tail	0.0162518	1.05535	5.33561	0.168346	1.98738			no	0.415562
Two Tail	0.0162518	1.05535	5.33561	0.336692	2.5227	-0.0581497	0.0238472	no	0.415562
Neocortex
WT	PS19
0.0811888	0.12257
0.0717455	0.0409797
0.0854475	0.0637821
0.0396228	0.0895512
0.0744582
Descriptive Statistics				Multiplier	2.2			Shapiro-Wilk Test
	WT	PS19			WT	PS19			WT	PS19
Mean	0.0704926	0.0792207		Min	0.0717455	0.0409797		W-stat	0.819059	0.989255
Standard Error	0.00808794	0.0175276		Q1-Min	0	0.0171018		p-value	0.114829	0.95362
Median	0.0744582	0.0766666		Med-Q1	0.00271264	0.0185851		alpha	0.05	0.05
Mode	#N/A	#N/A		Q3-Med	0.00673061	0.0211392		normal	yes	yes
Standard Deviation	0.0180852	0.0350553		Max-Q3	0.00425872	0.0247642
Sample Variance	0.000327074	0.00122887		Mean	0.0704926	0.0792207		d'Agostino-Pearson
Kurtosis	3.35117	-0.834347
Skewness	-1.74581	0.355321		Min	0.0717455	0.0409797		DA-stat	#N/A	#N/A
Range	0.0458247	0.0815904		Q1	0.0717455	0.0580815		p-value	#N/A	#N/A
Maximum	0.0854475	0.12257		Median	0.0744582	0.0766666		alpha	0.05	0.05
Minimum	0.0396228	0.0409797		Q3	0.0811888	0.0978059		normal	#N/A	#N/A
Sum	0.352463	0.316883		Max	0.0854475	0.12257
Count	5	4		Mean	0.0704926	0.0792207
Geometric Mean	0.0681349	0.0731864
Harmonic Mean	0.0652515	0.0673331		Grand Min	0
AAD	0.0123479	0.0268399
MAD	0.00673061	0.0242857		Outliers	0.0396228	None
IQR	0.00944325	0.0397244
T Test: Two Independent Samples
SUMMARY			Hyp Mean Diff	0
Groups	Count	Mean	Variance	Cohen d
WT	5	0.0704926	0.000327074
PS19	4	0.0792207	0.00122887
Pooled			0.000713558	0.326745
T TEST: Equal Variances				Alpha	0.05
	std err	t-stat	df	p-value	t-crit	lower	upper	sig	effect r
One Tail	0.0179193	0.487083	7	0.32054	1.89458			no	0.181057
Two Tail	0.0179193	0.487083	7	0.641081	2.36462	-0.0511006	0.0336442	no	0.181057
T TEST: Unequal Variances				Alpha	0.05
	std err	t-stat	df	p-value	t-crit	lower	upper	sig	effect r
One Tail	0.0193037	0.452151	4.26843	0.336596	2.0939			no	0.213792
Two Tail	0.0193037	0.452151	4.26843	0.673193	2.70892	-0.0610204	0.043564	no	0.213792
Hippocampus
WT	PS19
0.0483407	0.0796124
0.0445618	0.0239409
0.0628803	0.0532536
0.0284383	0.0555846
0.0486222
Descriptive Statistics				Multiplier	2.2			Shapiro-Wilk Test
	WT	PS19			WT	PS19			WT	PS19
Mean	0.0465687	0.0530979		Min	0.0445618	0.0239409		W-stat	0.939976	0.957892
Standard Error	0.00550529	0.0113994		Q1-Min	0	0.0219846		p-value	0.665767	0.765643
Median	0.0483407	0.0544191		Med-Q1	0.00377889	0.00849369		alpha	0.05	0.05
Mode	#N/A	#N/A		Q3-Med	0.000281448	0.00717244		normal	yes	yes
Standard Deviation	0.0123102	0.0227988		Max-Q3	0	0.0180208
Sample Variance	0.000151541	0.000519786		Mean	0.0465687	0.0530979		d'Agostino-Pearson
Kurtosis	1.73708	1.51478
Skewness	-0.360375	-0.344947		Min	0.0445618	0.0239409		DA-stat	#N/A	#N/A
Range	0.034442	0.0556715		Q1	0.0445618	0.0459254		p-value	#N/A	#N/A
Maximum	0.0628803	0.0796124		Median	0.0483407	0.0544191		alpha	0.05	0.05
Minimum	0.0284383	0.0239409		Q3	0.0486222	0.0615916		normal	#N/A	#N/A
Sum	0.232843	0.212391		Max	0.0486222	0.0796124
Count	5	4		Mean	0.0465687	0.0530979
Geometric Mean	0.0451342	0.0487367
Harmonic Mean	0.0435688	0.0439082		Grand Min	0
AAD	0.00805488	0.0145785
MAD	0.00377889	0.0131794		Outliers	0.0628803	None
IQR	0.00406034	0.0156661			0.0284383
T Test: Two Independent Samples
SUMMARY			Hyp Mean Diff	0
Groups	Count	Mean	Variance	Cohen d
WT	5	0.0465687	0.000151541
PS19	4	0.0530979	0.000519786
Pooled			0.00030936	0.371217
T TEST: Equal Variances				Alpha	0.05
	std err	t-stat	df	p-value	t-crit	lower	upper	sig	effect r
One Tail	0.0117988	0.553377	7	0.298614	1.89458			no	0.204727
Two Tail	0.0117988	0.553377	7	0.597228	2.36462	-0.034429	0.0213706	no	0.204727
T TEST: Unequal Variances				Alpha	0.05
	std err	t-stat	df	p-value	t-crit	lower	upper	sig	effect r
One Tail	0.0126592	0.515768	4.38376	0.315475	2.07934			no	0.239187
Two Tail	0.0126592	0.515768	4.38376	0.630949	2.68317	-0.0404959	0.0274375	no	0.239187
Whole Brain
WT	PS19
0.0525438	0.0853486
0.0470165	0.0300284
0.0638783	0.0527897
0.0284238	0.0560167
0.051667
Descriptive Statistics				Multiplier	2.2			Shapiro-Wilk Test
	WT	PS19			WT	PS19			WT	PS19
Mean	0.0487059	0.0560459		Min	0.0470165	0.0300284		W-stat	0.928069	0.961515
Standard Error	0.00577892	0.0113511		Q1-Min	0	0.017071		p-value	0.583264	0.788439
Median	0.051667	0.0544032		Med-Q1	0.00465041	0.00730381		alpha	0.05	0.05
Mode	#N/A	#N/A		Q3-Med	0.000876829	0.00894647		normal	yes	yes
Standard Deviation	0.0129221	0.0227021		Max-Q3	0.0113345	0.0219989
Sample Variance	0.00016698	0.000515387		Mean	0.0487059	0.0560459		d'Agostino-Pearson
Kurtosis	1.97571	1.50364
Skewness	-0.921673	0.428189		Min	0.0470165	0.0300284		DA-stat	#N/A	#N/A
Range	0.0354546	0.0553202		Q1	0.0470165	0.0470994		p-value	#N/A	#N/A
Maximum	0.0638783	0.0853486		Median	0.051667	0.0544032		alpha	0.05	0.05
Minimum	0.0284238	0.0300284		Q3	0.0525438	0.0633497		normal	#N/A	#N/A
Sum	0.243529	0.224183		Max	0.0638783	0.0853486
Count	5	4		Mean	0.0487059	0.0560459
Geometric Mean	0.0470982	0.0524685
Harmonic Mean	0.0452521	0.0488918		Grand Min	0
AAD	0.00878858	0.0146514
MAD	0.00465041	0.0129941		Outliers	0.0284238	None
IQR	0.00552724	0.0162503
T Test: Two Independent Samples
SUMMARY			Hyp Mean Diff	0
Groups	Count	Mean	Variance	Cohen d
WT	5	0.0487059	0.00016698
PS19	4	0.0560459	0.000515387
Pooled			0.000316297	0.412712
T TEST: Equal Variances				Alpha	0.05
	std err	t-stat	df	p-value	t-crit	lower	upper	sig	effect r
One Tail	0.0119304	0.615235	7	0.278932	1.89458			no	0.226494
Two Tail	0.0119304	0.615235	7	0.557863	2.36462	-0.0355508	0.0208709	no	0.226494
T TEST: Unequal Variances				Alpha	0.05
	std err	t-stat	df	p-value	t-crit	lower	upper	sig	effect r
One Tail	0.0127375	0.576252	4.52852	0.295944	2.06233			no	0.261377
Two Tail	0.0127375	0.576252	4.52852	0.591889	2.6532	-0.041135	0.0264551	no	0.261377

## Sheet: fig5_regional_quantification
Radiotracer	ABs				Radiotracer	TAUs
Number of WT	2				Number of WT	5
Number of PS19	2				Number of PS19	4
ROI	WT_mean_SUVR	PS19_mean_SUVR	Difference (%)		ROI	WT_mean_SUVR	PS19_mean_SUVR	Difference (%)
Amygdala	1.10814	1.21143	0.0932109		Thalamus	0.536656	0.691143	0.287871
Hypothalamus	1.14954	1.23191	0.0716557		Inferior colliculi	1.0433	1.30871	0.254396
Basal forebrain and septum	1.15818	1.24055	0.0711232		Amygdala	1.04344	1.21455	0.163986
Brainstem	0.961894	1.02059	0.0610186		Central gray	0.731761	0.833932	0.139623
Hippocampus	0.711893	0.712354	0.00064813		Brainstem	1.06089	1.17961	0.111913
Whole Brain	1	1	0		Cerebellum	0.995251	1.09127	0.0964803
Globus pallidus	0.615333	0.598245	-0.0277695		Globus pallidus	0.656388	0.695247	0.0592006
Neocortex	1.43094	1.37339	-0.040216		Hypothalamus	1.21837	1.26829	0.0409759
Cerebellum	1.05654	0.970309	-0.0816164		Rest of the midbrain	0.67114	0.692067	0.0311819
External capsule	0.943238	0.801932	-0.14981		Basal forebrain and septum	1.18643	1.20803	0.0182008
Thalamus	0.650093	0.520038	-0.200056		Whole Brain	1	1	0
Rest of the midbrain	0.715874	0.562816	-0.213806		Caudate putamen	0.858168	0.852771	-0.00628875
Caudate putamen	1.08561	0.724418	-0.332707		Hippocampus	0.958751	0.932785	-0.0270836
Central gray	0.827345	0.535542	-0.352698		Neocortex	1.44878	1.40192	-0.0323442
Inferior colliculi	1.74563	0.85025	-0.512927		Superior colliculi	1.15721	1.09736	-0.0517165
Superior colliculi	1.71096	0.81988	-0.520808		External capsule	1.04998	0.931141	-0.113182
